# Supplementary material for: Dietary Protein Affects Gene Expression and Prevents Lipid Accumulation in the Liver in Mice
Source: PLOS journal article supplement (doi:10.1371/journal.pone.0047303), 2012-10-23
Supplement: S1 (10.1371/journal.pone.0047303.s001) [file journal.pone.0047303.s001]

# Amino acid & nitrogen metabolism

# Energy & oxidative metabolism

## Other processes

# Amino acid catabolism

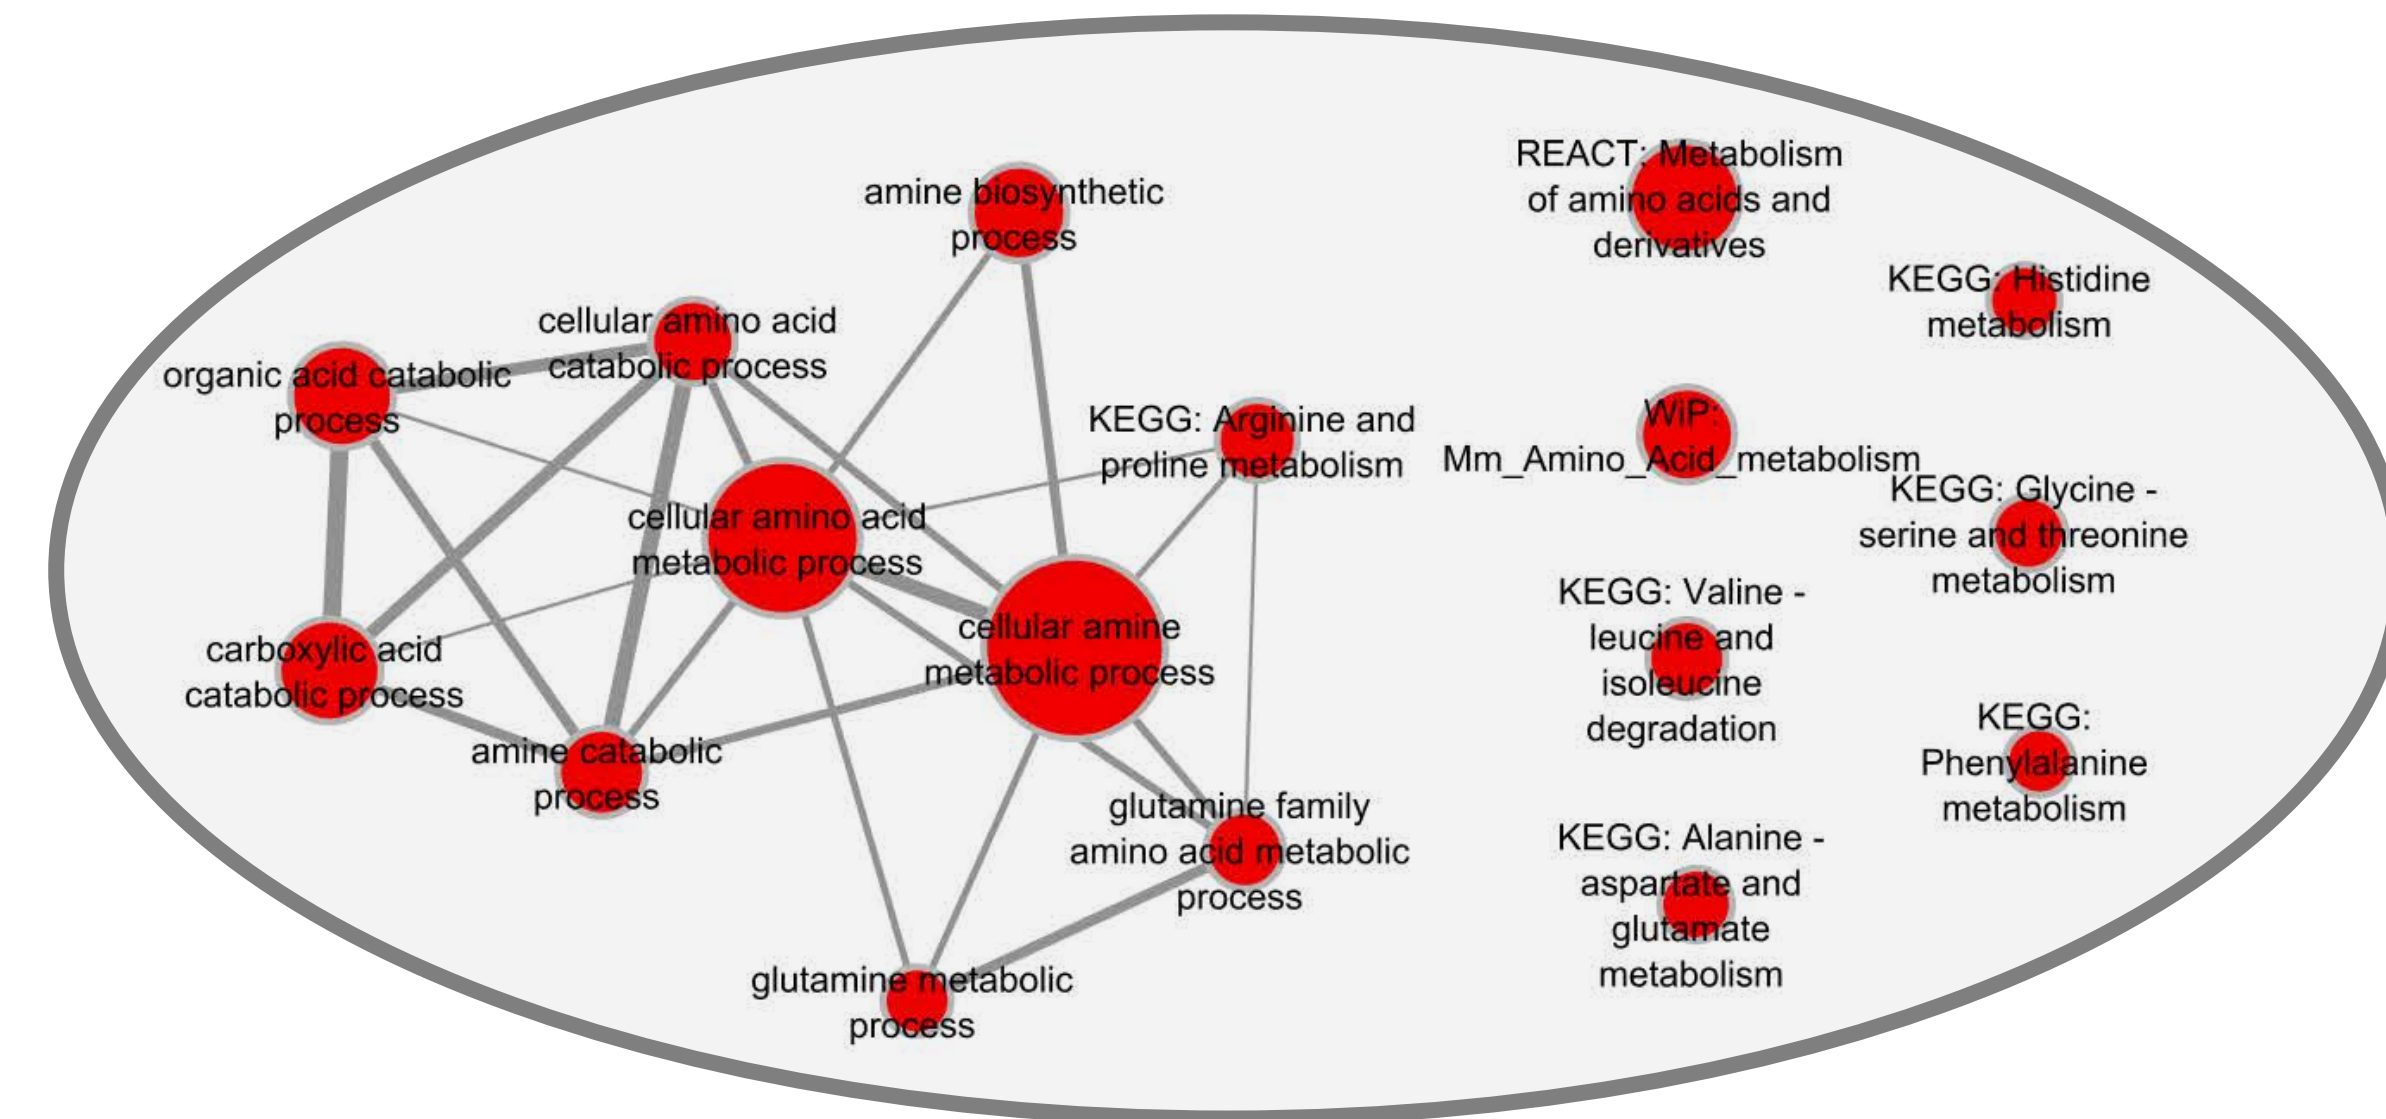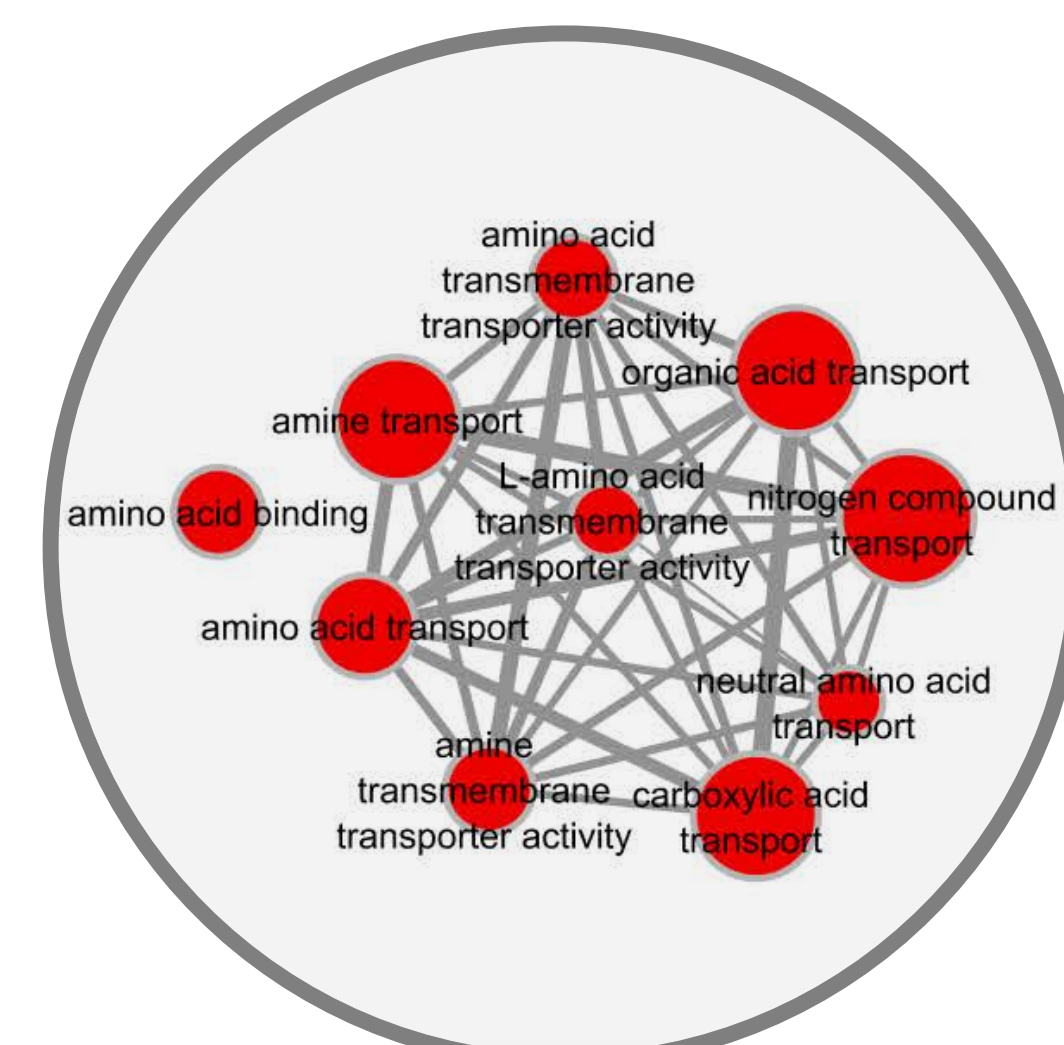

## Amino acid transport

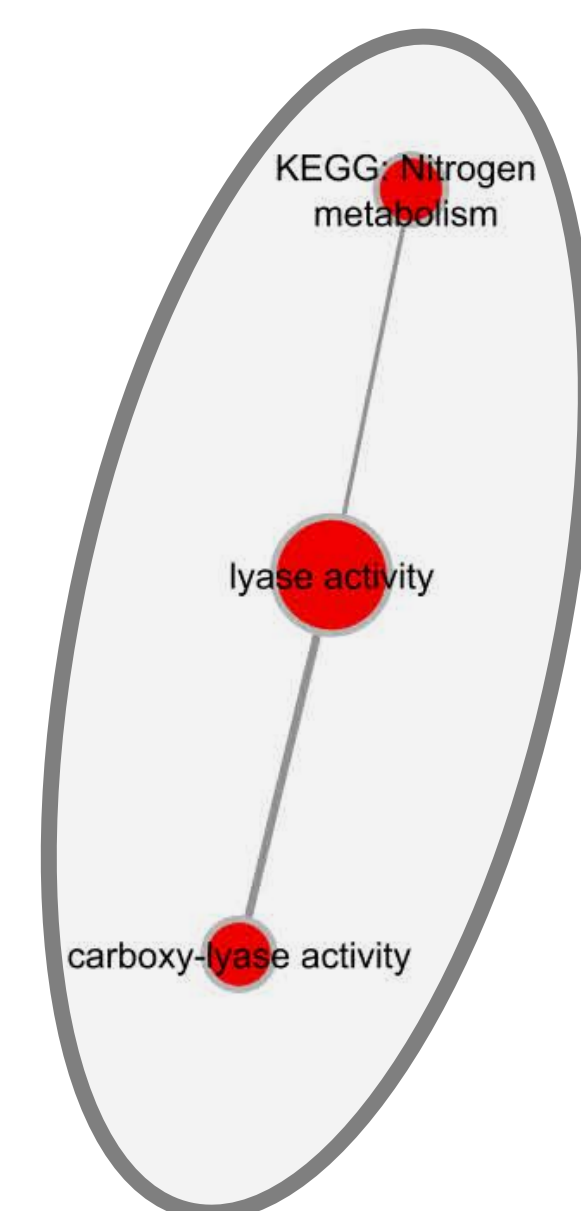

# Nitrogen metabolism

PFAM: Serpin (serine protease inhibitor)

## Serine protease inhibitor

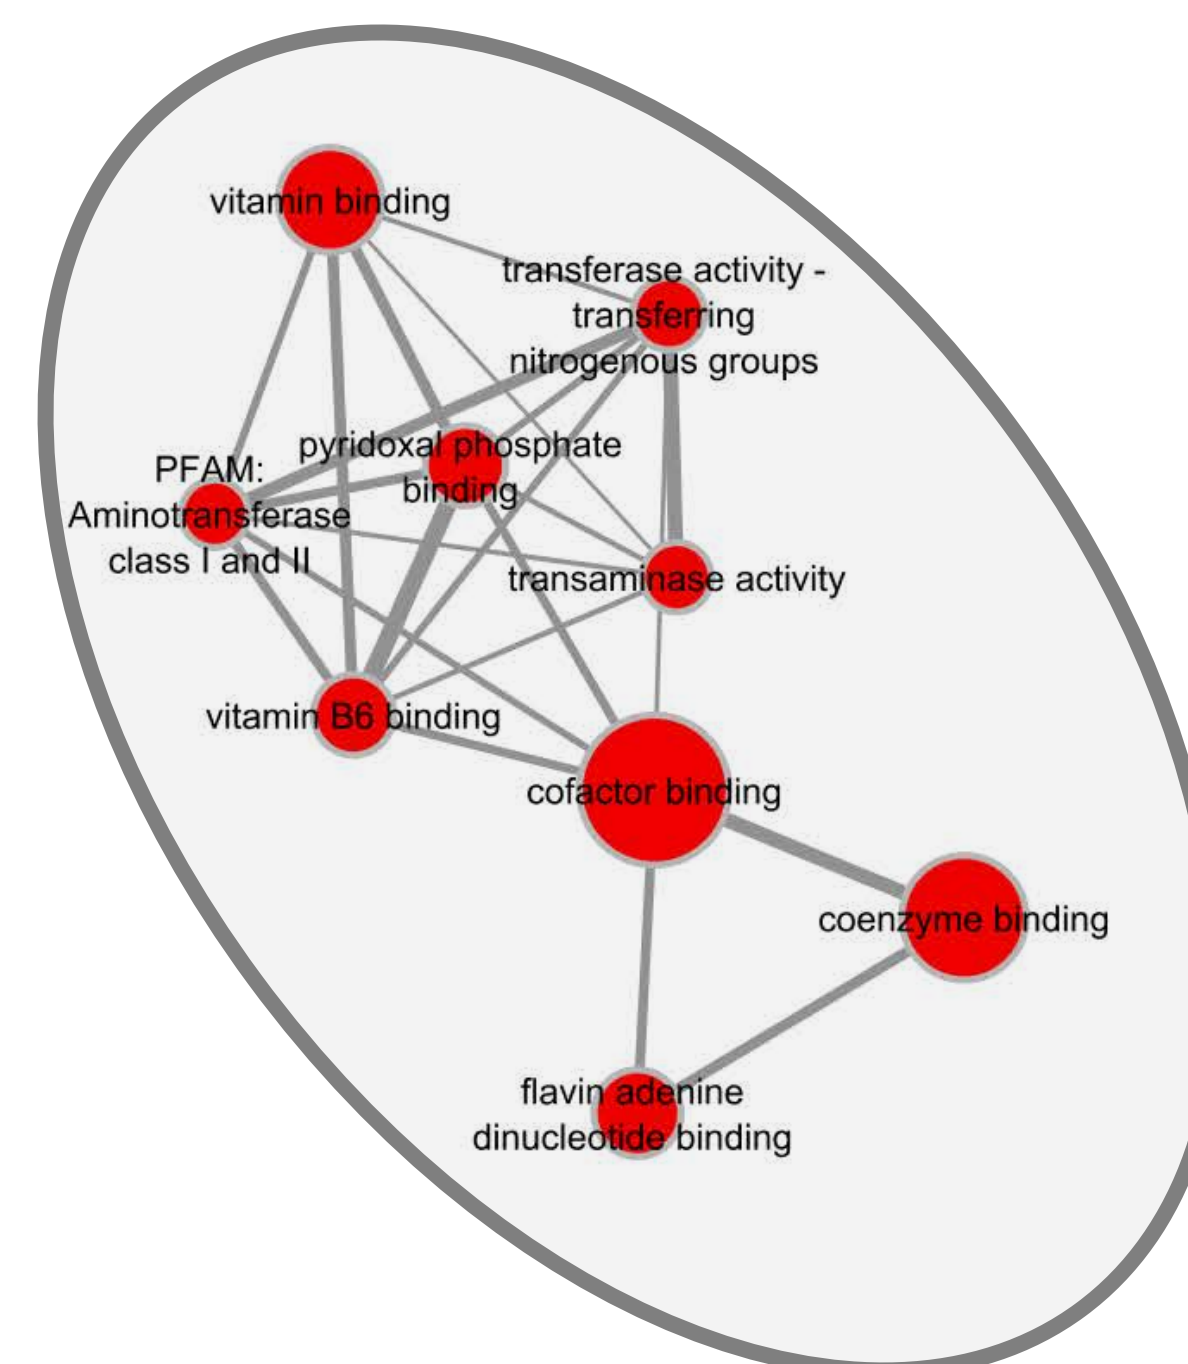

# Transamination

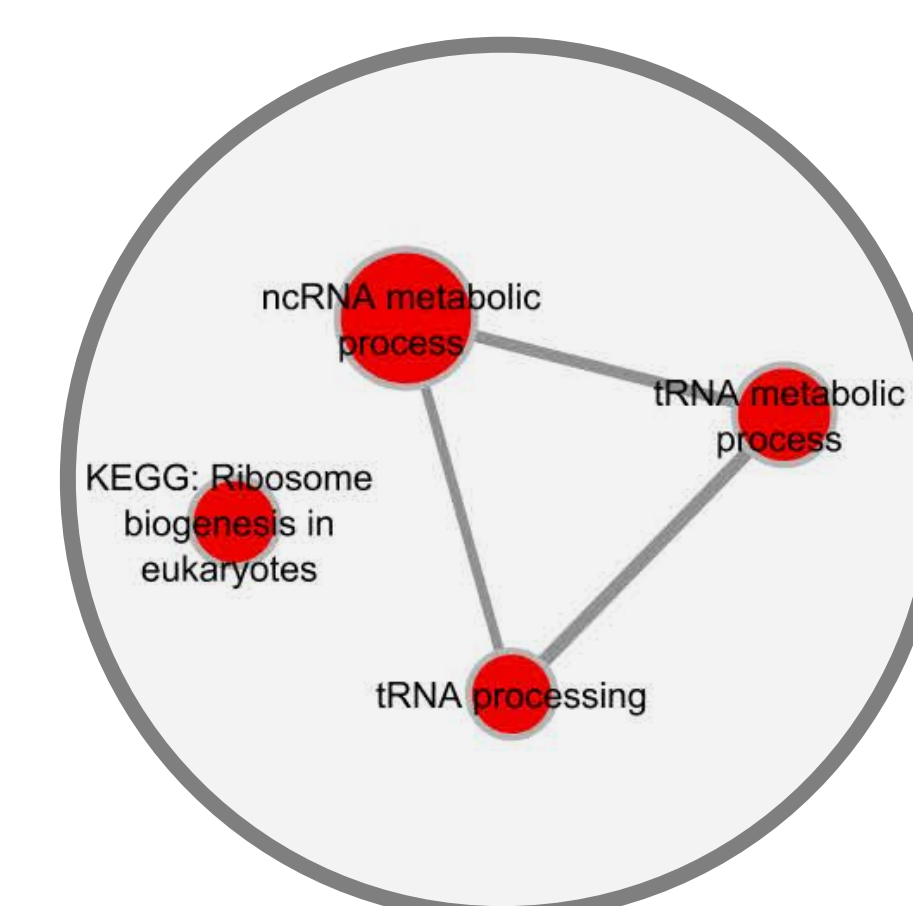

## Translation

## Nucleotide biosynthesis

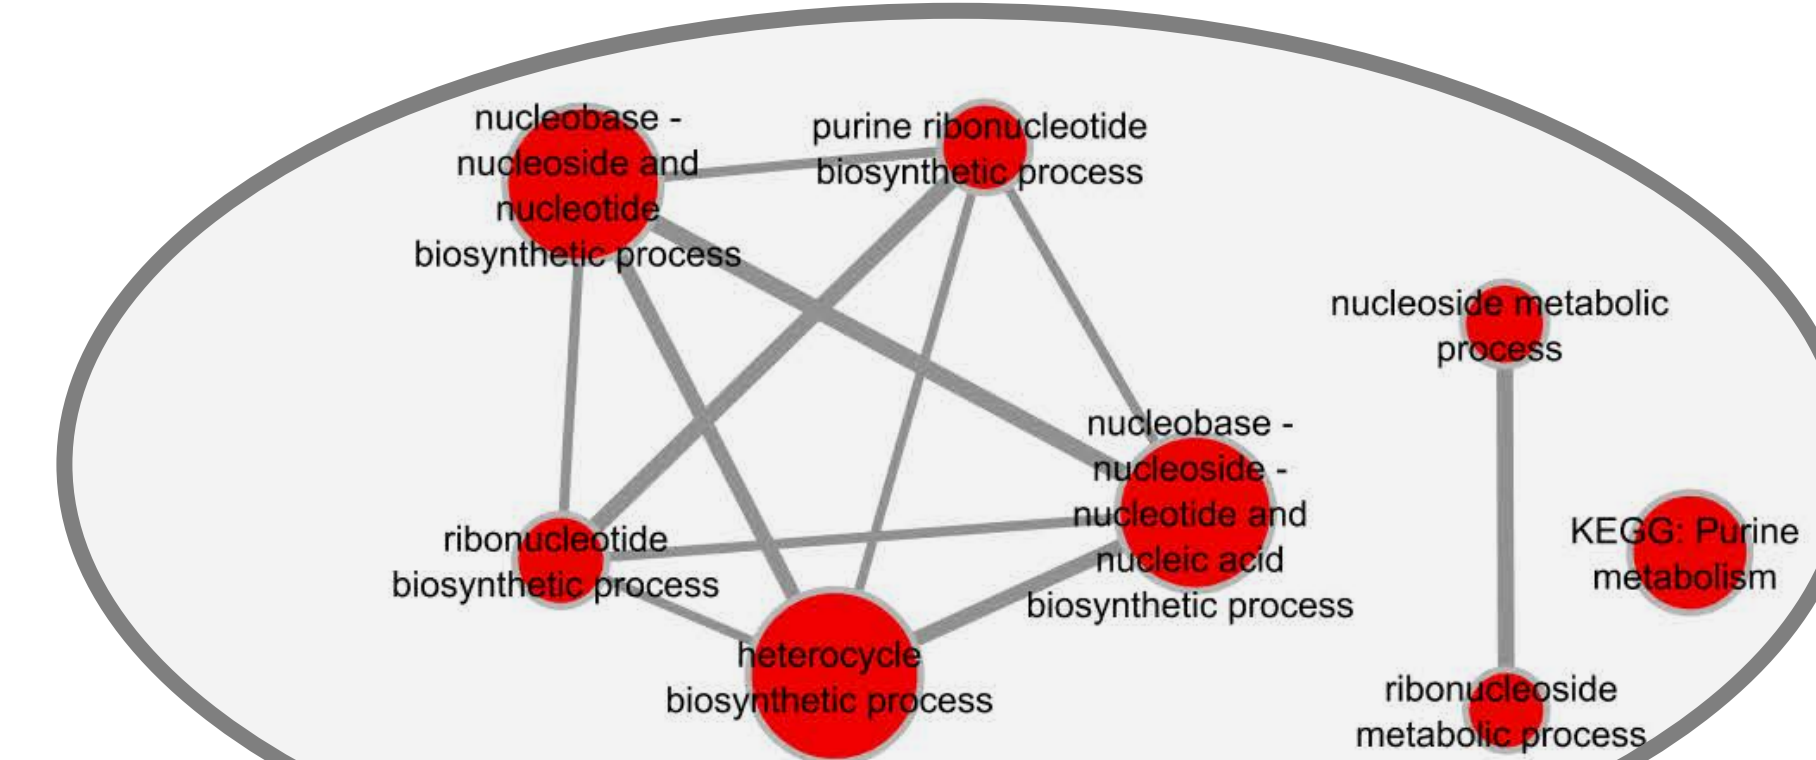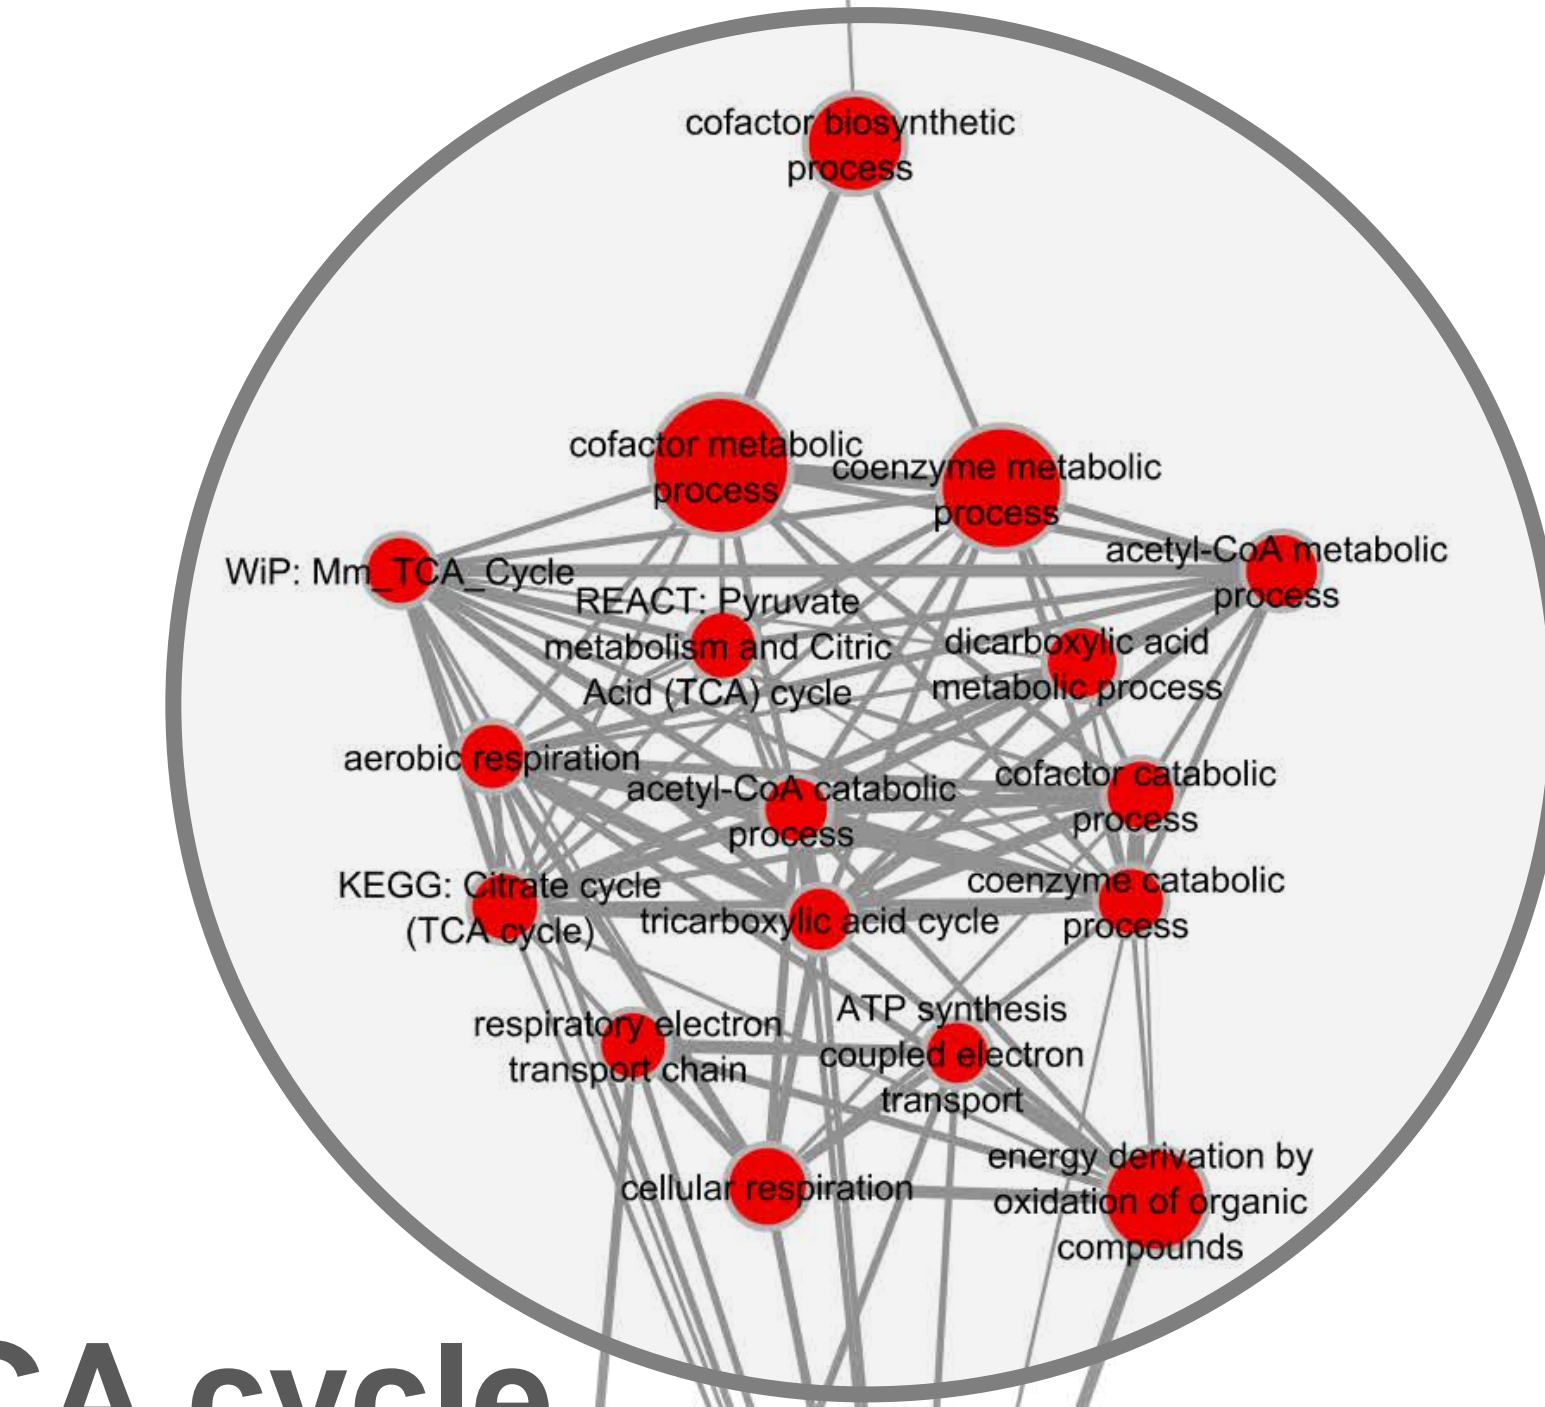

## TCA cycle

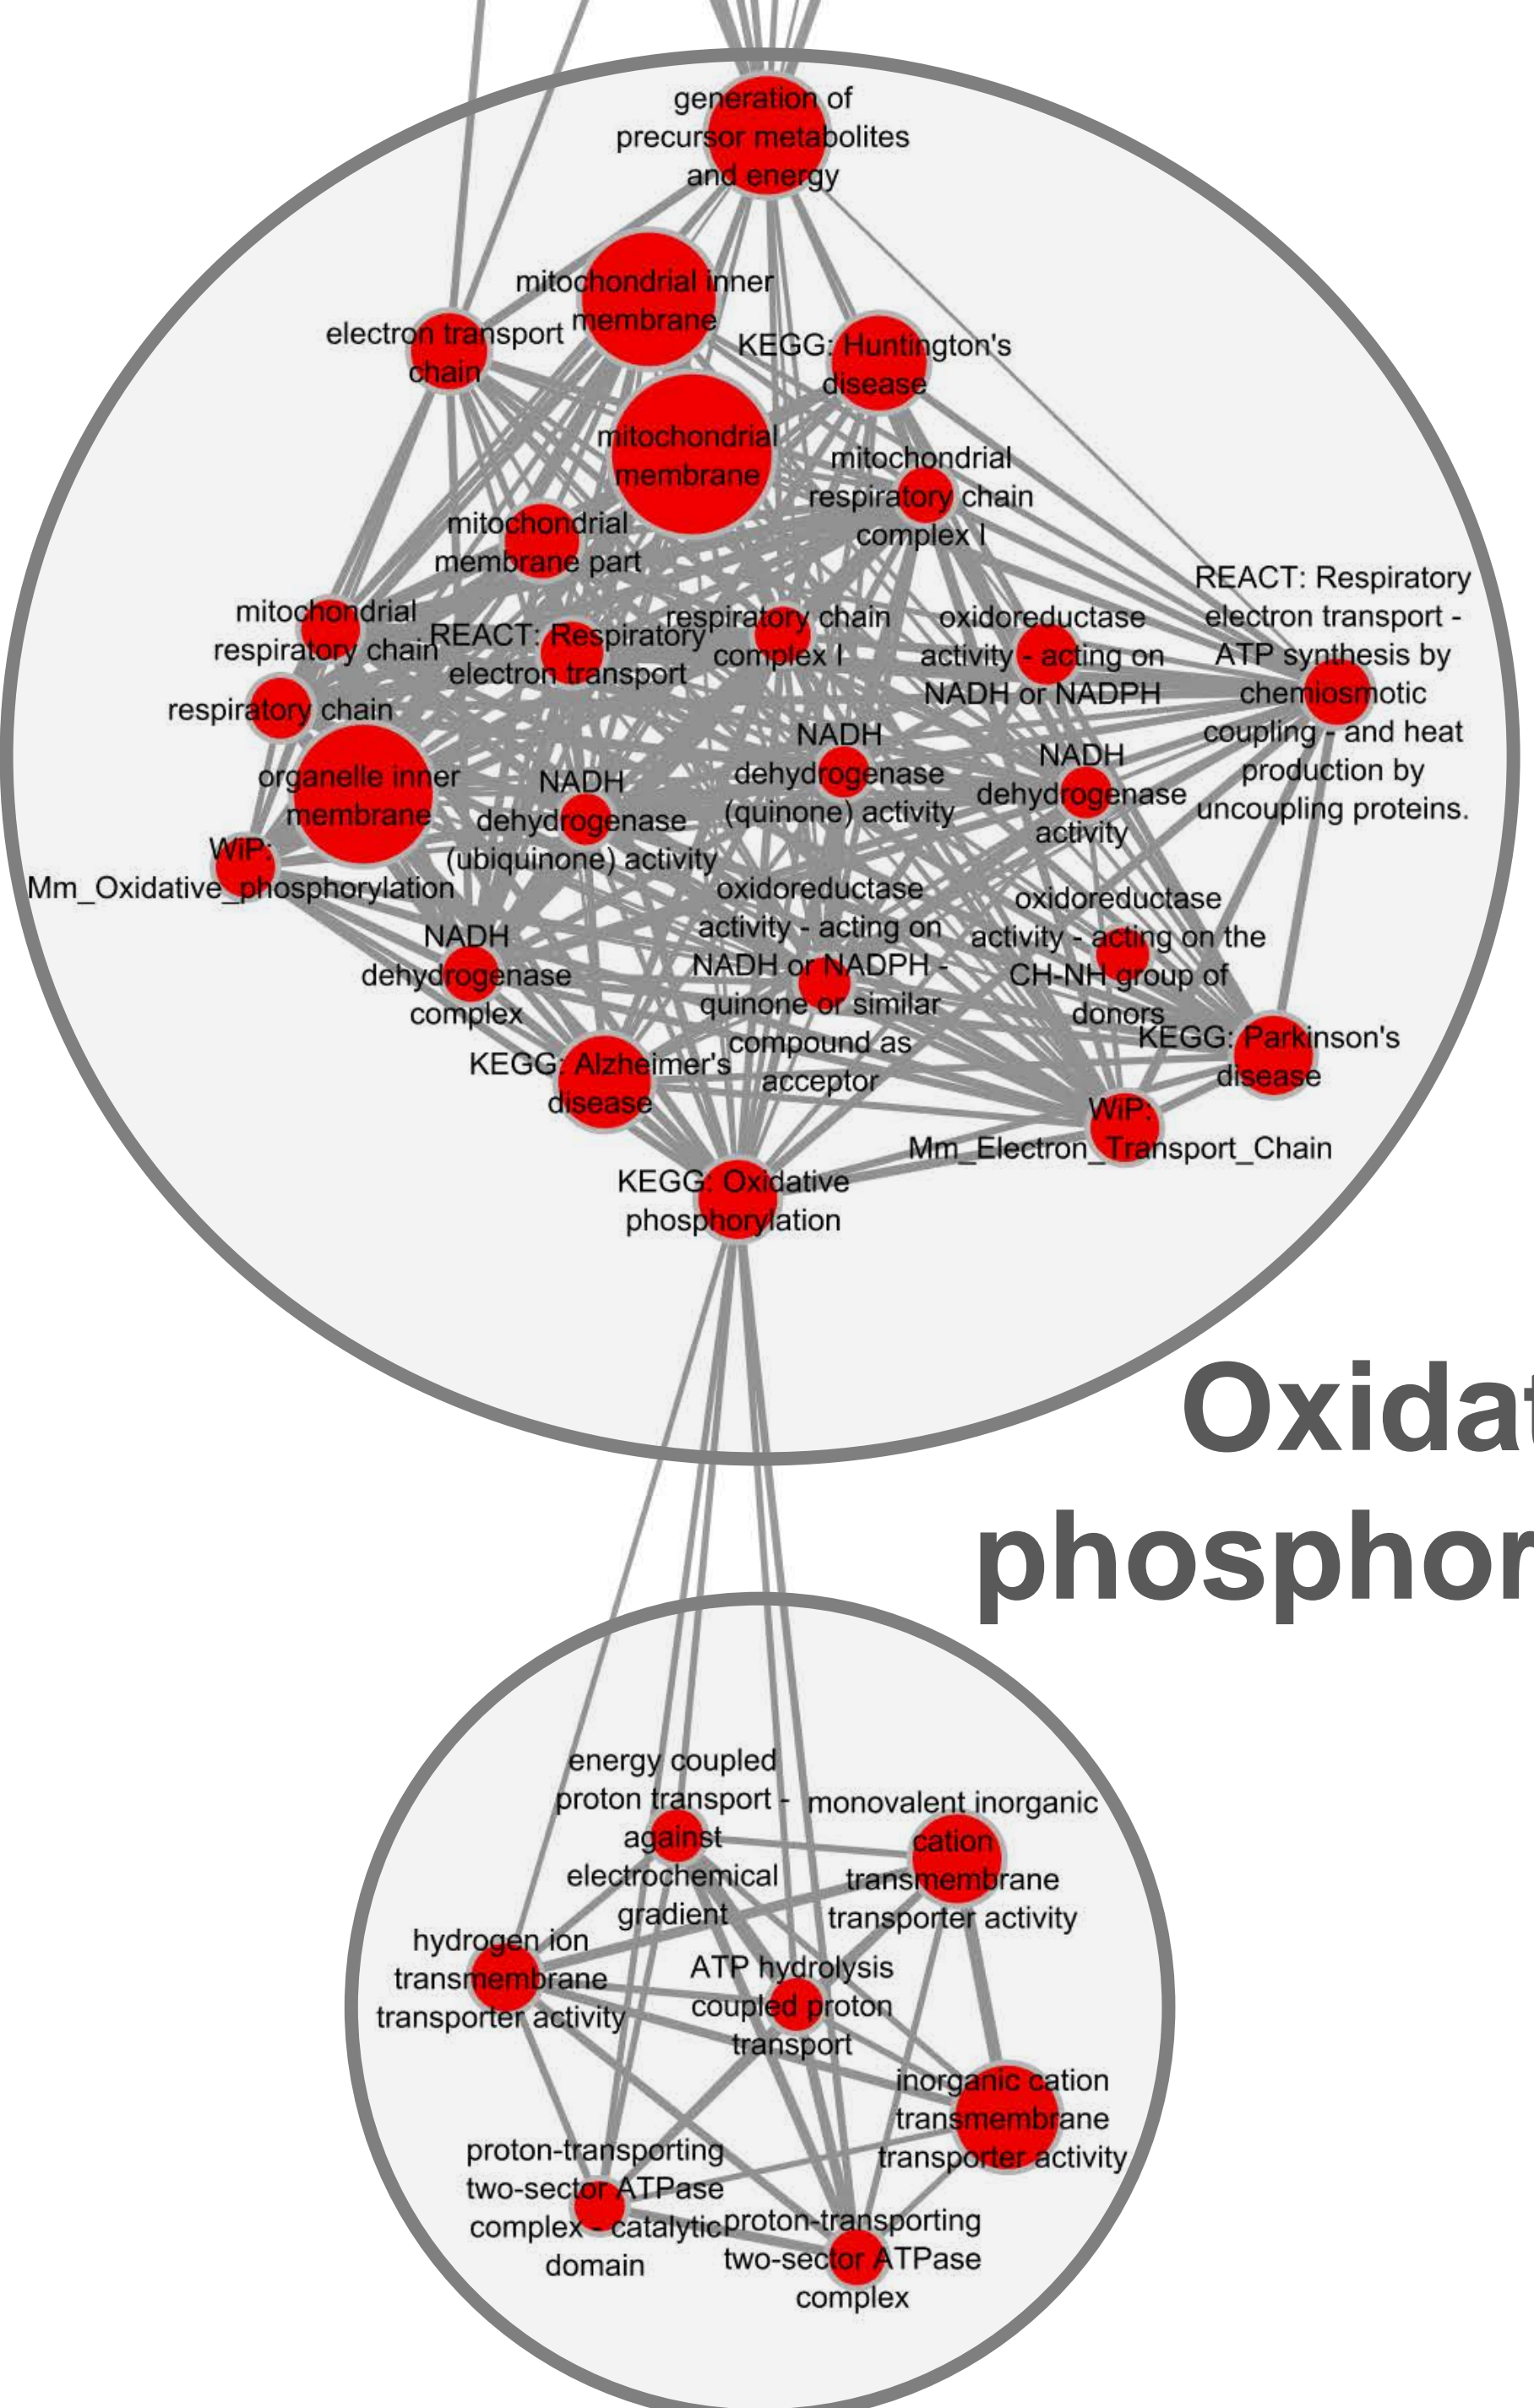

## Transmembrane transport

## Sterol metabolism

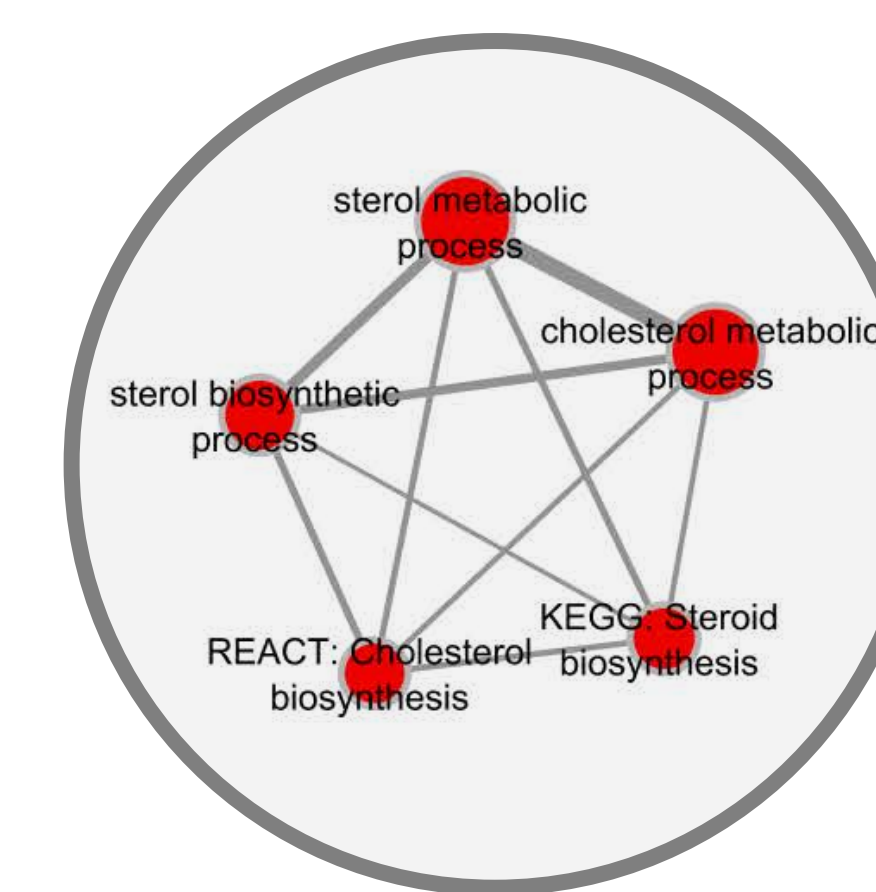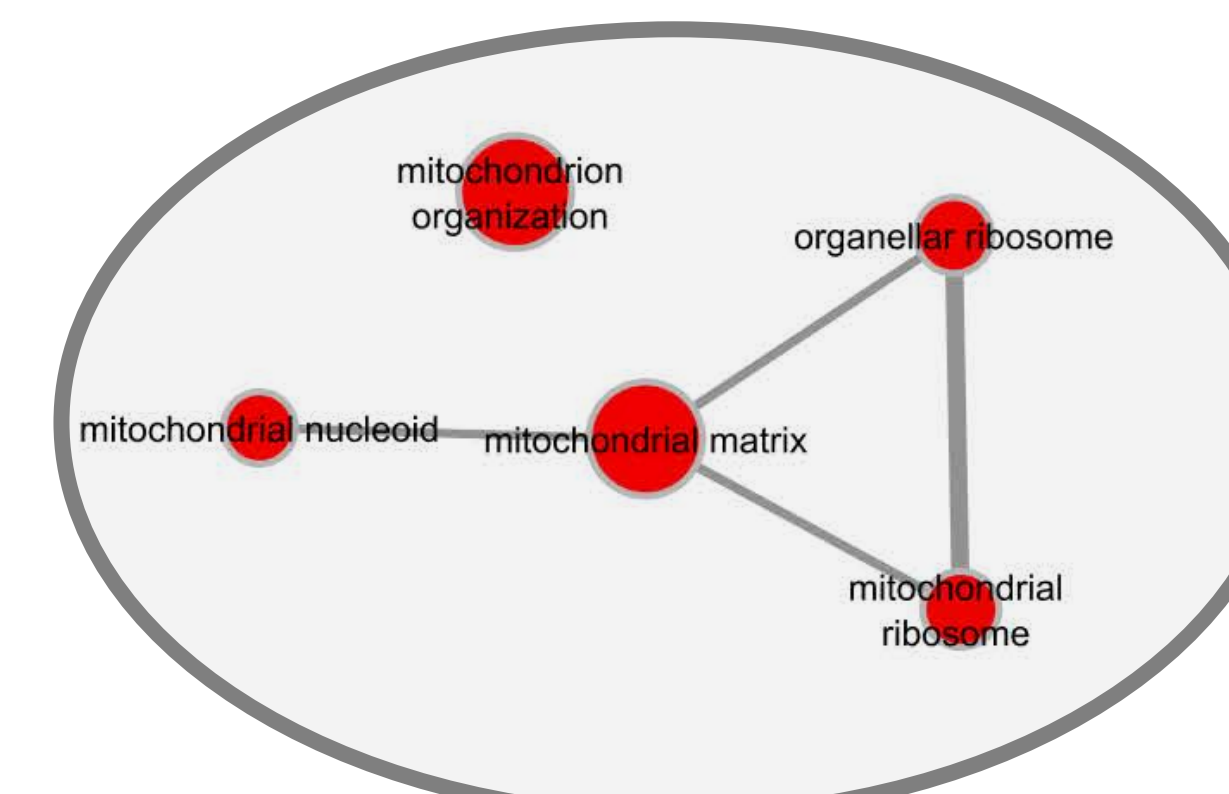

## Biosynthesis of mitochondria

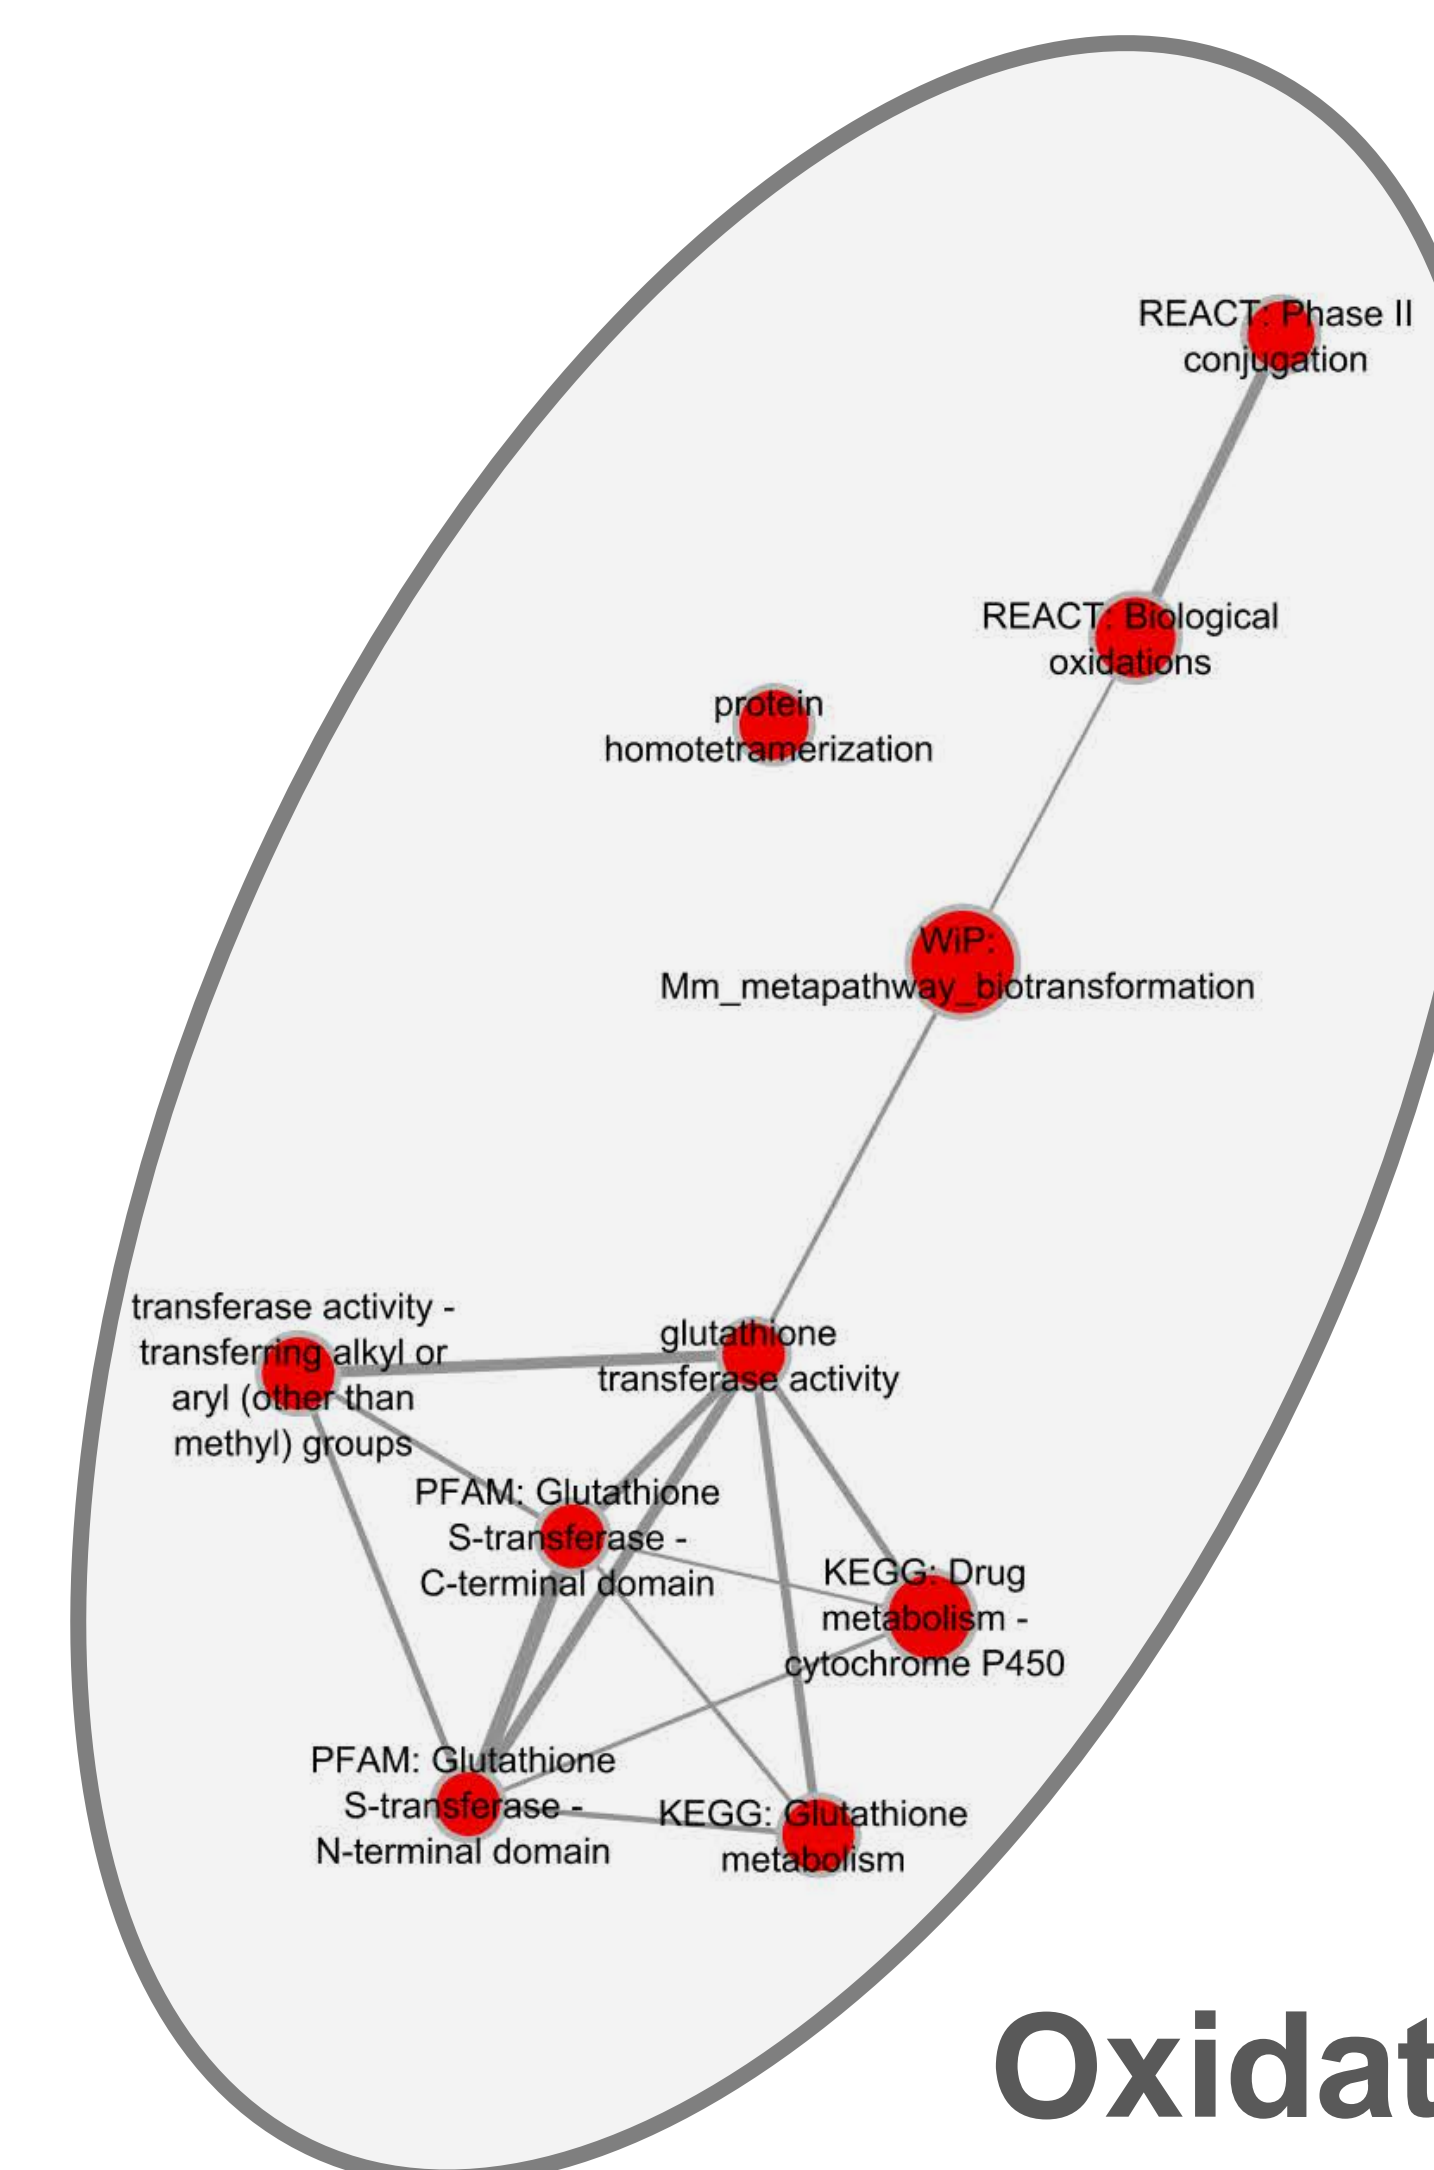

## Oxidative stress response

## Adipogenesis

WiP:  
Mm\_Adipogenesis

## Carboxylesterase

PFAM:  
Carboxylesterase

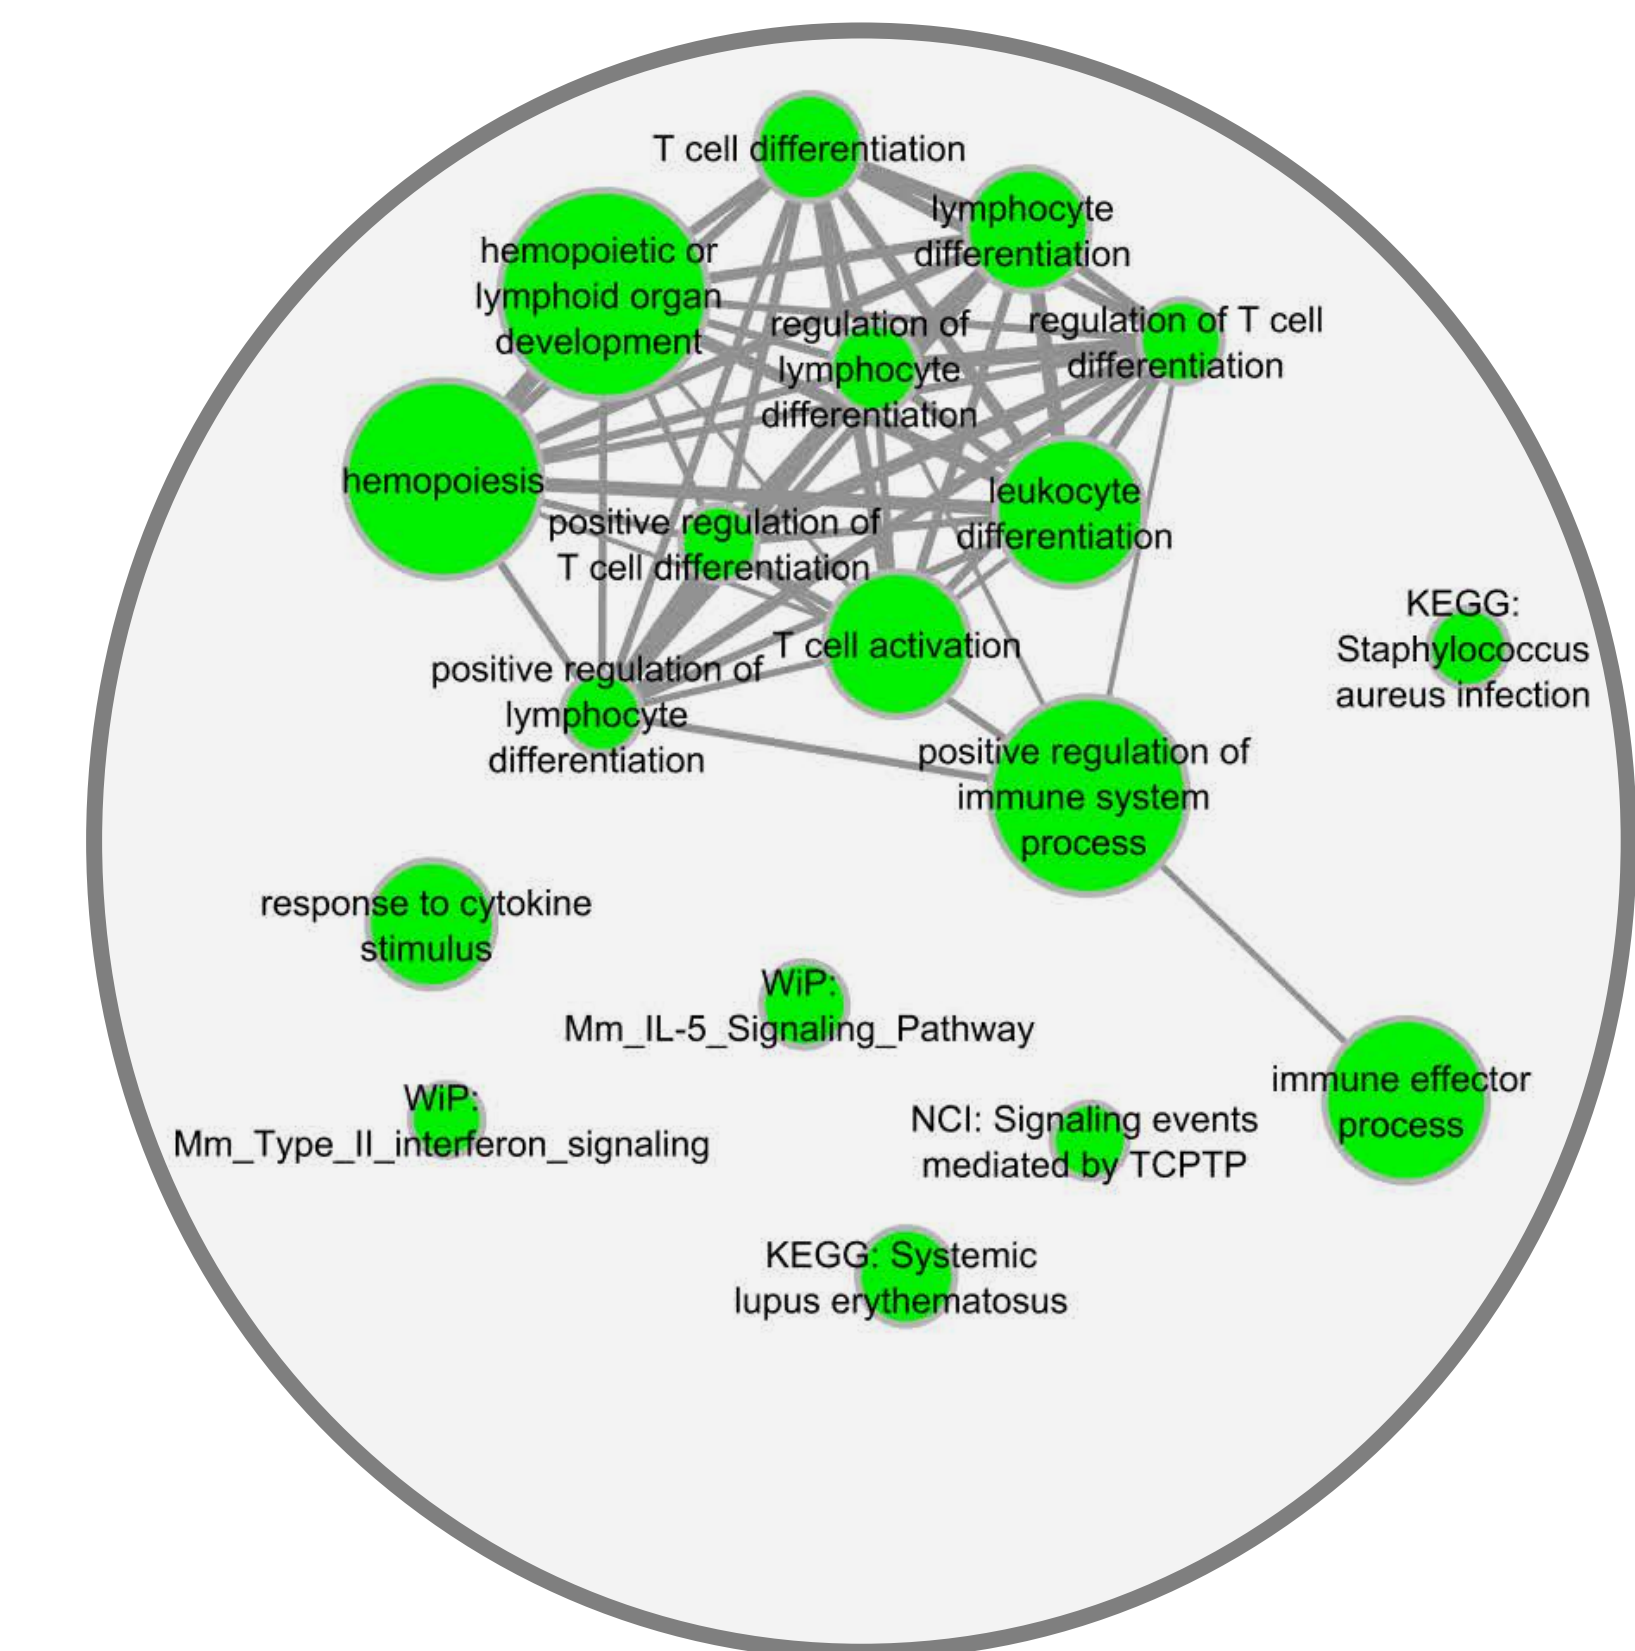

## Adaptive immunity

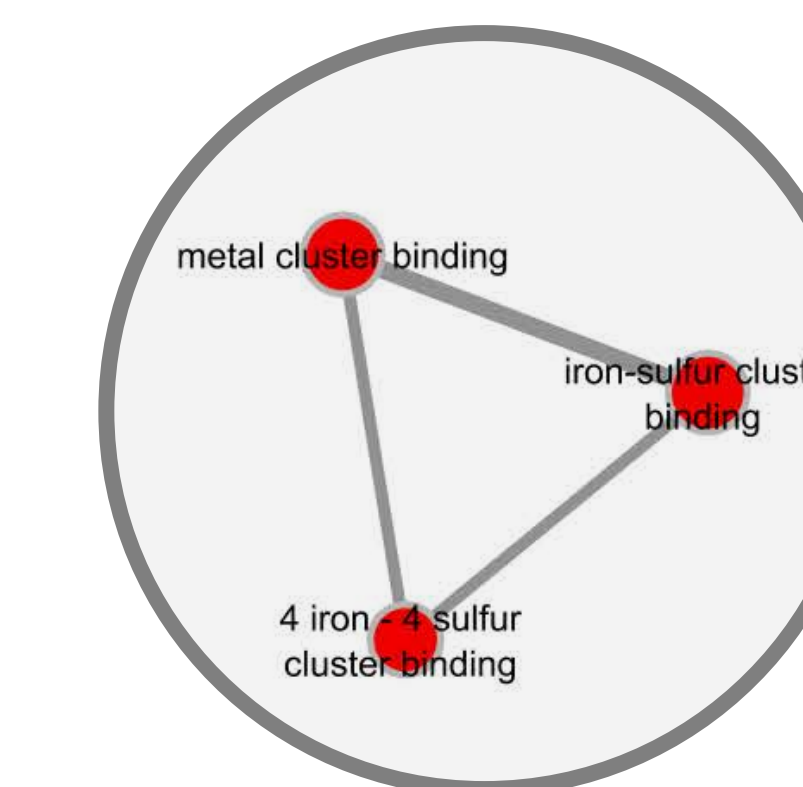

## Metal cluster binding

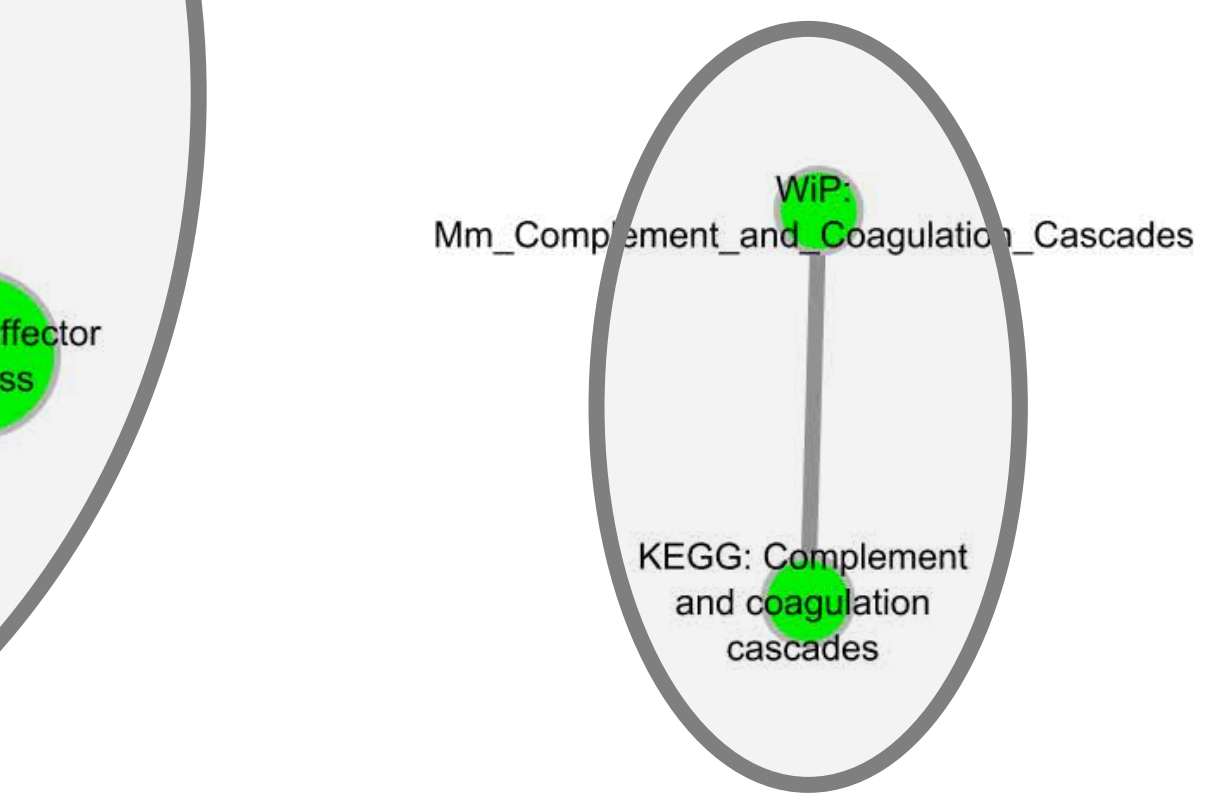

## Innate immunity

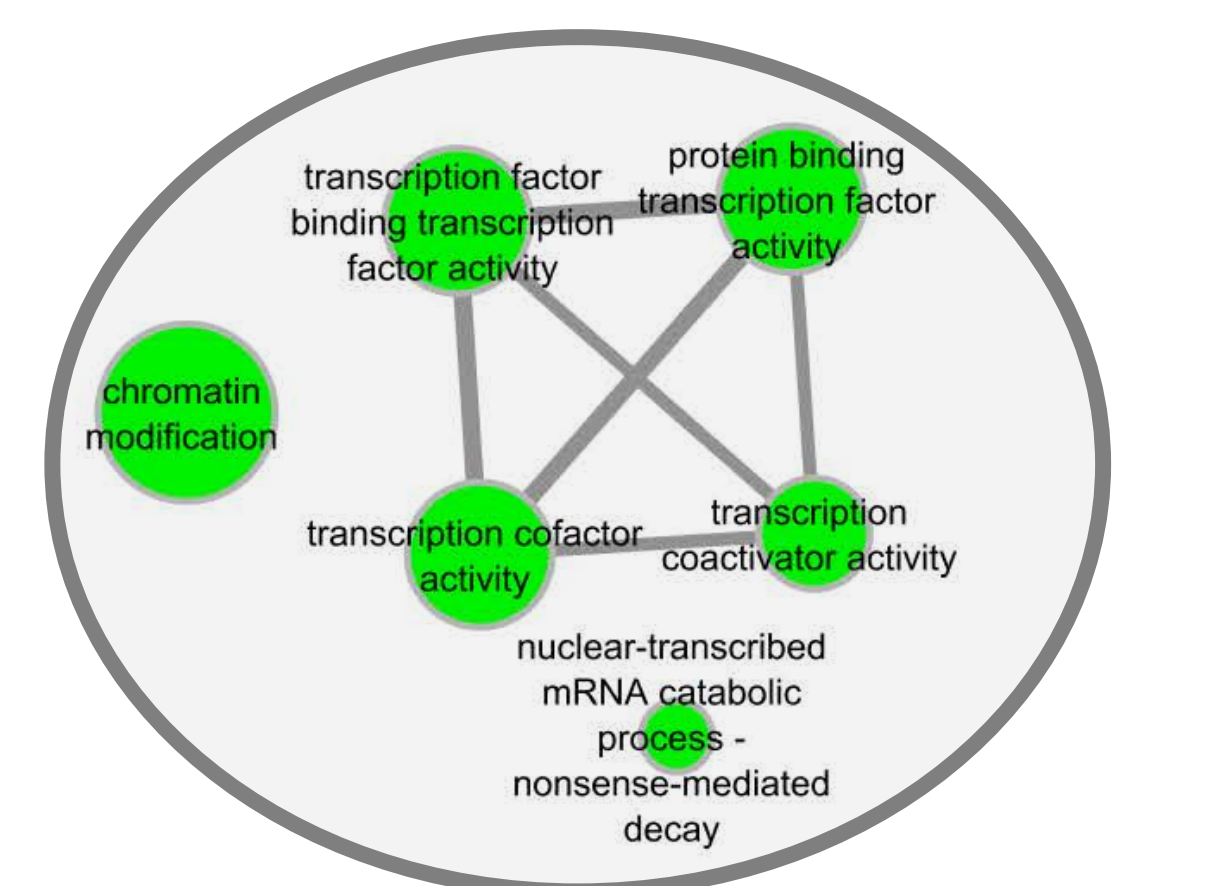

## Transcription

UP      DOWN



HP vs. NP diet
