# Supplementary material for: Dietary Protein Affects Gene Expression and Prevents Lipid Accumulation in the Liver in Mice
Source: PLoS One. 2012 Oct 23;7(10):e47303. doi: 10.1371/journal.pone.0047303 (PMC3479095; doi:10.1371/journal.pone.0047303)
Supplement: Table S1 — Heat maps of genes contributing to the enrichment of the gene sets within selected clusters of processes. For each of those genes, fold changes (FC) of signal intensity of the treatment group in comparison with the reference group at week 0 were calculated and expressed in a heat map. Red colour represents up regulation and green colour represents down regulation of a gene in comparison with the reference group. Additionally, genes contained in gene sets describing fatty acid oxidation are expressed. (XLSX) [file pone.0047303.s002.xlsx]

## Sheet: AA_catabolism
Gene name	description		LF-NP_1W	HF-NP_1W	LF-HP_1W	HF-HP_1W	LF-NP_12W	HF-NP_12W	LF-HP_12W	HF-HP_12W
ACMSD	amino carboxymuconate semialdehyde decarboxylase		0.757483	0.990793	2.56981	2.81805	0.621655	0.473397	1.89273	3.09719
ALDH1B1	aldehyde dehydrogenase 1 family, member B1		0.901435	0.821167	1.74595	3.54234	0.66439	0.865788	1.95276	3.79617
ASNS	asparagine synthetase		1.16005	0.903837	1.38136	6.88436	0.929718	0.679527	1.08394	2.89423
SDS	serine dehydratase		0.824263	0.799088	1.72811	1.73912	0.760205	0.557912	1.4253	1.89125
GSTM3	glutathione S-transferase, mu 3		1.28555	1.27027	1.84372	4.80299	1.3769	0.887207	1.62365	1.71676
GOT1	glutamate oxaloacetate transaminase 1, soluble		0.931644	0.863746	1.66962	1.62075	0.731043	0.489123	1.17789	1.51756
PPAT	phosphoribosyl pyrophosphate amidotransferase		1.25358	1.31542	2.26266	2.25166	1.10779	0.900717	1.81182	2.6816
GSTT3	glutathione S-transferase, theta 3		1.0899	0.855719	2.68001	1.6043	1.01876	1.01302	1.67199	1.6649
CYP39A1	cytochrome P450, family 39, subfamily a, polypeptide 1		1.01992	0.774938	2.02331	2.06622	1.24329	0.505053	1.15561	1.3313
ASS1	argininosuccinate synthetase 1		1.10544	0.540996	1.29343	1.63455	0.827751	1.00229	1.32539	2.13074
GPX3	glutathione peroxidase 3		0.995529	1.36244	1.44457	4.15737	1.12702	1.07537	1.1916	1.41588
SLC43A1	solute carrier family 43, member 1		1.56146	1.48529	2.57422	1.92485	1.1466	1.06065	2.31704	2.33747
SLC1A4	solute carrier family 1 (glutamate/neutral amino acid transporter), member 4		0.849301	1.06211	2.17174	2.04062	0.966006	0.87827	1.09362	1.17775
GSTA4	glutathione S-transferase, alpha 4		1.09597	1.03224	1.5621	1.98573	1.3695	1.07317	1.59021	2.31437
CTH	cystathionase (cystathionine gamma-lyase)		0.937419	1.03887	1.49652	1.56018	0.820452	0.770202	1.23303	1.52503
GSTM2	glutathione S-transferase, mu 2		0.965191	0.84487	1.81411	1.12568	1.01169	0.930342	1.6784	1.46115
FH1	fumarate hydratase 1		1.02735	1.04173	1.54222	1.46433	0.904426	0.894354	1.2712	1.71798
AGXT	alanine-glyoxylate aminotransferase		0.849424	1.07915	1.41268	1.33917	0.781382	0.841105	1.25154	1.49796
ACOT2	acyl-CoA thioesterase 2		0.636719	1.12344	1.37551	1.94353	0.62283	0.692236	0.688856	0.69104
CHRNB2	cholinergic receptor, nicotinic, beta polypeptide 2 (neuronal)		1.06368	0.933528	1.67092	1.41943	1.15789	1.13443	1.48858	1.86731
GLS2	glutaminase 2 (liver, mitochondrial)		1.09922	0.956109	1.44317	1.59855	1.05416	0.958868	1.42981	1.62949
AASS	aminoadipate-semialdehyde synthase		0.916062	1.04186	1.50713	1.31551	0.791759	0.823318	1.14782	1.36462
GM16379	predicted pseudogene 16379		0.863864	1.10429	1.57318	1.38208	1.2792	0.982543	1.68406	1.62413
ALAS1	aminolevulinic acid synthase 1		1.24522	1.14393	1.7638	1.62535	1.11701	1.19682	1.67749	1.69392
SLC25A15	solute carrier family 25 (mitochondrial carrier ornithine transporter), member 15		0.909672	0.995857	1.31123	1.30234	0.837369	0.792271	1.05893	1.38375
EHHADH	enoyl-Coenzyme A, hydratase/3-hydroxyacyl Coenzyme A dehydrogenase		0.492708	1.16406	1.19594	1.20239	0.435475	0.587098	0.650261	0.715695
OAT	ornithine aminotransferase		0.944315	0.962521	1.46216	1.19727	0.768756	0.920848	1.19485	1.19355
GSTT2	glutathione S-transferase, theta 2		1.06979	1.1809	1.46014	1.2048	0.877218	0.749611	1.32825	1.30204
PCK1	phosphoenolpyruvate carboxykinase 1, cytosolic		0.656924	0.770733	0.999257	0.975789	0.735192	0.617606	0.749439	1.05594
GCAT	glycine C-acetyltransferase (2-amino-3-ketobutyrate-coenzyme A ligase)		1.03338	1.08157	1.32847	1.24031	0.960161	0.928011	1.43343	1.41434
ETNK2	ethanolamine kinase 2		1.05637	1.07721	1.36946	1.3413	1.07759	0.949701	1.34144	1.57223
SLC7A11	solute carrier family 7 (cationic amino acid transporter, y+ system), member 11		0.930632	0.821976	0.9957	1.93308	0.954113	0.888499	0.899604	0.992788
GNMT	glycine N-methyltransferase		1.00836	1.00056	1.40836	1.14869	0.938686	0.887381	1.25809	1.31273
NQO1	NAD(P)H dehydrogenase, quinone 1		1.50558	1.13767	1.73521	1.87953	0.915931	0.98427	0.989609	1.39859
CCBL1	cysteine conjugate-beta lyase 1		1.00562	1.03471	1.41555	1.34968	1.05416	0.872734	1.20265	1.26166
BCKDHB	branched chain ketoacid dehydrogenase E1, beta polypeptide		1.00595	1.1173	1.3961	1.2842	0.904539	0.966176	1.35824	1.22195
GLDC	glycine decarboxylase		0.887775	1.03143	1.3086	1.18548	0.817974	0.78218	0.961367	1.14556
GSTK1	glutathione S-transferase kappa 1		0.887757	1.07452	1.39982	1.36953	0.972763	1.06996	1.22346	1.23831
TAT	tyrosine aminotransferase		0.74332	0.994562	1.08582	1.13355	0.814174	0.716269	0.921754	1.10827
IVD	isovaleryl coenzyme A dehydrogenase		1.00504	1.08816	1.25997	1.28379	0.868951	0.851084	1.14644	1.26565
SLC16A10	solute carrier family 16 (monocarboxylic acid transporters), member 10		0.902985	1.04265	1.31449	1.27782	0.987731	0.982433	1.08939	1.39006
PNPLA6	patatin-like phospholipase domain containing 6		0.962475	1.03438	1.33671	1.1422	1.0318	0.951848	1.27179	1.35501
AOC2	amine oxidase, copper containing 2 (retina-specific)		0.875913	1.06163	1.09892	0.958475	0.732452	0.856329	0.997974	1.45201
DDC	dopa decarboxylase		0.885589	1.16709	1.19017	1.09062	0.65157	0.659968	0.815622	1.19669
HAL	histidine ammonia lyase		1.15095	1.0541	1.29065	1.30954	0.986395	0.945157	1.23128	1.44511
GGT6	gamma-glutamyltransferase 6		1.03833	1.0372	1.28079	1.26761	1.15756	1.03869	1.58107	1.30742
PSAT1	phosphoserine aminotransferase 1		1.04306	0.96317	0.996829	1.67071	0.650183	0.724029	0.873735	0.735592
QDPR	quinoid dihydropteridine reductase		1.02377	1.00974	1.24303	1.11268	0.887807	0.902237	1.24483	1.11651
BC026590	cDNA sequence BC026590		1.12102	1.07902	1.18236	1.39623	1.29668	1.11407	1.47889	1.61645
PAH	phenylalanine hydroxylase		1.0686	1.05717	1.31137	1.21966	1.02503	0.996923	1.28033	1.27566
SLC43A2	solute carrier family 43, member 2		1.02609	1.1144	1.19559	1.32812	1.03656	0.83485	1.0652	1.32945
OXCT2B	3-oxoacid CoA transferase 2B		0.591054	0.613037	0.746147	0.829976	0.691282	0.864064	0.857582	0.947394
ACSL5	acyl-CoA synthetase long-chain family member 5		0.811168	0.950276	1.05882	1.0117	0.750038	0.820959	1.03323	0.978238
ARG1	arginase, liver		0.901649	0.927841	1.17047	1.00463	0.842375	0.839899	1.00962	1.11191
HPDL	4-hydroxyphenylpyruvate dioxygenase-like		1.06963	1.13826	1.16847	1.20334	1.05376	0.941978	1.26441	1.48108
KYNU	kynureninase (L-kynurenine hydrolase)		1.00403	0.8934	1.13831	1.14182	0.869805	0.871895	0.971425	1.15501
SULT1A1	sulfotransferase family 1A, phenol-preferring, member 1		0.892008	0.820011	1.22628	0.805776	0.839854	0.790279	1.0225	0.991423
HIBADH	3-hydroxyisobutyrate dehydrogenase		0.932085	1.01685	1.25106	1.14208	0.899074	1.08637	1.19516	1.17151
DBT	dihydrolipoamide branched chain transacylase E2		1.03201	1.1327	1.34171	1.2194	0.980723	0.973722	1.16991	1.23617
MDH2	malate dehydrogenase 2, NAD (mitochondrial)		1.02203	1.06166	1.14384	1.40322	0.997474	0.935367	1.08957	1.20221
SLC38A2	solute carrier family 38, member 2		0.766514	0.78158	1.04732	1.0468	0.784036	0.66297	0.564109	0.9487
HPD	4-hydroxyphenylpyruvic acid dioxygenase		0.968411	1.05455	1.26294	1.14185	0.996016	0.974936	1.16343	1.24002
UROC1	urocanase domain containing 1		1.04082	1.03068	1.27053	1.15	1.03954	0.987099	1.21853	1.28169
ACAT2	acetyl-Coenzyme A acetyltransferase 2		0.945201	1.10516	1.18807	1.25167	0.951027	0.926396	1.22198	1.05207
SLC3A2	solute carrier family 3 (activators of dibasic and neutral amino acid transport), member 2		1.02657	1.02774	1.22024	1.34083	1.0559	1.13946	1.20271	1.33386
HSD17B10	hydroxysteroid (17-beta) dehydrogenase 10		0.862614	1.04979	1.2863	1.05883	0.776335	0.853028	0.964717	0.932164
ASPA	aspartoacylase		0.855818	1.01934	1.32393	0.967496	0.904139	0.896821	1.00559	1.10352
ASL	argininosuccinate lyase		0.962297	0.910352	1.12742	0.96373	0.862706	0.791392	0.969782	1.14802
PSMD9	proteasome (prosome, macropain) 26S subunit, non-ATPase, 9		0.934973	0.896233	1.02409	1.1014	0.877597	0.681452	0.845877	1.07307
PDPR	pyruvate dehydrogenase phosphatase regulatory subunit		0.94413	1.06804	1.20229	1.11353	0.893713	0.850138	1.03928	1.11973
DLD	dihydrolipoamide dehydrogenase		0.919626	1.12037	1.22022	1.10873	0.897429	0.996659	1.21642	1.13949
ABAT	4-aminobutyrate aminotransferase		1.00753	1.11075	1.19134	1.16342	0.779769	0.848547	1.07067	1.02615
PFAS	phosphoribosylformylglycinamidine synthase (FGAR amidotransferase)		1.22512	1.13459	1.23409	1.29259	1.09403	0.898024	1.22484	1.41583
PARS2	prolyl-tRNA synthetase (mitochondrial)(putative)		1.0705	1.00264	1.26297	1.14896	0.959849	0.904377	1.05839	1.19831
GMPS	guanine monophosphate synthetase		0.995486	1.04475	1.19234	1.05712	0.88395	1.00917	1.186	1.22266
ALDH6A1	aldehyde dehydrogenase family 6, subfamily A1		0.919116	1.06285	1.27781	1.13054	0.965169	1.11961	1.22836	1.17916
CPS1	carbamoyl-phosphate synthetase 1		0.949426	1.00673	1.14928	1.12906	0.974602	0.934879	1.15108	1.146
OGDH	oxoglutarate dehydrogenase (lipoamide)		1.03639	1.05625	1.19847	1.21956	1.09994	0.957556	1.19417	1.28775
PRODH	proline dehydrogenase		1.10649	1.04028	1.30683	1.09684	1.10972	0.972802	1.28619	1.29631
GFPT1	glutamine fructose-6-phosphate transaminase 1		0.935973	1.13935	1.10989	1.17174	0.798242	0.944928	1.01842	1.18135
SLC38A4	solute carrier family 38, member 4		0.934073	0.978697	1.15735	1.17071	0.963415	0.973264	1.08612	1.10054
VARS2	valyl-tRNA synthetase 2, mitochondrial (putative)		1.0508	1.10318	1.11139	1.31904	1.10014	1.0337	1.2532	1.34114
CTPS2	cytidine 5'-triphosphate synthase 2		1.05297	0.984201	1.09732	1.19901	0.864398	0.733749	0.939602	1.01722
AGPAT6	1-acylglycerol-3-phosphate O-acyltransferase 6 (lysophosphatidic acid acyltransferase, zeta)		0.977294	1.01028	1.2582	1.02708	0.862034	0.720723	0.877998	1.0074
ACADSB	acyl-Coenzyme A dehydrogenase, short/branched chain		0.919587	1.18019	1.30922	1.14798	0.987943	1.09478	1.24355	1.18418
ODC1	ornithine decarboxylase, structural 1		1.00571	1.16827	1.16881	1.10588	0.858223	0.917616	1.14314	1.19351
SLC22A5	solute carrier family 22 (organic cation transporter), member 5		0.750145	1.04189	1.20021	1.02407	0.767901	0.706028	0.770905	0.810046
CTPS	cytidine 5'-triphosphate synthase		0.906545	1.24125	1.0942	1.0688	0.813903	0.754195	0.92745	1.22768
HGD	homogentisate 1, 2-dioxygenase		0.923843	0.962108	1.13448	1.0708	1.0199	0.954481	1.14895	1.12943
MDH1	malate dehydrogenase 1, NAD (soluble)		0.979455	1.03736	1.18136	1.0962	0.884284	0.973048	1.09406	1.12288
ACO2	aconitase 2, mitochondrial		0.926296	1.00972	1.12914	1.06681	0.86234	0.802528	0.978439	1.00236
RARS2	arginyl-tRNA synthetase 2, mitochondrial		1.10103	1.14954	1.3159	1.02959	1.00979	0.970324	1.18608	1.37513
MCCC1	methylcrotonoyl-Coenzyme A carboxylase 1 (alpha)		0.974617	1.09149	1.19861	1.10971	0.799817	0.843109	0.907166	1.07585
ALDH4A1	aldehyde dehydrogenase 4 family, member A1		0.979602	1.13242	1.23629	1.1553	0.950271	0.88563	1.0576	1.11853
HTATIP2	HIV-1 tat interactive protein 2, homolog (human)		0.963633	0.992182	1.25969	1.19509	0.795759	0.918697	0.956825	0.828637
KLK1B8	kallikrein 1-related peptidase b8		0.832255	0.873355	1.15713	0.986518	0.978278	0.966168	0.878883	1.19357
MLYCD	malonyl-CoA decarboxylase		0.986135	1.04004	1.1143	1.11585	0.936116	0.855725	1.13745	1.0397
ALDH7A1	aldehyde dehydrogenase family 7, member A1		0.974947	1.03313	1.16964	1.15845	1.00213	1.02325	1.17941	1.14794
SLC7A8	solute carrier family 7 (cationic amino acid transporter, y+ system), member 8		1.14879	1.27623	1.01052	1.75627	1.28303	1.30907	1.37561	1.6296
SDHD	succinate dehydrogenase complex, subunit D, integral membrane protein		1.12011	1.01628	1.18026	1.05817	1.01499	0.970889	1.20634	1.29541
ADSSL1	adenylosuccinate synthetase like 1		1.06517	1.12286	1.12619	1.17188	1.09122	0.847153	1.24791	1.19841
ACY1	aminoacylase 1		0.939999	0.964016	1.09749	1.02125	0.990771	0.874692	1.17949	1.03324
PYCR2	pyrroline-5-carboxylate reductase family, member 2		1.21583	1.14403	1.26048	1.35587	1.07498	1.1128	1.2895	1.31893
AHCY	S-adenosylhomocysteine hydrolase		0.977403	0.910508	1.27112	0.91238	0.748758	0.837703	0.838859	0.960379
CCBL2	cysteine conjugate-beta lyase 2		0.859053	1.01731	0.997746	1.04789	0.875581	0.985858	1.00105	1.23659
MAOA	monoamine oxidase A		0.984223	0.867708	1.04514	1.09965	0.990797	0.739232	1.00671	0.95294
LARS	leucyl-tRNA synthetase		1.08702	1.19668	1.09252	1.15086	0.862707	0.747961	0.964152	1.25136
MAOB	monoamine oxidase B		0.923856	1.00372	1.22605	1.08389	0.940113	1.02049	1.0888	1.04975
SUCLG1	succinate-CoA ligase, GDP-forming, alpha subunit		0.874711	1.06875	1.08464	1.00933	0.8124	0.800251	0.949305	1.02219
TGFB2	transforming growth factor, beta 2		0.643653	0.887384	0.807205	1.05825	0.876459	0.757993	0.928454	0.824716
OTC	ornithine transcarbamylase		0.834276	0.991728	1.15833	1.00857	0.963465	1.21572	1.25865	1.15037
TDO2	tryptophan 2,3-dioxygenase		0.814482	1.00277	1.16689	1.05462	0.933122	1.00467	1.0133	1.0459
MCCC2	methylcrotonoyl-Coenzyme A carboxylase 2 (beta)		0.885952	1.12478	1.16155	0.994217	0.822693	0.857557	1.00578	1.04163
AZIN1	antizyme inhibitor 1		1.06649	0.94686	1.15325	0.973784	0.946769	0.824606	1.01039	1.17235
ADSS	adenylosuccinate synthetase, non muscle		1.05664	1.07271	1.14458	1.29299	0.937094	0.953959	1.08056	1.05827
GCH1	GTP cyclohydrolase 1		0.819847	0.877585	1.24082	0.767128	0.99994	0.974773	1.011	1.15511
IARS2	isoleucine-tRNA synthetase 2, mitochondrial		1.04682	1.03531	1.12338	1.19465	1.07196	1.02145	1.17054	1.25759
PDHX	pyruvate dehydrogenase complex, component X		1.04793	1.04458	1.16605	1.07583	0.93201	0.953908	0.98086	1.2975
SDHA	succinate dehydrogenase complex, subunit A, flavoprotein (Fp)		1.01975	1.04162	1.18004	1.08206	0.909677	0.95729	1.07968	1.11743
BCHE	butyrylcholinesterase		0.929406	0.98117	1.20537	0.951158	0.806805	0.915013	0.956096	1.00667
GPT	glutamic pyruvic transaminase, soluble		0.969595	1.07801	1.16045	1.04332	0.867607	0.794193	0.977703	1.02505
SMOX	spermine oxidase		0.845551	1.01694	0.884214	1.1474	0.880614	0.89251	0.959885	1.1241
PLA2G5	phospholipase A2, group V		0.879312	0.88036	1.13725	1.13088	0.966292	1.23398	1.32482	0.886516
SLC7A10	solute carrier family 7 (cationic amino acid transporter, y+ system), member 10		0.790316	0.747965	0.955164	0.915745	0.870938	0.930571	1.01099	0.895346
SARDH	sarcosine dehydrogenase		1.03297	1.0815	1.21053	1.09113	0.975823	0.990446	1.10584	1.20664
GSR	glutathione reductase		1.08179	1.07093	1.18225	1.2154	0.998223	1.08173	1.12026	1.26445
SLC27A1	solute carrier family 27 (fatty acid transporter), member 1		0.674338	1.33807	1.1402	1.06698	0.612486	0.623753	0.698797	0.761535
DCT	dopachrome tautomerase		1.03121	1.12844	1.23964	1.01815	0.807869	0.804283	0.995916	1.00179
AOC3	amine oxidase, copper containing 3		1.10937	0.976519	1.38882	1.07964	1.2042	1.17054	1.34175	1.22217
SLC36A1	solute carrier family 36 (proton/amino acid symporter), member 1		1.15197	1.07497	1.01858	1.22988	1.12871	1.00991	1.36782	1.28589
QPRT	quinolinate phosphoribosyltransferase		1.06176	1.00214	1.07818	1.22346	1.01456	0.976716	1.05238	1.19901
P4HA2	procollagen-proline, 2-oxoglutarate 4-dioxygenase (proline 4-hydroxylase), alpha II polypeptide		1.02549	1.22894	1.17477	1.26648	1.16979	1.03506	0.970256	1.58971
HEMK1	HemK methyltransferase family member 1		1.17227	0.961863	1.11102	1.10009	0.968578	0.8561	0.969801	1.2564
PSMB7	proteasome (prosome, macropain) subunit, beta type 7		0.978044	1.01288	1.1403	1.01991	0.8382	0.878613	0.99891	0.996177
DLST	dihydrolipoamide S-succinyltransferase (E2 component of 2-oxo-glutarate complex)		1.01041	1.06913	1.11454	1.07922	0.819437	0.851607	1.00838	1.0002
GLUD1	glutamate dehydrogenase 1		0.974984	0.999252	1.12522	1.13614	1.11678	1.04372	1.16301	1.20745
MUT	methylmalonyl-Coenzyme A mutase		0.988263	1.03882	1.11957	1.07906	0.82605	0.871273	0.973606	0.997426
GSTM1	glutathione S-transferase, mu 1		1.12837	0.915156	1.185	1.38886	1.26786	1.16553	1.19188	1.24623
BDH2	3-hydroxybutyrate dehydrogenase, type 2		1.35104	1.10467	1.20644	0.983377	1.00117	1.017	1.41511	1.39451
SARS	seryl-aminoacyl-tRNA synthetase		1.01949	0.986863	1.00538	1.1363	0.943395	0.800526	0.948685	1.10004
BCKDHA	branched chain ketoacid dehydrogenase E1, alpha polypeptide		0.935877	1.04085	1.15916	1.07438	0.912014	0.859804	0.897615	1.05087
SLC6A3	solute carrier family 6 (neurotransmitter transporter, dopamine), member 3		0.937736	1.11885	1.23884	1.12939	1.24776	1.12442	1.22897	1.33796
OXCT1	3-oxoacid CoA transferase 1		0.965152	1.19417	1.09795	1.21173	1.01987	1.07691	0.946499	1.4849
ACOT7	acyl-CoA thioesterase 7		1.00773	0.927851	1.01402	1.07636	0.847487	0.787006	0.921333	0.964072
AGXT2	alanine-glyoxylate aminotransferase 2		0.976352	1.0997	1.14745	1.05007	0.736838	0.957569	0.985722	1.01061
AUH	AU RNA binding protein/enoyl-coenzyme A hydratase		0.986604	1.03803	1.23957	1.05145	1.02494	1.08472	1.21734	1.08977
GARS	glycyl-tRNA synthetase		1.05441	1.11334	1.10657	1.2055	0.947825	0.847327	0.89725	1.19636
HPRT	hypoxanthine guanine phosphoribosyl transferase		0.956105	1.1252	1.16429	1.1493	0.86126	0.951703	1.03474	0.975703
ALDH3B1	aldehyde dehydrogenase 3 family, member B1		1.3869	1.04986	1.31093	1.80172	1.63165	1.35337	1.18811	1.71562
AMDHD1	amidohydrolase domain containing 1		1.09196	0.988169	1.16767	1.14493	1.09855	0.969098	1.12577	1.16336
CARS	cysteinyl-tRNA synthetase		0.960814	1.0927	1.06233	1.16832	0.986135	0.911345	0.884048	1.26859
DRD2	dopamine receptor D2		0.772714	0.971942	1.18669	0.917085	1.07594	0.926344	1.117	0.934283
UPB1	ureidopropionase, beta		0.960809	1.08222	1.10402	0.984399	0.871208	0.811513	1.01647	1.02021
CBS	cystathionine beta-synthase		0.992687	1.06664	1.13883	1.17233	1.06004	0.859239	0.964737	1.12869
DMGDH	dimethylglycine dehydrogenase precursor		0.950407	1.10809	1.13459	0.908612	0.79877	0.933426	1.12543	1.02042
CHDH	choline dehydrogenase		0.907508	0.926228	0.962199	1.0642	0.949869	0.913383	0.980562	1.07647
PSMA8	proteasome (prosome, macropain) subunit, alpha type, 8		1.16975	0.829176	1.36883	0.924623	0.958296	0.965741	1.06052	0.974411
MAT1A	methionine adenosyltransferase I, alpha		0.974411	0.984422	1.13741	1.08052	0.991542	0.977875	1.06395	1.05129
EIF5A	eukaryotic translation initiation factor 5A		0.802945	0.946544	0.962443	1.01945	0.94662	0.879075	1.01622	0.932694
NUP62-IL4I1	Nup62-Il4i1 protein		2.07013	1.52617	1.37356	1.464	0.848398	1.09778	1.84533	1.41053
VARS	valyl-tRNA synthetase		1.00642	1.06329	1.06817	1.10047	0.986405	0.954152	0.987841	1.24673
LAP3	leucine aminopeptidase 3		1.0076	0.995135	1.08518	1.01112	0.930682	1.02452	1.04947	1.18026
PRODH2	proline dehydrogenase (oxidase) 2		1.02237	1.08587	1.11135	1.06305	0.89741	0.861492	0.996164	1.05232
AKR1A4	aldo-keto reductase family 1, member A4 (aldehyde reductase)		1.02998	1.01769	1.10799	1.16334	1.01989	1.05094	1.07445	1.1501
YARS2	tyrosyl-tRNA synthetase 2 (mitochondrial)		0.967741	0.992674	1.05976	1.00613	0.859551	0.959066	0.906414	1.15231
HDC	histidine decarboxylase		1.21767	1.24512	1.35288	1.26245	1.16026	1.29606	1.37057	1.3714
GPX1	glutathione peroxidase 1		0.91645	1.06795	1.11976	1.12894	1.04404	1.09753	1.12433	1.11702
CKM	creatine kinase, muscle		1.00761	0.921769	0.945655	1.10281	1.01224	1.17938	1.08563	1.34845
CGA	glycoprotein hormones, alpha subunit		1.05088	1.01832	1.21165	1.15971	1.18994	0.950305	1.00636	1.18741
CARNS1	carnosine synthase 1		0.866761	0.922263	0.930575	1.05998	0.875126	0.941608	0.983488	0.9355
MARS2	methionine-tRNA synthetase 2 (mitochondrial)		1.10913	1.21065	1.16124	1.21839	1.05809	1.01053	1.19763	1.16031
CHPT1	choline phosphotransferase 1		0.866519	0.999623	1.13783	0.960952	0.931136	1.09132	1.07666	1.02102
PRG3	proteoglycan 3		1.01117	0.890818	1.08126	1.14878	1.07633	1.02788	1.13253	0.960329
GPT2	glutamic pyruvate transaminase (alanine aminotransferase) 2		0.960941	0.983388	1.06321	0.956135	0.816663	0.860971	0.930553	0.957813
P4HA1	procollagen-proline, 2-oxoglutarate 4-dioxygenase (proline 4-hydroxylase), alpha 1 polypeptide		1.28451	1.23513	1.35392	1.32278	1.23015	1.38985	1.13977	1.7197
ASNSD1	asparagine synthetase domain containing 1		0.893514	0.876235	1.01319	0.865238	0.932203	1.04736	1.18796	0.958485
BHMT	betaine-homocysteine methyltransferase		0.703518	0.912484	1.51073	0.948914	0.829112	1.80006	1.01532	1.08215
ACADM	acyl-Coenzyme A dehydrogenase, medium chain		0.885106	0.997886	1.00015	1.02966	0.810626	0.842884	0.826474	0.936919
PYCR1	pyrroline-5-carboxylate reductase 1		0.974517	0.894066	0.966288	1.09155	0.951417	0.886372	1.07229	0.844845
GPX4	glutathione peroxidase 4		1.05819	0.64033	0.792398	0.725346	0.72595	0.647148	0.79375	0.980443
FOXE3	forkhead box E3		1.05624	1.05799	1.07346	1.22873	1.0037	1.11476	1.26655	0.967071
SLC5A7	solute carrier family 5 (choline transporter), member 7		0.988732	0.770774	1.01317	0.986417	0.984826	0.94903	0.958242	0.994416
PADI2	peptidyl arginine deiminase, type II		0.794146	0.82909	0.927479	0.903175	0.919051	0.987014	1.08957	0.855475
AARS	alanyl-tRNA synthetase		0.979006	1.07243	1.05689	1.06697	0.961704	1.04587	1.00823	1.20949
SARS2	seryl-aminoacyl-tRNA synthetase 2		0.995255	1.18357	1.05258	1.20241	0.969116	0.977642	0.964982	1.19137
AMT	aminomethyltransferase		1.03986	0.992453	1.15125	1.03387	0.885693	0.86832	0.950122	0.910345
DRD4	dopamine receptor D4		1.11996	1.07435	1.09022	1.2482	1.10084	1.36406	1.49685	1.12967
ALDH5A1	aldhehyde dehydrogenase family 5, subfamily A1		0.972747	0.972965	1.1149	0.99782	0.954736	0.9356	0.993144	0.977518
EPRS	glutamyl-prolyl-tRNA synthetase		1.01111	1.10733	1.03112	0.987995	0.847543	0.859314	0.939653	1.11223
MTHFD1	methylenetetrahydrofolate dehydrogenase (NADP+ dependent), methenyltetrahydrofolate cyclohydrolase, formyltetrahydrofolate synthase		1.01479	1.02247	1.06583	0.95738	0.843576	0.844882	0.970254	0.966057
GSS	glutathione synthetase		1.02126	1.02252	0.993661	1.068	0.962104	0.817128	0.940777	1.05709
SRR	serine racemase		0.854469	0.903562	1.00496	0.981983	0.983723	1.06983	0.968082	1.08527
NAGS	N-acetylglutamate synthase		1.10352	1.21113	1.17034	1.23926	1.12558	1.06149	1.02368	1.33533
DOHH	deoxyhypusine hydroxylase/monooxygenase		1.12019	1.00455	1.02328	0.870265	0.864332	0.803149	0.954437	1.16797
TXNRD3	thioredoxin reductase 3		0.888766	1.0072	0.97131	0.909526	1.08282	0.82572	0.913661	1.23243
GRIN2A	glutamate receptor, ionotropic, NMDA2A (epsilon 1)		1.04702	1.15432	1.04627	1.09318	0.853104	1.19981	1.23879	1.12129
DDAH1	dimethylarginine dimethylaminohydrolase 1		1.03753	1.08935	1.14811	1.30509	1.26348	1.31056	1.27977	1.23617
NARS2	asparaginyl-tRNA synthetase 2 (mitochondrial)(putative)		1.01712	1.08776	1.06175	1.08501	0.910995	1.02961	0.977057	1.14628
GGT5	gamma-glutamyltransferase 5		0.90577	0.963655	1.03748	1.16178	0.935926	0.851832	0.7322	0.918664
NR4A2	nuclear receptor subfamily 4, group A, member 2		1.09682	1.27151	1.06349	1.36114	1.14972	1.31881	1.36795	1.29264
VHL	von Hippel-Lindau tumor suppressor		1.07047	1.17055	1.19818	1.06383	1.00213	1.00866	0.974703	1.22664
SLC22A4	solute carrier family 22 (organic cation transporter), member 4		1.13868	1.18102	1.25419	1.11172	1.02568	1.06486	1.21069	1.04549
PEMT	phosphatidylethanolamine N-methyltransferase		1.05423	1.01009	1.04522	1.17376	1.14626	1.06552	1.12936	1.13155
HNF4A	hepatic nuclear factor 4, alpha		1.02782	1.01575	1.07672	1.07337	1.07035	0.932558	1.00051	1.08647
PARK2	Parkinson disease (autosomal recessive, juvenile) 2, parkin		1.08649	1.02554	1.1161	0.97607	1.04877	1.06035	1.18963	1.13658
CACNA1A	calcium channel, voltage-dependent, P/Q type, alpha 1A subunit		0.97368	0.908032	0.99915	0.983861	1.05561	0.860522	1.05846	0.931016
CPT1C	carnitine palmitoyltransferase 1c		1.19065	0.983086	1.04729	1.21831	1.05027	1.10517	1.23206	1.02216
PCYOX1L	prenylcysteine oxidase 1 like		1.10784	1.17049	1.11177	1.28151	1.04768	0.979889	1.05913	1.03871
MARS	methionine-tRNA synthetase		1.09381	1.12948	1.05742	1.1771	1.05845	0.950561	1.06405	1.11293
CKMT1	creatine kinase, mitochondrial 1, ubiquitous		0.866974	0.893236	0.93631	0.995996	1.24765	0.979127	1.24002	0.981169
HTT	huntingtin		1.05835	1.13883	1.11086	1.07903	1.06737	0.962879	1.03557	1.17389
OAZ3	ornithine decarboxylase antizyme 3		1.1593	1.0728	1.06817	1.09192	1.15945	1.03607	1.19324	1.24637
DHPS	deoxyhypusine synthase		1.02717	0.903003	0.894607	0.997689	0.963997	0.796836	0.971314	0.970452
GGT7	gamma-glutamyltransferase 7		1.06316	1.11426	1.16476	1.13684	1.06511	0.996558	1.03416	1.06752
ENOPH1	enolase-phosphatase 1		0.948527	0.907695	0.981637	0.939118	0.935636	0.873559	0.895224	0.989953
GGT1	gamma-glutamyltransferase 1		0.961182	0.846377	0.913519	1.1914	1.02072	1.0762	1.06931	0.872876
GFPT2	glutamine fructose-6-phosphate transaminase 2		1.05665	1.04094	0.988964	1.02672	1.12132	0.913444	1.07027	1.18991
HAGH	hydroxyacyl glutathione hydrolase		1.09419	1.07372	1.06409	1.05901	1.00985	0.979161	1.02039	1.15673
RARS	arginyl-tRNA synthetase		1.18868	1.19444	1.09686	1.21271	0.9731	1.00954	1.0641	1.13805
SLC6A8	solute carrier family 6 (neurotransmitter transporter, creatine), member 8		1.20241	0.868983	0.895598	1.43486	1.33507	0.969069	0.919011	1.2558
ATP7A	ATPase, Cu++ transporting, alpha polypeptide		1.04279	1.20632	1.16538	1.01395	0.992684	0.977246	0.881267	1.27865
TACR3	tachykinin receptor 3		1.03351	1.05385	1.1811	1.25382	1.28492	0.99111	1.07023	0.971998
CLN3	ceroid lipofuscinosis, neuronal 3, juvenile (Batten, Spielmeyer-Vogt disease)		1.05097	1.0609	0.954324	1.31525	1.27624	1.1164	1.16021	1.19151
TH	tyrosine hydroxylase		1.05891	1.22973	1.09669	1.37733	1.0175	1.33871	1.26812	1.0112
SRM	spermidine synthase		1.16986	1.25768	0.96518	1.19522	1.14629	1.18704	1.31031	1.3783
AANAT	arylalkylamine N-acetyltransferase		1.40361	0.984203	1.29057	1.31042	1.31542	1.27475	1.47092	0.972789
GATM	glycine amidinotransferase (L-arginine:glycine amidinotransferase)		1.25043	1.30353	0.951693	1.5452	1.52688	1.62578	1.35441	1.82632
ADC	arginine decarboxylase		1.45829	1.25951	1.57137	1.3782	1.53029	1.53496	1.5703	1.13225

## Sheet: TCA_cycle
Gene name	description		LF-NP_1W	HF-NP_1W	LF-HP_1W	HF-HP_1W	LF-NP_12W	HF-NP_12W	LF-HP_12W	HF-HP_12W
ACMSD	amino carboxymuconate semialdehyde decarboxylase		0.757483	0.990793	2.56981	2.81805	0.621655	0.473397	1.89273	3.09719
PPARGC1A	peroxisome proliferative activated receptor, gamma, coactivator 1 alpha		0.654147	0.68595	1.67186	1.96996	0.753056	0.523824	1.21364	2.4717
GOT1	glutamate oxaloacetate transaminase 1, soluble		0.931644	0.863746	1.66962	1.62075	0.731043	0.489123	1.17789	1.51756
MTHFD1L	methylenetetrahydrofolate dehydrogenase (NADP+ dependent) 1-like		1.01999	1.0487	1.27654	2.40448	1.34224	1.0657	1.60916	2.69197
IDH2	isocitrate dehydrogenase 2 (NADP+), mitochondrial		0.977776	1.05693	1.52604	1.55191	0.939687	0.872068	1.35989	1.63667
FH1	fumarate hydratase 1		1.02735	1.04173	1.54222	1.46433	0.904426	0.894354	1.2712	1.71798
ACOT3	acyl-CoA thioesterase 3		0.50021	0.982665	1.7083	1.20997	0.581308	0.880562	0.903034	0.716176
ACOT2	acyl-CoA thioesterase 2		0.636719	1.12344	1.37551	1.94353	0.62283	0.692236	0.688856	0.69104
FMO2	flavin containing monooxygenase 2		1.14931	1.24173	2.55997	1.35466	0.870316	0.707652	1.08516	0.991659
IDH3A	isocitrate dehydrogenase 3 (NAD+) alpha		0.969869	1.02356	1.39146	1.37694	0.822884	0.825503	1.13632	1.4596
ALAS1	aminolevulinic acid synthase 1		1.24522	1.14393	1.7638	1.62535	1.11701	1.19682	1.67749	1.69392
EHHADH	enoyl-Coenzyme A, hydratase/3-hydroxyacyl Coenzyme A dehydrogenase		0.492708	1.16406	1.19594	1.20239	0.435475	0.587098	0.650261	0.715695
PCK1	phosphoenolpyruvate carboxykinase 1, cytosolic		0.656924	0.770733	0.999257	0.975789	0.735192	0.617606	0.749439	1.05594
GNMT	glycine N-methyltransferase		1.00836	1.00056	1.40836	1.14869	0.938686	0.887381	1.25809	1.31273
PDSS1	prenyl (solanesyl) diphosphate synthase, subunit 1		0.964866	1.05851	1.02251	1.2644	0.913071	0.786421	1.27342	1.41141
ACNAT2	acyl-coenzyme A amino acid N-acyltransferase 2		0.762677	0.757144	2.22668	1.43027	1.30582	1.21694	0.886474	0.848385
CBR1	carbonyl reductase 1		0.887363	0.79304	1.26608	1.20137	0.904717	0.693069	0.839804	1.02791
HMGCR	3-hydroxy-3-methylglutaryl-Coenzyme A reductase		0.694781	1.00218	0.767082	1.35882	0.734697	0.693901	0.963256	0.991246
TAT	tyrosine aminotransferase		0.74332	0.994562	1.08582	1.13355	0.814174	0.716269	0.921754	1.10827
NDUFA5	NADH dehydrogenase (ubiquinone) 1 alpha subcomplex, 5		1.13716	1.09419	1.47836	1.13707	0.919065	0.829893	1.23813	1.29018
PMVK	phosphomevalonate kinase		0.856866	1.12089	0.94125	1.27495	0.725801	0.760061	1.14781	1.10642
CYCS	cytochrome c, somatic		0.673704	0.973778	0.95309	0.816738	0.613072	0.469719	0.715806	0.968942
NMNAT1	nicotinamide nucleotide adenylyltransferase 1		0.982177	0.963613	1.18307	1.39429	1.04223	0.916781	1.10904	1.24483
DCXR	dicarbonyl L-xylulose reductase		0.946884	1.08772	1.31146	1.1421	0.933374	0.937588	1.17561	1.30056
UQCRH	ubiquinol-cytochrome c reductase hinge protein		1.11955	0.982565	1.27682	1.32871	1.06838	1.03948	1.2175	1.46544
ALDH1L1	aldehyde dehydrogenase 1 family, member L1		0.970011	1.04163	1.26015	1.16876	0.964035	0.934036	1.25574	1.20317
SDHB	succinate dehydrogenase complex, subunit B, iron sulfur (Ip)		1.03158	1.08214	1.23129	1.16251	0.871162	0.875683	1.19874	1.17259
QDPR	quinoid dihydropteridine reductase		1.02377	1.00974	1.24303	1.11268	0.887807	0.902237	1.24483	1.11651
SLC25A12	solute carrier family 25 (mitochondrial carrier, Aralar), member 12		1.2132	1.22183	1.52269	1.5979	1.34842	1.21168	1.51401	1.50606
GYG	glycogenin		0.872199	0.972553	1.02439	1.36694	0.973987	0.996501	1.08483	1.21295
ACOT4	acyl-CoA thioesterase 4		0.706403	0.923018	1.22659	0.981128	0.623547	0.830406	0.728272	0.849523
SUCLA2	succinate-Coenzyme A ligase, ADP-forming, beta subunit		0.940174	0.983362	1.15704	1.10547	0.911714	0.94693	1.18277	1.19548
PAH	phenylalanine hydroxylase		1.0686	1.05717	1.31137	1.21966	1.02503	0.996923	1.28033	1.27566
FDXR	ferredoxin reductase		0.908814	0.998197	1.05934	1.06422	0.888605	0.728124	0.917367	1.26114
ACSS2	acyl-CoA synthetase short-chain family member 2		1.07641	1.08875	1.08059	1.27337	0.928005	0.844861	1.35405	1.08808
NMNAT2	nicotinamide nucleotide adenylyltransferase 2		0.998864	1.14851	1.12825	1.36344	0.981103	1.17141	1.171	1.57028
PHKA1	phosphorylase kinase alpha 1		1.1727	1.13263	1.296	1.27036	1.02217	0.863635	1.21129	1.32162
MVD	mevalonate (diphospho) decarboxylase		0.630078	1.38718	1.03945	1.518	0.746481	1.30748	1.21173	1.16557
GYS1	glycogen synthase 1, muscle		1.19189	1.37314	1.50351	1.57173	1.25516	1.15317	1.43748	1.51003
KYNU	kynureninase (L-kynurenine hydrolase)		1.00403	0.8934	1.13831	1.14182	0.869805	0.871895	0.971425	1.15501
HIBADH	3-hydroxyisobutyrate dehydrogenase		0.932085	1.01685	1.25106	1.14208	0.899074	1.08637	1.19516	1.17151
GIF	gastric intrinsic factor		0.844752	0.829909	1.14731	0.997562	0.943862	1.02522	1.13897	1.12401
DBT	dihydrolipoamide branched chain transacylase E2		1.03201	1.1327	1.34171	1.2194	0.980723	0.973722	1.16991	1.23617
MDH2	malate dehydrogenase 2, NAD (mitochondrial)		1.02203	1.06166	1.14384	1.40322	0.997474	0.935367	1.08957	1.20221
ENPP1	ectonucleotide pyrophosphatase/phosphodiesterase 1		1.08	0.970361	1.26012	1.2957	1.35948	1.20929	1.44188	1.54289
PYGB	brain glycogen phosphorylase		1.12225	1.22123	0.995272	2.06624	1.36371	1.07206	1.19212	1.4771
PDPR	pyruvate dehydrogenase phosphatase regulatory subunit		0.94413	1.06804	1.20229	1.11353	0.893713	0.850138	1.03928	1.11973
DLD	dihydrolipoamide dehydrogenase		0.919626	1.12037	1.22022	1.10873	0.897429	0.996659	1.21642	1.13949
CPS1	carbamoyl-phosphate synthetase 1		0.949426	1.00673	1.14928	1.12906	0.974602	0.934879	1.15108	1.146
SLC27A3	solute carrier family 27 (fatty acid transporter), member 3		0.986398	1.15246	1.13183	1.38181	1.15443	1.10918	1.28341	1.40936
COQ9	coenzyme Q9 homolog (yeast)		1.0018	0.962152	1.18441	1.11574	0.928907	0.898992	1.04072	1.13877
OGDH	oxoglutarate dehydrogenase (lipoamide)		1.03639	1.05625	1.19847	1.21956	1.09994	0.957556	1.19417	1.28775
COQ3	coenzyme Q3 homolog, methyltransferase (yeast)		0.980335	0.965221	1.11533	1.0255	0.833864	0.882624	1.06094	1.12163
UQCRC1	ubiquinol-cytochrome c reductase core protein 1		0.962398	1.06977	1.18901	1.13951	0.973591	0.92696	1.11322	1.18701
ACOT6	acyl-CoA thioesterase 6		0.786169	1.10944	1.20256	1.20397	1.17756	0.842524	1.10546	1.09398
GFPT1	glutamine fructose-6-phosphate transaminase 1		0.935973	1.13935	1.10989	1.17174	0.798242	0.944928	1.01842	1.18135
PCK2	phosphoenolpyruvate carboxykinase 2 (mitochondrial)		0.989488	0.856735	1.01305	1.22195	0.942833	0.794348	0.975041	0.982704
FASTKD3	FAST kinase domains 3		1.11626	1.04619	1.3553	1.38647	1.31112	0.957554	1.07722	1.3613
AGPAT6	1-acylglycerol-3-phosphate O-acyltransferase 6 (lysophosphatidic acid acyltransferase, zeta)		0.977294	1.01028	1.2582	1.02708	0.862034	0.720723	0.877998	1.0074
ACADSB	acyl-Coenzyme A dehydrogenase, short/branched chain		0.919587	1.18019	1.30922	1.14798	0.987943	1.09478	1.24355	1.18418
COX10	COX10 homolog, cytochrome c oxidase assembly protein, heme A: farnesyltransferase (yeast)		1.0335	1.01455	1.04707	1.18864	0.986438	0.858343	1.16372	1.14175
UQCR10	ubiquinol-cytochrome c reductase, complex III subunit X		0.943464	0.966618	1.16603	0.99976	0.969902	0.845081	1.07395	1.09395
MDH1	malate dehydrogenase 1, NAD (soluble)		0.979455	1.03736	1.18136	1.0962	0.884284	0.973048	1.09406	1.12288
ACO2	aconitase 2, mitochondrial		0.926296	1.00972	1.12914	1.06681	0.86234	0.802528	0.978439	1.00236
FASTKD1	FAST kinase domains 1		1.05456	1.0609	1.13956	1.01858	0.849591	0.866522	1.09294	1.18727
NDUFS1	NADH dehydrogenase (ubiquinone) Fe-S protein 1		1.12952	1.08695	1.20759	1.00237	0.76915	0.797028	1.14738	1.01316
MLYCD	malonyl-CoA decarboxylase		0.986135	1.04004	1.1143	1.11585	0.936116	0.855725	1.13745	1.0397
NMNAT3	nicotinamide nucleotide adenylyltransferase 3		0.921676	0.926663	1.04519	1.00587	0.774398	0.847822	1.00359	0.937792
ACOT9	acyl-CoA thioesterase 9		1.33476	1.34446	1.29221	1.65462	1.2437	0.952087	0.957566	1.70159
SDHD	succinate dehydrogenase complex, subunit D, integral membrane protein		1.12011	1.01628	1.18026	1.05817	1.01499	0.970889	1.20634	1.29541
DLAT	dihydrolipoamide S-acetyltransferase (E2 component of pyruvate dehydrogenase complex)		1.01042	0.973703	1.13334	1.07201	0.957913	0.883228	1.13646	1.05336
CCBL2	cysteine conjugate-beta lyase 2		0.859053	1.01731	0.997746	1.04789	0.875581	0.985858	1.00105	1.23659
SUCLG1	succinate-CoA ligase, GDP-forming, alpha subunit		0.874711	1.06875	1.08464	1.00933	0.8124	0.800251	0.949305	1.02219
MOCS3	molybdenum cofactor synthesis 3		1.05371	1.05596	1.28446	1.04069	0.968275	1.21655	1.24778	1.33422
TDO2	tryptophan 2,3-dioxygenase		0.814482	1.00277	1.16689	1.05462	0.933122	1.00467	1.0133	1.0459
IDH3B	isocitrate dehydrogenase 3 (NAD+) beta		1.03664	1.05844	1.14511	1.10173	0.951696	0.933305	1.1041	1.18234
MCCC2	methylcrotonoyl-Coenzyme A carboxylase 2 (beta)		0.885952	1.12478	1.16155	0.994217	0.822693	0.857557	1.00578	1.04163
NDUFV2	NADH dehydrogenase (ubiquinone) flavoprotein 2		0.947476	1.03249	1.17733	1.01883	0.902102	1.02337	1.15667	1.09447
NDUFS4	NADH dehydrogenase (ubiquinone) Fe-S protein 4		0.915561	0.972975	1.12024	1.11421	1.01223	0.989483	1.11531	1.07447
GCH1	GTP cyclohydrolase 1		0.819847	0.877585	1.24082	0.767128	0.99994	0.974773	1.011	1.15511
PDHX	pyruvate dehydrogenase complex, component X		1.04793	1.04458	1.16605	1.07583	0.93201	0.953908	0.98086	1.2975
SDHA	succinate dehydrogenase complex, subunit A, flavoprotein (Fp)		1.01975	1.04162	1.18004	1.08206	0.909677	0.95729	1.07968	1.11743
GRB10	growth factor receptor bound protein 10		0.956981	1.22235	1.19302	1.19865	1.16327	1.02398	1.18595	1.35725
NFU1	NFU1 iron-sulfur cluster scaffold homolog (S. cerevisiae)		0.880866	0.94044	1.04128	1.03329	0.925095	0.825951	0.932634	1.02422
QPRT	quinolinate phosphoribosyltransferase		1.06176	1.00214	1.07818	1.22346	1.01456	0.976716	1.05238	1.19901
PANK3	pantothenate kinase 3		0.818306	1.03383	1.06949	0.966831	0.835547	0.87505	0.983713	0.977533
DLST	dihydrolipoamide S-succinyltransferase (E2 component of 2-oxo-glutarate complex)		1.01041	1.06913	1.11454	1.07922	0.819437	0.851607	1.00838	1.0002
LDHB	lactate dehydrogenase B		1.41887	0.734721	1.05321	1.16392	0.99995	1.09767	1.21494	1.32515
ABCB6	ATP-binding cassette, sub-family B (MDR/TAP), member 6		0.928124	1.00386	1.04386	1.14924	1.088	1.03376	1.09256	1.24995
LIAS	lipoic acid synthetase		0.970031	0.978842	1.17307	1.01168	0.864598	0.936286	0.919457	1.08871
ISCU	IscU iron-sulfur cluster scaffold homolog (E. coli)		0.976932	1.00354	1.07613	1.13024	0.965882	0.930097	0.964571	1.16324
BDH2	3-hydroxybutyrate dehydrogenase, type 2		1.35104	1.10467	1.20644	0.983377	1.00117	1.017	1.41511	1.39451
ISCA2	iron-sulfur cluster assembly 2 homolog (S. cerevisiae)		1.00499	0.997311	1.02572	1.07807	1.11336	0.978688	1.19641	1.26723
MMAB	methylmalonic aciduria (cobalamin deficiency) type B homolog (human)		1.04854	1.23068	1.0369	1.30434	0.966346	0.913124	1.07629	1.21977
TPI1	triosephosphate isomerase 1		1.08199	1.00264	1.11301	1.24775	1.18712	1.00911	1.1545	1.24828
NDUFC2	NADH dehydrogenase (ubiquinone) 1, subcomplex unknown, 2		1.02734	1.07005	1.18547	1.08277	0.95721	0.880605	1.03897	1.05957
NDUFB8	NADH dehydrogenase (ubiquinone) 1 beta subcomplex 8		1.05002	1.00879	1.26929	0.993809	1.09091	1.07914	1.23191	1.19387
CISD1	CDGSH iron sulfur domain 1		1.04366	0.99233	1.1927	0.915785	0.818608	0.766144	0.932596	0.973102
SLC16A1	solute carrier family 16 (monocarboxylic acid transporters), member 1		0.876949	1.02367	0.925815	1.12908	0.825551	0.759139	0.806551	0.990558
NDUFA7	NADH dehydrogenase (ubiquinone) 1 alpha subcomplex, 7 (B14.5a)		0.883698	0.957158	1.02317	0.930819	0.870596	0.841192	0.92847	1.03939
MAT1A	methionine adenosyltransferase I, alpha		0.974411	0.984422	1.13741	1.08052	0.991542	0.977875	1.06395	1.05129
DCAKD	dephospho-CoA kinase domain containing		0.838568	1.0173	0.886639	1.11733	0.892994	0.79683	0.919954	0.978134
IGF1	insulin-like growth factor 1		0.973023	0.956872	1.09519	0.972503	0.971369	0.998525	1.15913	1.06459
PPP1CA	protein phosphatase 1, catalytic subunit, alpha isoform		0.994527	0.982213	1.04298	1.15874	0.954511	0.970564	1.07056	1.01163
BAX	BCL2-associated X protein		1.06443	0.945051	1.03829	1.13574	0.987399	0.924581	0.900538	1.22954
GCDH	glutaryl-Coenzyme A dehydrogenase		1.00086	1.03569	1.09103	1.08174	0.876732	0.958982	1.02838	1.0459
PDK2	pyruvate dehydrogenase kinase, isoenzyme 2		0.990782	0.992989	1.12981	1.07606	1.03252	0.975243	1.07408	1.09653
UBIAD1	UbiA prenyltransferase domain containing 1		0.928693	1.02032	0.905717	1.13527	0.85659	0.93987	0.93385	1.13082
PDXK	pyridoxal (pyridoxine, vitamin B6) kinase		1.00131	1.04834	1.1212	1.08023	1.08982	1.04516	1.1947	1.18889
SLC25A39	solute carrier family 25, member 39		1.05998	1.04505	1.05811	1.19347	1.02847	0.934649	1.09749	1.10124
PDP2	pyruvate dehyrogenase phosphatase catalytic subunit 2		0.815902	1.14512	1.08492	0.96914	0.757964	0.81688	0.793798	1.01408
PGLS	6-phosphogluconolactonase		1.01128	1.14772	1.13704	1.12262	0.986429	0.785322	1.02598	1.00575
OXA1L	oxidase assembly 1-like		1.13704	1.14966	1.1786	1.24279	1.15477	1.05171	1.23728	1.24063
NAMPT	nicotinamide phosphoribosyltransferase		1.03127	1.13434	1.0843	1.11749	1.00123	0.957036	1.13251	1.15779
CYP1A2	cytochrome P450, family 1, subfamily a, polypeptide 2		0.917749	1.17159	1.06655	1.04584	0.993181	1.27569	1.3334	1.28358
SLC25A13	solute carrier family 25 (mitochondrial carrier, adenine nucleotide translocator), member 13		0.995702	1.00099	1.1004	1.05709	1.0748	0.959303	1.10723	1.10445
COASY	Coenzyme A synthase		0.969989	1.00211	1.08759	0.988096	0.938249	0.818011	0.944844	1.01633
PGM2	phosphoglucomutase 2		0.95755	1.03654	1.07135	1.00363	0.901724	0.889938	1.03218	0.990755
NUDT7	nudix (nucleoside diphosphate linked moiety X)-type motif 7		1.08913	1.08515	0.9692	1.08482	0.95284	0.98127	1.17913	1.19947
TBRG4	transforming growth factor beta regulated gene 4		1.1638	1.09703	1.19691	1.07148	1.00853	0.937985	1.09527	1.17078
RSAD1	radical S-adenosyl methionine domain containing 1		0.896199	1.00991	0.912108	0.97683	0.759362	0.810236	0.850578	0.992631
MVK	mevalonate kinase		1.05411	1.3358	1.09243	1.36926	1.04472	1.21554	1.27703	1.2526
PTH	parathyroid hormone		1.13027	1.03809	1.05568	1.0425	0.990604	0.948886	1.12323	1.17775
IDH3G	isocitrate dehydrogenase 3 (NAD+), gamma		1.04676	1.06096	1.08995	1.11368	1.01226	0.972665	1.06556	1.10769
MTOR	mechanistic target of rapamycin (serine/threonine kinase)		1.04921	1.08588	1.12785	1.06805	0.982644	0.950763	1.01707	1.13425
ACLY	ATP citrate lyase		0.933643	0.805274	0.585866	1.04909	0.984051	0.950004	1.17544	1.10804
MTHFD1	methylenetetrahydrofolate dehydrogenase (NADP+ dependent), methenyltetrahydrofolate cyclohydrolase, formyltetrahydrofolate synthase		1.01479	1.02247	1.06583	0.95738	0.843576	0.844882	0.970254	0.966057
TAZ	tafazzin		1.1103	1.13445	1.07985	1.06728	1.00115	0.984568	1.195	1.15288
COQ5	coenzyme Q5 homolog, methyltransferase (yeast)		1.13954	1.05936	1.13151	1.11414	0.999447	0.981295	1.05787	1.13692
ANK1	ankyrin 1, erythroid		0.862378	0.91911	0.964394	0.99455	0.932416	1.00067	1.10987	0.867105
CIAO1	cytosolic iron-sulfur protein assembly 1 homolog (S. cerevisiae)		1.07693	1.10129	1.14247	1.06328	0.995416	0.865663	0.981175	1.08768
COQ6	coenzyme Q6 homolog (yeast)		0.928705	1.00203	0.927213	0.998585	0.827451	0.732264	0.78486	0.972748
SDHC	succinate dehydrogenase complex, subunit C, integral membrane protein		1.16972	1.12908	1.18954	1.13613	0.973547	0.927113	1.03199	1.05942
FASTKD2	FAST kinase domains 2		1.18118	1.04575	1.0912	0.963832	1.14291	0.852256	0.987116	1.36304
PDSS2	prenyl (solanesyl) diphosphate synthase, subunit 2		1.04144	1.04595	1.04712	1.07336	1.0895	0.955692	0.998254	1.18702
PDP1	pyruvate dehyrogenase phosphatase catalytic subunit 1		1.04654	0.853715	0.906507	1.11678	0.890101	1.02766	0.89974	1.04541
FECH	ferrochelatase		0.936543	0.985039	1.0138	0.996982	1.06197	1.13885	1.13818	1.1321
NARFL	nuclear prelamin A recognition factor-like		1.05292	1.06822	1.09912	1.05435	1.04526	1.04906	1.09117	1.13283
LIPT2	lipoyl(octanoyl) transferase 2 (putative)		0.968454	0.949476	1.01431	0.924387	0.880073	0.853854	0.984813	0.856814
DHFR	dihydrofolate reductase		0.847059	0.886416	0.947825	0.783949	0.953399	1.07153	1.08545	1.07284
TMEM14C	transmembrane protein 14C		0.988369	0.929107	1.05019	0.865694	0.830079	0.759723	0.824797	0.887654
NADSYN1	NAD synthetase 1		1.15329	1.08774	1.06133	1.0399	1.1469	0.96058	1.06081	1.33074
MOCS1	molybdenum cofactor synthesis 1		1.02033	1.08439	1.31515	1.24224	1.32866	1.22712	1.13273	1.1179
NUBP1	nucleotide binding protein 1		1.05862	1.07538	0.982958	1.15529	1.00892	0.993202	1.04514	1.07931
IREB2	iron responsive element binding protein 2		0.997669	1.1158	1.0257	1.05776	0.942206	0.913827	0.951513	1.05211
MTHFD2	methylenetetrahydrofolate dehydrogenase (NAD+ dependent), methenyltetrahydrofolate cyclohydrolase		1.08012	1.0181	1.18363	1.62281	1.45235	1.01434	0.863621	1.02476
PDHA1	pyruvate dehydrogenase E1 alpha 1		1.09777	1.0073	1.10691	0.946276	0.934493	0.876997	0.95469	1.01272
MOCS2	molybdenum cofactor synthesis 2		0.922336	1.0681	1.11371	0.92278	0.940572	0.870791	0.916184	0.948933
HAAO	3-hydroxyanthranilate 3,4-dioxygenase		1.0185	1.00405	1.07913	0.959545	1.04404	1.06268	1.10355	1.07528
PCBD1	pterin 4 alpha carbinolamine dehydratase/dimerization cofactor of hepatocyte nuclear factor 1 alpha (TCF1) 1		0.919087	1.01313	1.01083	0.989745	0.999957	1.0391	1.06082	0.98894
SPR	sepiapterin reductase		1.05564	0.977338	1.02167	1.06149	1.00468	0.943627	0.954773	0.989029
FLAD1	RFad1, flavin adenine dinucleotide synthetase, homolog (yeast)		0.974198	1.135	0.987577	1.02495	1.13903	0.961194	1.03303	1.20851
PPOX	protoporphyrinogen oxidase		0.985491	1.06115	0.98599	0.99682	1.04123	0.88956	1.03745	0.998112
COX15	COX15 homolog, cytochrome c oxidase assembly protein (yeast)		1.0866	1.09144	1.06432	1.09262	0.991284	0.880811	0.906877	1.00634
PCBD2	pterin 4 alpha carbinolamine dehydratase/dimerization cofactor of hepatocyte nuclear factor 1 alpha (TCF1) 2		1.29895	1.20359	1.3256	1.16269	1.06233	1.08052	0.998548	1.14446
ACSS1	acyl-CoA synthetase short-chain family member 1		1.195	1.03494	1.02826	1.33608	1.24073	1.21874	1.23305	1.0464

## Sheet: Oxidative_phosphorylation
Gene name	description		LF-NP_1W	HF-NP_1W	LF-HP_1W	HF-HP_1W	LF-NP_12W	HF-NP_12W	LF-HP_12W	HF-HP_12W
PPARGC1A	peroxisome proliferative activated receptor, gamma, coactivator 1 alpha		0.654147	0.68595	1.67186	1.96996	0.753056	0.523824	1.21364	2.4717
COX7A1	cytochrome c oxidase, subunit VIIa 1		0.90612	0.879487	1.64357	2.01805	1.04291	0.747832	1.28741	2.6822
GOT1	glutamate oxaloacetate transaminase 1, soluble		0.931644	0.863746	1.66962	1.62075	0.731043	0.489123	1.17789	1.51756
GNPDA1	glucosamine-6-phosphate deaminase 1		0.913481	0.860631	1.74434	2.11509	1.17156	1.30144	1.9851	2.46965
ACSL4	acyl-CoA synthetase long-chain family member 4		0.876945	1.06702	1.47947	2.13465	0.833596	0.727086	1.45768	1.68021
ASS1	argininosuccinate synthetase 1		1.10544	0.540996	1.29343	1.63455	0.827751	1.00229	1.32539	2.13074
LPL	lipoprotein lipase		0.819061	1.53998	1.769	2.53369	1.03437	1.05706	1.38905	2.24926
SLC25A22	solute carrier family 25 (mitochondrial carrier, glutamate), member 22		0.830008	1.00159	1.28443	1.46109	0.774903	0.754862	1.26165	1.67131
ATP4A	ATPase, H+/K+ exchanging, gastric, alpha polypeptide		0.983761	0.856891	1.03722	1.86899	1.0067	0.925669	1.56833	1.83856
LHPP	phospholysine phosphohistidine inorganic pyrophosphate phosphatase		1.04091	0.835452	1.84604	1.39387	0.984368	0.751359	1.24789	1.31571
MCART1	mitochondrial carrier triple repeat 1		0.721877	0.820342	1.15855	1.2358	0.619515	0.679288	0.778634	1.3247
IDH2	isocitrate dehydrogenase 2 (NADP+), mitochondrial		0.977776	1.05693	1.52604	1.55191	0.939687	0.872068	1.35989	1.63667
SLC3A1	solute carrier family 3, member 1		1.03041	1.14388	1.69572	2.21861	1.27553	1.20642	1.2753	2.11755
FH1	fumarate hydratase 1		1.02735	1.04173	1.54222	1.46433	0.904426	0.894354	1.2712	1.71798
AASS	aminoadipate-semialdehyde synthase		0.916062	1.04186	1.50713	1.31551	0.791759	0.823318	1.14782	1.36462
IDH3A	isocitrate dehydrogenase 3 (NAD+) alpha		0.969869	1.02356	1.39146	1.37694	0.822884	0.825503	1.13632	1.4596
DDIT4	DNA-damage-inducible transcript 4		0.740626	1.26152	1.43879	1.55038	0.779311	0.632782	0.62772	1.40845
PFKP	phosphofructokinase, platelet		1.24784	1.20523	1.12962	2.11812	1.39543	1.03394	1.29534	2.54967
COQ10B	coenzyme Q10 homolog B (S. cerevisiae)		0.89036	0.929466	1.21371	1.3156	0.839085	0.931379	1.16263	1.46724
APH1A	anterior pharynx defective 1a homolog (C. elegans)		0.730853	1.04999	1.91237	0.845668	0.730566	1.02088	1.1986	1.11455
SLC25A15	solute carrier family 25 (mitochondrial carrier ornithine transporter), member 15		0.909672	0.995857	1.31123	1.30234	0.837369	0.792271	1.05893	1.38375
GM6969	predicted pseudogene 6969		0.734661	0.596687	0.950559	1.21106	0.67443	0.833619	0.968339	0.802642
PCK1	phosphoenolpyruvate carboxykinase 1, cytosolic		0.656924	0.770733	0.999257	0.975789	0.735192	0.617606	0.749439	1.05594
GCAT	glycine C-acetyltransferase (2-amino-3-ketobutyrate-coenzyme A ligase)		1.03338	1.08157	1.32847	1.24031	0.960161	0.928011	1.43343	1.41434
GNMT	glycine N-methyltransferase		1.00836	1.00056	1.40836	1.14869	0.938686	0.887381	1.25809	1.31273
NQO1	NAD(P)H dehydrogenase, quinone 1		1.50558	1.13767	1.73521	1.87953	0.915931	0.98427	0.989609	1.39859
BCKDHB	branched chain ketoacid dehydrogenase E1, beta polypeptide		1.00595	1.1173	1.3961	1.2842	0.904539	0.966176	1.35824	1.22195
GSTK1	glutathione S-transferase kappa 1		0.887757	1.07452	1.39982	1.36953	0.972763	1.06996	1.22346	1.23831
SLC25A48	solute carrier family 25, member 48		1.04912	0.910339	1.35128	1.13198	1.06068	0.711932	1.134	1.24609
IVD	isovaleryl coenzyme A dehydrogenase		1.00504	1.08816	1.25997	1.28379	0.868951	0.851084	1.14644	1.26565
SLC25A25	solute carrier family 25 (mitochondrial carrier, phosphate carrier), member 25		0.852219	1.04404	0.93988	1.12029	0.750368	0.680648	1.04334	1.20175
NDUFA5	NADH dehydrogenase (ubiquinone) 1 alpha subcomplex, 5		1.13716	1.09419	1.47836	1.13707	0.919065	0.829893	1.23813	1.29018
NRM	nurim (nuclear envelope membrane protein)		0.964401	1.07542	1.18529	1.58489	1.32802	1.17997	1.43203	1.59181
SLC25A40	solute carrier family 25, member 40		0.745464	1.07289	0.854366	1.22591	1.0095	0.795607	1.06078	1.47204
APP	amyloid beta (A4) precursor protein		1.13614	1.0249	1.05447	2.01742	1.20125	1.11717	1.12713	1.50003
COX11	COX11 homolog, cytochrome c oxidase assembly protein (yeast)		0.880773	0.943542	1.11525	1.15505	0.921389	1.04998	1.2951	1.24552
CYCS	cytochrome c, somatic		0.673704	0.973778	0.95309	0.816738	0.613072	0.469719	0.715806	0.968942
GUF1	GUF1 GTPase homolog (S. cerevisiae)		0.951927	1.07329	1.30615	1.04404	0.888271	0.888128	1.2091	1.22872
ATP5O	ATP synthase, H+ transporting, mitochondrial F1 complex, O subunit		1.00717	0.980862	1.27644	1.1889	0.936829	0.916973	1.16279	1.20425
UQCRH	ubiquinol-cytochrome c reductase hinge protein		1.11955	0.982565	1.27682	1.32871	1.06838	1.03948	1.2175	1.46544
FADS3	fatty acid desaturase 3		0.910034	1.14042	1.09078	1.72337	1.06472	1.1668	1.27512	1.27053
ALDH1L1	aldehyde dehydrogenase 1 family, member L1		0.970011	1.04163	1.26015	1.16876	0.964035	0.934036	1.25574	1.20317
APEX2	apurinic/apyrimidinic endonuclease 2		0.976018	0.905289	1.39635	1.20472	0.800632	0.817486	0.765249	0.99863
SLC25A34	solute carrier family 25, member 34		0.773781	0.87877	1.02701	0.964771	0.635306	0.723057	0.751273	0.992374
TOMM5	translocase of outer mitochondrial membrane 5 homolog (yeast)		0.947815	1.20142	1.31637	1.40402	1.42347	0.708781	0.960008	1.6269
PPIF	peptidylprolyl isomerase F (cyclophilin F)		1.15147	1.07677	1.28241	1.34088	1.12648	1.01425	1.35332	1.43488
SLC25A35	solute carrier family 25, member 35		1.12427	1.11766	1.42506	1.16845	1.27776	1.06563	1.47792	1.60805
SDHB	succinate dehydrogenase complex, subunit B, iron sulfur (Ip)		1.03158	1.08214	1.23129	1.16251	0.871162	0.875683	1.19874	1.17259
QDPR	quinoid dihydropteridine reductase		1.02377	1.00974	1.24303	1.11268	0.887807	0.902237	1.24483	1.11651
ACSL3	acyl-CoA synthetase long-chain family member 3		0.664092	1.09486	0.953395	1.15984	0.84151	0.883227	0.982622	1.19837
COX5A	cytochrome c oxidase, subunit Va		1.0397	1.03529	1.24377	1.10613	0.867884	0.865997	1.076	1.26186
SLC25A12	solute carrier family 25 (mitochondrial carrier, Aralar), member 12		1.2132	1.22183	1.52269	1.5979	1.34842	1.21168	1.51401	1.50606
ENO3	enolase 3, beta muscle		0.920357	0.915584	1.25421	0.911439	0.964088	0.881668	1.1243	1.23578
GYG	glycogenin		0.872199	0.972553	1.02439	1.36694	0.973987	0.996501	1.08483	1.21295
SUCLA2	succinate-Coenzyme A ligase, ADP-forming, beta subunit		0.940174	0.983362	1.15704	1.10547	0.911714	0.94693	1.18277	1.19548
NDUFB5	NADH dehydrogenase (ubiquinone) 1 beta subcomplex, 5		1.01748	1.06662	1.24558	1.07017	0.913662	0.869184	1.23048	1.19448
OXCT2B	3-oxoacid CoA transferase 2B		0.591054	0.613037	0.746147	0.829976	0.691282	0.864064	0.857582	0.947394
ACSL5	acyl-CoA synthetase long-chain family member 5		0.811168	0.950276	1.05882	1.0117	0.750038	0.820959	1.03323	0.978238
TMX4	thioredoxin-related transmembrane protein 4		1.132	1.14349	1.14352	1.42502	0.802885	0.788753	0.887261	1.27558
FDXR	ferredoxin reductase		0.908814	0.998197	1.05934	1.06422	0.888605	0.728124	0.917367	1.26114
ATP6AP2	ATPase, H+ transporting, lysosomal accessory protein 2		0.884548	0.878041	0.980676	1.19983	0.946343	0.896743	1.02229	1.19032
COX4I1	cytochrome c oxidase subunit IV isoform 1		0.990292	1.10511	1.22476	1.23967	0.955397	0.834161	1.09628	1.16938
GHITM	growth hormone inducible transmembrane protein		0.935486	0.967566	1.12259	1.25583	0.857749	0.956391	0.968694	1.17609
PHKA1	phosphorylase kinase alpha 1		1.1727	1.13263	1.296	1.27036	1.02217	0.863635	1.21129	1.32162
PPP3CC	protein phosphatase 3, catalytic subunit, gamma isoform		0.980521	1.09549	1.09647	1.09117	0.918698	0.799988	1.26757	1.15292
C330018D20RIK	RIKEN cDNA C330018D20 gene		0.857859	0.876068	1.09354	1.00941	0.869999	0.844961	0.886165	1.19761
AIFM3	apoptosis-inducing factor, mitochondrion-associated 3		1.03569	1.16262	1.37071	1.21348	1.04369	1.09574	1.34686	1.33328
TOMM22	translocase of outer mitochondrial membrane 22 homolog (yeast)		0.789285	0.947438	1.16915	0.885626	1.07156	1.22396	1.88296	0.948375
COX7B	cytochrome c oxidase subunit VIIb		0.827715	0.905697	1.07468	1.0077	0.985656	0.934499	1.2317	1.11153
GYS1	glycogen synthase 1, muscle		1.19189	1.37314	1.50351	1.57173	1.25516	1.15317	1.43748	1.51003
POLR2C	polymerase (RNA) II (DNA directed) polypeptide C		1.1647	0.799582	1.16043	1.44834	0.86252	1.05276	0.926552	1.15909
STEAP2	six transmembrane epithelial antigen of prostate 2		1.24387	0.95852	1.01821	1.68419	1.48819	1.25606	1.48429	1.79655
PMPCB	peptidase (mitochondrial processing) beta		0.906475	1.03975	1.16968	1.10528	0.7765	0.800872	0.968116	1.00773
MDH2	malate dehydrogenase 2, NAD (mitochondrial)		1.02203	1.06166	1.14384	1.40322	0.997474	0.935367	1.08957	1.20221
1810027O10RIK	RIKEN cDNA 1810027O10 gene		0.90155	0.931348	1.32949	1.07698	1.14418	0.999737	1.12384	1.25629
NDUFC1	NADH dehydrogenase (ubiquinone) 1, subcomplex unknown, 1		0.924463	1.07598	1.27249	1.13918	0.938814	0.869978	1.06478	1.10555
2310003L22RIK	RIKEN cDNA 2310003L22 gene		0.939124	1.08325	1.10868	1.29366	0.959112	0.952286	1.12327	1.20371
ENPP1	ectonucleotide pyrophosphatase/phosphodiesterase 1		1.08	0.970361	1.26012	1.2957	1.35948	1.20929	1.44188	1.54289
PYGB	brain glycogen phosphorylase		1.12225	1.22123	0.995272	2.06624	1.36371	1.07206	1.19212	1.4771
SLC25A18	solute carrier family 25 (mitochondrial carrier), member 18		0.8439	0.843141	1.19378	0.993249	1.02768	1.08164	1.37817	0.982378
AIFM2	apoptosis-inducing factor, mitochondrion-associated 2		0.768879	0.926559	1.1401	0.928234	0.698414	0.637682	0.718343	0.844659
HSD17B10	hydroxysteroid (17-beta) dehydrogenase 10		0.862614	1.04979	1.2863	1.05883	0.776335	0.853028	0.964717	0.932164
CBARA1	calcium binding atopy-related autoantigen 1		0.911489	1.01647	1.06452	1.23356	0.897007	0.826737	0.980292	1.09416
STAR	steroidogenic acute regulatory protein		1.02071	0.992168	1.27877	0.984693	0.798578	0.848772	0.888288	1.23068
GM4943	predicted pseudogene 4943		0.8535	1.10796	1.24912	1.03487	1.0471	1.04169	1.41629	1.1399
ASL	argininosuccinate lyase		0.962297	0.910352	1.12742	0.96373	0.862706	0.791392	0.969782	1.14802
NDUFS2	NADH dehydrogenase (ubiquinone) Fe-S protein 2		0.983438	0.993384	1.19715	1.0568	0.873567	0.807892	0.995389	1.10869
DLD	dihydrolipoamide dehydrogenase		0.919626	1.12037	1.22022	1.10873	0.897429	0.996659	1.21642	1.13949
CAPN10	calpain 10		1.04069	1.06129	1.29764	1.29331	1.04983	1.07855	1.23337	1.20623
MTX2	metaxin 2		1.1182	1.05591	1.21074	1.10087	0.868068	0.874154	1.20529	1.13289
1110002N22RIK	RIKEN cDNA 1110002N22 gene		1.21729	1.14468	1.45976	1.22548	1.05531	1.07016	1.29647	1.33979
NKX1-1	NK1 transcription factor related, locus 1 (Drosophila)		0.885058	0.843772	0.886431	1.18944	0.817114	1.04585	1.12622	1.05526
CPS1	carbamoyl-phosphate synthetase 1		0.949426	1.00673	1.14928	1.12906	0.974602	0.934879	1.15108	1.146
COX6B1	cytochrome c oxidase, subunit VIb polypeptide 1		0.998956	1.02847	1.15372	1.12169	0.844814	0.867684	1.05621	1.09117
OGDH	oxoglutarate dehydrogenase (lipoamide)		1.03639	1.05625	1.19847	1.21956	1.09994	0.957556	1.19417	1.28775
SLC25A28	solute carrier family 25, member 28		1.06321	1.01601	1.22857	1.1567	1.02122	0.978024	1.21219	1.21384
PRODH	proline dehydrogenase		1.10649	1.04028	1.30683	1.09684	1.10972	0.972802	1.28619	1.29631
UQCRC1	ubiquinol-cytochrome c reductase core protein 1		0.962398	1.06977	1.18901	1.13951	0.973591	0.92696	1.11322	1.18701
SARM1	sterile alpha and HEAT/Armadillo motif containing 1		0.932757	0.829592	1.03835	1.28417	1.12622	1.15867	1.24253	1.19711
GPAT2	glycerol-3-phosphate acyltransferase 2, mitochondrial		0.861932	0.953728	1.16066	1.0177	0.976628	0.983834	1.12066	1.144
ATP6V0E	ATPase, H+ transporting, lysosomal V0 subunit E		1.08724	1.02311	1.23346	1.25645	0.960309	1.00437	1.10384	1.19908
CYC1	cytochrome c-1		0.974083	1.10524	1.18831	1.17922	0.987464	0.952619	1.15121	1.20344
GFPT1	glutamine fructose-6-phosphate transaminase 1		0.935973	1.13935	1.10989	1.17174	0.798242	0.944928	1.01842	1.18135
SLC18A1	solute carrier family 18 (vesicular monoamine), member 1		1.11174	1.11595	1.27824	1.50123	1.01239	0.877232	0.867686	1.18138
IMMT	inner membrane protein, mitochondrial		0.947523	0.980265	1.13399	1.11624	0.927489	0.975768	1.03944	1.19451
FASTKD3	FAST kinase domains 3		1.11626	1.04619	1.3553	1.38647	1.31112	0.957554	1.07722	1.3613
OPA1	optic atrophy 1 homolog (human)		0.951181	1.06504	1.165	1.09188	0.984068	1.01274	1.15964	1.27262
ATP5G3	ATP synthase, H+ transporting, mitochondrial F0 complex, subunit C3 (subunit 9)		1.06633	1.0963	1.23936	1.20089	0.903956	0.875923	1.05301	1.11081
NDUFA12	NADH dehydrogenase (ubiquinone) 1 alpha subcomplex, 12		0.981496	1.0415	1.28395	1.00694	0.942257	1.01274	1.24621	1.10701
ERO1L	ERO1-like (S. cerevisiae)		0.998359	1.03165	1.30962	1.26152	1.12361	1.24218	1.12228	1.43578
COX6A1	cytochrome c oxidase, subunit VI a, polypeptide 1		0.888583	0.990293	1.05979	1.02686	0.814345	0.825568	1.07591	0.942399
COX10	COX10 homolog, cytochrome c oxidase assembly protein, heme A: farnesyltransferase (yeast)		1.0335	1.01455	1.04707	1.18864	0.986438	0.858343	1.16372	1.14175
ATP5C1	ATP synthase, H+ transporting, mitochondrial F1 complex, gamma polypeptide 1		1.04304	1.06964	1.13468	1.08838	0.892242	0.901864	1.17311	1.15696
UQCR10	ubiquinol-cytochrome c reductase, complex III subunit X		0.943464	0.966618	1.16603	0.99976	0.969902	0.845081	1.07395	1.09395
ATP6V0A2	ATPase, H+ transporting, lysosomal V0 subunit A2		0.951107	1.05991	1.11493	1.22712	0.960012	0.961272	1.02277	1.20924
ATP6V1E1	ATPase, H+ transporting, lysosomal V1 subunit E1		1.03237	0.950375	1.17944	1.03118	0.865994	0.842506	1.0057	1.07572
MRPS21	mitochondrial ribosomal protein S21		1.00878	0.918613	1.14423	0.995156	0.799147	0.901208	0.885882	1.19063
ALDOA	aldolase A, fructose-bisphosphate		1.25222	1.18588	1.2831	1.70293	1.34965	1.10017	1.2506	1.44347
ATP6V0A1	ATPase, H+ transporting, lysosomal V0 subunit A1		0.978474	1.09553	1.15064	1.25	1.05388	1.07909	1.12146	1.36633
LETM1	leucine zipper-EF-hand containing transmembrane protein 1		0.893494	0.92529	1.06931	1.09969	0.870069	0.8229	0.899914	1.00728
MDH1	malate dehydrogenase 1, NAD (soluble)		0.979455	1.03736	1.18136	1.0962	0.884284	0.973048	1.09406	1.12288
ACO2	aconitase 2, mitochondrial		0.926296	1.00972	1.12914	1.06681	0.86234	0.802528	0.978439	1.00236
FASTKD1	FAST kinase domains 1		1.05456	1.0609	1.13956	1.01858	0.849591	0.866522	1.09294	1.18727
NDUFB6	NADH dehydrogenase (ubiquinone) 1 beta subcomplex, 6		1.04869	1.14435	1.16479	1.10628	0.912038	0.879674	1.15334	1.19054
MCCC1	methylcrotonoyl-Coenzyme A carboxylase 1 (alpha)		0.974617	1.09149	1.19861	1.10971	0.799817	0.843109	0.907166	1.07585
ALDH4A1	aldehyde dehydrogenase 4 family, member A1		0.979602	1.13242	1.23629	1.1553	0.950271	0.88563	1.0576	1.11853
COX7A2	cytochrome c oxidase, subunit VIIa 2		1.05661	1.04592	1.12073	1.21142	0.96135	1.13234	1.28532	1.23506
UQCRFS1	ubiquinol-cytochrome c reductase, Rieske iron-sulfur polypeptide 1		1.12313	1.03346	1.19231	1.03088	0.867872	0.827517	1.05585	1.17317
NDUFS1	NADH dehydrogenase (ubiquinone) Fe-S protein 1		1.12952	1.08695	1.20759	1.00237	0.76915	0.797028	1.14738	1.01316
UBE1Y1	ubiquitin-activating enzyme E1, Chr Y 1		0.853	1.05132	0.848693	0.771867	0.876317	0.785822	1.20426	1.28408
ATP6V1H	ATPase, H+ transporting, lysosomal V1 subunit H		0.960628	1.00596	1.08865	1.09452	0.841448	0.905609	0.950041	1.14363
ETFA	electron transferring flavoprotein, alpha polypeptide		0.93289	1.03959	1.0924	0.978489	0.796275	0.827467	1.01891	1.05001
SDHD	succinate dehydrogenase complex, subunit D, integral membrane protein		1.12011	1.01628	1.18026	1.05817	1.01499	0.970889	1.20634	1.29541
DLAT	dihydrolipoamide S-acetyltransferase (E2 component of pyruvate dehydrogenase complex)		1.01042	0.973703	1.13334	1.07201	0.957913	0.883228	1.13646	1.05336
PYCR2	pyrroline-5-carboxylate reductase family, member 2		1.21583	1.14403	1.26048	1.35587	1.07498	1.1128	1.2895	1.31893
NDUFV1	NADH dehydrogenase (ubiquinone) flavoprotein 1		0.995954	1.01875	1.15199	1.10976	0.937444	0.922332	1.0312	1.15737
GAPDHS	glyceraldehyde-3-phosphate dehydrogenase, spermatogenic		0.997835	0.892424	0.975724	0.984646	1.05713	0.877333	1.23083	1.19903
NDUFA4	NADH dehydrogenase (ubiquinone) 1 alpha subcomplex, 4		1.05634	0.995413	1.23847	1.07924	0.873982	0.840406	0.939231	1.0659
NDUFS5	NADH dehydrogenase (ubiquinone) Fe-S protein 5		0.773285	0.910322	1.09036	0.804858	0.745707	0.940084	1.00713	0.964444
NDUFA10	NADH dehydrogenase (ubiquinone) 1 alpha subcomplex 10		1.0257	1.03914	1.12534	1.18818	0.92387	0.862196	1.07039	1.03528
ATP5E	ATP synthase, H+ transporting, mitochondrial F1 complex, epsilon subunit		1.08092	1.05088	1.17497	0.997704	0.883247	0.786199	1.03071	1.1583
TAF4B	TAF4B RNA polymerase II, TATA box binding protein (TBP)-associated factor		1.16168	1.10002	1.05261	1.43976	0.906639	0.983247	0.912872	1.35575
CDS2	CDP-diacylglycerol synthase (phosphatidate cytidylyltransferase) 2		1.14257	0.973347	1.26249	1.243	1.14633	1.05085	1.18205	1.25769
POR	P450 (cytochrome) oxidoreductase		1.03199	1.05228	1.29159	1.07776	0.846963	0.812149	0.954692	0.966228
MAOA	monoamine oxidase A		0.984223	0.867708	1.04514	1.09965	0.990797	0.739232	1.00671	0.95294
SLC25A3	solute carrier family 25 (mitochondrial carrier, phosphate carrier), member 3		0.930376	0.997043	1.05045	1.15816	1.0203	0.982425	1.17881	1.11093
NDUFV3	NADH dehydrogenase (ubiquinone) flavoprotein 3		0.957122	1.01913	1.24513	1.09431	0.997578	1.18892	1.16093	1.26253
TIMM17A	translocase of inner mitochondrial membrane 17a		1.25677	1.09757	1.23104	1.22589	1.03101	0.915788	1.18578	1.27835
MAOB	monoamine oxidase B		0.923856	1.00372	1.22605	1.08389	0.940113	1.02049	1.0888	1.04975
APH1C	anterior pharynx defective 1c homolog (C. elegans)		0.89584	0.883127	1.0344	1.13293	0.878539	0.825525	0.932253	0.88371
SLC25A4	solute carrier family 25 (mitochondrial carrier, adenine nucleotide translocator), member 4		1.30465	1.18996	1.37441	1.95802	1.3533	1.07973	1.13546	1.1668
SUCLG1	succinate-CoA ligase, GDP-forming, alpha subunit		0.874711	1.06875	1.08464	1.00933	0.8124	0.800251	0.949305	1.02219
SFXN1	sideroflexin 1		1.0168	0.976615	1.12754	1.12173	0.927124	0.889479	1.02919	1.07643
OTC	ornithine transcarbamylase		0.834276	0.991728	1.15833	1.00857	0.963465	1.21572	1.25865	1.15037
SLC25A46	solute carrier family 25, member 46		0.905764	0.95363	1.18137	0.971769	0.828241	0.893898	0.968025	0.968928
HCCS	holocytochrome c synthetase		1.11564	1.1382	1.2121	1.1916	1.06211	1.02003	1.21589	1.33015
SLC25A27	solute carrier family 25, member 27		0.828105	0.899152	1.03263	0.894287	0.843451	0.657779	0.63161	1.12361
IDH3B	isocitrate dehydrogenase 3 (NAD+) beta		1.03664	1.05844	1.14511	1.10173	0.951696	0.933305	1.1041	1.18234
NDUFV2	NADH dehydrogenase (ubiquinone) flavoprotein 2		0.947476	1.03249	1.17733	1.01883	0.902102	1.02337	1.15667	1.09447
ATP5A1	ATP synthase, H+ transporting, mitochondrial F1 complex, alpha subunit 1		1.04273	1.04756	1.12985	1.12694	0.906706	0.873338	1.04063	1.10648
NDUFS4	NADH dehydrogenase (ubiquinone) Fe-S protein 4		0.915561	0.972975	1.12024	1.11421	1.01223	0.989483	1.11531	1.07447
UBE2G2	ubiquitin-conjugating enzyme E2G 2		1.02253	1.06077	1.3307	1.06876	0.812718	0.854884	0.82721	1.03553
SDHA	succinate dehydrogenase complex, subunit A, flavoprotein (Fp)		1.01975	1.04162	1.18004	1.08206	0.909677	0.95729	1.07968	1.11743
MTCH2	mitochondrial carrier homolog 2 (C. elegans)		1.01816	1.05106	1.22671	1.12841	0.920853	0.918684	1.06917	1.00989
SLC25A11	solute carrier family 25 (mitochondrial carrier oxoglutarate carrier), member 11		1.11956	1.02963	1.17884	1.16961	1.08324	0.997122	1.24077	1.20304
SMOX	spermine oxidase		0.845551	1.01694	0.884214	1.1474	0.880614	0.89251	0.959885	1.1241
GLRX2	glutaredoxin 2 (thioltransferase)		0.898337	0.953092	1.04155	1.10569	0.944374	0.963134	1.05803	1.04886
POLG	polymerase (DNA directed), gamma		1.00031	0.96791	1.16275	1.08273	0.89676	0.878041	0.9226	1.06684
SARDH	sarcosine dehydrogenase		1.03297	1.0815	1.21053	1.09113	0.975823	0.990446	1.10584	1.20664
ATP5K	ATP synthase, H+ transporting, mitochondrial F1F0 complex, subunit e		0.978802	1.24413	1.28863	0.960797	0.738416	0.643494	0.897601	0.928282
GRB10	growth factor receptor bound protein 10		0.956981	1.22235	1.19302	1.19865	1.16327	1.02398	1.18595	1.35725
GSR	glutathione reductase		1.08179	1.07093	1.18225	1.2154	0.998223	1.08173	1.12026	1.26445
SLC27A1	solute carrier family 27 (fatty acid transporter), member 1		0.674338	1.33807	1.1402	1.06698	0.612486	0.623753	0.698797	0.761535
POLR2G	polymerase (RNA) II (DNA directed) polypeptide G		1.16615	1.08811	1.07403	1.29233	1.28817	0.780208	1.12097	1.39214
WASF1	WASP family 1		1.10318	1.11762	1.182	1.08794	1.02852	0.979765	1.14346	1.35976
TXNRD2	thioredoxin reductase 2		0.908377	0.816137	0.973893	0.98991	1.00262	0.896224	1.02053	1.10326
SMCP	sperm mitochondria-associated cysteine-rich protein		0.816614	0.956079	0.888327	1.15198	0.770508	0.738797	0.829641	0.82696
PFKM	phosphofructokinase, muscle		1.01891	0.970562	1.06192	1.14614	1.21552	0.869862	1.05562	1.32611
CYP2J6	cytochrome P450, family 2, subfamily j, polypeptide 6		0.853433	1.01466	1.07116	0.930911	0.740241	1.00433	1.03302	1.0288
NDUFA9	NADH dehydrogenase (ubiquinone) 1 alpha subcomplex, 9		0.937264	1.04335	1.14305	1.16053	1.0275	1.05344	1.14342	1.12019
FADS1	fatty acid desaturase 1		0.9671	0.899807	1.01944	1.21064	1.04339	0.928871	0.980581	1.10541
CHCHD3	coiled-coil-helix-coiled-coil-helix domain containing 3		0.857867	0.936846	1.02278	0.874324	0.854526	0.866355	0.967849	1.08223
NDUFB11	NADH dehydrogenase (ubiquinone) 1 beta subcomplex, 11		0.935133	0.929066	1.1437	1.04253	1.12233	1.08881	1.04272	1.34222
DLST	dihydrolipoamide S-succinyltransferase (E2 component of 2-oxo-glutarate complex)		1.01041	1.06913	1.11454	1.07922	0.819437	0.851607	1.00838	1.0002
HERC2	hect (homologous to the E6-AP (UBE3A) carboxyl terminus) domain and RCC1 (CHC1)-like domain (RLD) 2		0.983535	1.00796	1.10972	1.08404	0.871589	0.846767	0.906412	1.05648
GLUD1	glutamate dehydrogenase 1		0.974984	0.999252	1.12522	1.13614	1.11678	1.04372	1.16301	1.20745
LDHB	lactate dehydrogenase B		1.41887	0.734721	1.05321	1.16392	0.99995	1.09767	1.21494	1.32515
STOML2	stomatin (Epb7.2)-like 2		0.902322	1.07027	1.14897	1.09135	1.0198	1.07617	1.13113	1.18115
ABCB6	ATP-binding cassette, sub-family B (MDR/TAP), member 6		0.928124	1.00386	1.04386	1.14924	1.088	1.03376	1.09256	1.24995
TBPL1	TATA box binding protein-like 1		0.946157	1.0735	1.08897	1.1903	0.855548	0.774755	0.711343	1.09154
CYB5R1	cytochrome b5 reductase 1		1.00594	0.908087	0.962669	1.1697	1.14348	0.857942	1.05101	1.19268
MYO19	myosin XIX		0.980179	0.976808	1.12666	1.03163	1.11093	0.936518	1.13097	1.18401
ATP5F1	ATP synthase, H+ transporting, mitochondrial F0 complex, subunit B1		1.02886	1.14089	1.11456	1.16964	0.865612	1.03641	1.16282	1.09975
NDUFA1	NADH dehydrogenase (ubiquinone) 1 alpha subcomplex, 1		1.08719	1.11873	1.27672	1.12761	1.03819	0.79961	0.952337	1.15832
AFG3L2	AFG3(ATPase family gene 3)-like 2 (yeast)		1.03516	0.998544	1.11391	1.02903	0.890984	0.854467	0.95973	1.1153
SLC6A3	solute carrier family 6 (neurotransmitter transporter, dopamine), member 3		0.937736	1.11885	1.23884	1.12939	1.24776	1.12442	1.22897	1.33796
MSTO1	misato homolog 1 (Drosophila)		0.992002	1.03729	0.966882	1.00304	0.813092	0.849169	0.993116	1.15041
BAK1	BCL2-antagonist/killer 1		1.21111	1.1698	1.24155	1.21427	1.05944	0.990614	1.29133	1.18884
NDUFB9	NADH dehydrogenase (ubiquinone) 1 beta subcomplex, 9		0.985712	1.05271	1.17925	1.12782	1.08152	1.08894	1.2149	1.16566
CACNA1D	calcium channel, voltage-dependent, L type, alpha 1D subunit		1.11887	0.916682	1.15759	1.11251	1.0217	0.942539	1.13429	1.04855
AIFM1	apoptosis-inducing factor, mitochondrion-associated 1		1.06353	1.10056	1.18862	1.16665	0.897237	0.983002	1.08708	1.05967
TPI1	triosephosphate isomerase 1		1.08199	1.00264	1.11301	1.24775	1.18712	1.00911	1.1545	1.24828
ATP5B	ATP synthase, H+ transporting mitochondrial F1 complex, beta subunit		0.972556	1.03567	1.12044	1.12924	1.05437	1.06636	1.18554	1.156
ATAD3A	ATPase family, AAA domain containing 3A		1.17906	1.171	1.16948	1.20188	0.960507	0.762654	1.0241	1.13342
COX8A	cytochrome c oxidase, subunit VIIIa		1.00032	0.988357	1.17879	1.07399	0.95184	0.927846	0.978009	1.06374
NDUFAF4	NADH dehydrogenase (ubiquinone) 1 alpha subcomplex, assembly factor 4		0.979904	1.02878	0.955999	0.903475	0.864388	0.785368	0.957772	1.24378
NDUFC2	NADH dehydrogenase (ubiquinone) 1, subcomplex unknown, 2		1.02734	1.07005	1.18547	1.08277	0.95721	0.880605	1.03897	1.05957
NDUFB8	NADH dehydrogenase (ubiquinone) 1 beta subcomplex 8		1.05002	1.00879	1.26929	0.993809	1.09091	1.07914	1.23191	1.19387
CISD1	CDGSH iron sulfur domain 1		1.04366	0.99233	1.1927	0.915785	0.818608	0.766144	0.932596	0.973102
CBR4	carbonyl reductase 4		0.957365	0.921637	1.00771	0.930606	0.794073	0.835821	0.965177	0.98613
ATP6V1G3	ATPase, H+ transporting, lysosomal V1 subunit G3		1.0023	0.893871	0.957781	1.05151	0.799471	1.12494	1.16237	1.0554
AP2S1	adaptor-related protein complex 2, sigma 1 subunit		0.974274	1.01627	1.15953	1.01547	0.929602	0.903038	1.05106	1.00344
ATP2A1	ATPase, Ca++ transporting, cardiac muscle, fast twitch 1		1.1309	1.16305	1.07015	1.16159	1.0187	1.24187	1.33156	1.47504
ATP6V0B	ATPase, H+ transporting, lysosomal V0 subunit B		0.985281	0.97578	1.00765	1.13465	0.958832	0.928344	0.989526	1.12294
TCIRG1	T-cell, immune regulator 1, ATPase, H+ transporting, lysosomal V0 protein A3		0.984184	0.956868	1.06354	1.15896	1.17827	1.0099	1.15746	1.18478
DUSP18	dual specificity phosphatase 18		0.796819	0.795028	0.825216	0.925066	0.789986	0.952541	0.840683	1.09439
DMGDH	dimethylglycine dehydrogenase precursor		0.950407	1.10809	1.13459	0.908612	0.79877	0.933426	1.12543	1.02042
POLR2D	polymerase (RNA) II (DNA directed) polypeptide D		1.26426	1.27581	1.50255	1.08865	1.01024	1.13368	1.21544	1.3694
CHDH	choline dehydrogenase		0.907508	0.926228	0.962199	1.0642	0.949869	0.913383	0.980562	1.07647
NDUFA7	NADH dehydrogenase (ubiquinone) 1 alpha subcomplex, 7 (B14.5a)		0.883698	0.957158	1.02317	0.930819	0.870596	0.841192	0.92847	1.03939
ENOX1	ecto-NOX disulfide-thiol exchanger 1		0.966558	0.787455	0.999267	0.884358	0.893525	0.893448	1.12306	0.897635
MRPL45	mitochondrial ribosomal protein L45		1.14469	1.21258	1.22417	1.33818	1.04842	1.01637	1.13492	1.17191
IGF1	insulin-like growth factor 1		0.973023	0.956872	1.09519	0.972503	0.971369	0.998525	1.15913	1.06459
PGK1	phosphoglycerate kinase 1		0.890014	0.868107	1.11402	1.26128	1.02066	1.0711	0.76522	1.08952
CSDE1	cold shock domain containing E1, RNA binding		0.973563	1.11868	1.1654	1.03063	0.968932	0.966307	1.11845	1.11004
CYB5B	cytochrome b5 type B		0.848119	0.996521	1.05261	1.11918	1.06555	1.21971	1.12383	1.23947
TIMM44	translocase of inner mitochondrial membrane 44		0.980546	1.02013	1.12703	1.01114	0.86915	0.828544	0.899291	1.02362
PPP1CA	protein phosphatase 1, catalytic subunit, alpha isoform		0.994527	0.982213	1.04298	1.15874	0.954511	0.970564	1.07056	1.01163
BAX	BCL2-associated X protein		1.06443	0.945051	1.03829	1.13574	0.987399	0.924581	0.900538	1.22954
GCDH	glutaryl-Coenzyme A dehydrogenase		1.00086	1.03569	1.09103	1.08174	0.876732	0.958982	1.02838	1.0459
PHB	prohibitin		0.968093	1.08044	1.09891	1.00585	0.857673	0.867978	0.96641	1.06725
AP2M1	adaptor protein complex AP-2, mu1		1.06794	1.28006	1.40307	1.10437	1.18095	1.45673	1.58802	1.37121
NDUFB10	NADH dehydrogenase (ubiquinone) 1 beta subcomplex, 10		1.05551	1.17069	1.22879	1.00908	0.953428	0.936439	1.12922	1.14215
ATP6V1B2	ATPase, H+ transporting, lysosomal V1 subunit B2		1.14735	1.12157	1.11855	1.40662	1.01977	0.922404	0.946769	1.13538
SLC25A39	solute carrier family 25, member 39		1.05998	1.04505	1.05811	1.19347	1.02847	0.934649	1.09749	1.10124
2610024G14RIK	RIKEN cDNA 2610024G14 gene		0.903124	1.0277	1.0727	0.955753	0.965744	0.939034	0.968849	1.19288
PARK7	Parkinson disease (autosomal recessive, early onset) 7		1.03465	1.09788	1.1715	1.09885	1.04258	0.983848	1.12009	1.15136
PRODH2	proline dehydrogenase (oxidase) 2		1.02237	1.08587	1.11135	1.06305	0.89741	0.861492	0.996164	1.05232
TMEM70	transmembrane protein 70		1.06846	0.989032	1.12995	0.935538	0.839948	0.894912	0.986722	1.08625
ATP5J2	ATP synthase, H+ transporting, mitochondrial F0 complex, subunit F2		1.03222	1.0111	1.13185	1.06359	0.989954	0.948734	1.07256	1.07525
VDAC2	voltage-dependent anion channel 2		1.0717	0.990778	1.1245	1.0234	0.957935	0.90112	1.03713	1.09219
OXA1L	oxidase assembly 1-like		1.13704	1.14966	1.1786	1.24279	1.15477	1.05171	1.23728	1.24063
CRYZ	crystallin, zeta		1.02819	0.980415	1.132	1.02663	0.924094	1.01265	1.04888	1.09364
BNIP3	BCL2/adenovirus E1B interacting protein 3		0.819705	0.932858	0.979053	0.821706	0.839544	0.826061	0.913382	1.00917
UQCRC2	ubiquinol cytochrome c reductase core protein 2		1.00232	1.07135	1.07976	1.0822	0.966929	0.967234	1.10213	1.09724
NDUFS8	NADH dehydrogenase (ubiquinone) Fe-S protein 8		0.893704	0.981737	1.06355	1.02979	1.00129	1.01024	1.03922	1.09457
COX6C	cytochrome c oxidase, subunit VIc		0.949846	0.979102	1.0733	1.07315	0.987758	1.0508	1.11927	1.0464
MFN1	mitofusin 1		1.08519	1.10678	1.1611	1.10455	1.01568	0.93043	1.1208	1.10713
SUN1	Sad1 and UNC84 domain containing 1		1.01792	1.02416	1.03561	0.990486	0.871528	0.759089	0.941358	1.01901
CYP1A2	cytochrome P450, family 1, subfamily a, polypeptide 2		0.917749	1.17159	1.06655	1.04584	0.993181	1.27569	1.3334	1.28358
PHB2	prohibitin 2		0.978343	1.0408	1.05898	1.07949	0.965495	0.853584	1.004	1.02094
SFXN3	sideroflexin 3		1.13046	0.934227	0.968964	1.10867	1.08878	0.993269	1.04054	1.37943
SLC25A13	solute carrier family 25 (mitochondrial carrier, adenine nucleotide translocator), member 13		0.995702	1.00099	1.1004	1.05709	1.0748	0.959303	1.10723	1.10445
NDUFB2	NADH dehydrogenase (ubiquinone) 1 beta subcomplex, 2		0.870726	0.932034	0.961728	1.00097	0.765164	0.810994	0.884855	0.814291
SCCPDH	saccharopine dehydrogenase (putative)		1.05047	1.1857	1.23153	1.22833	0.921634	1.01379	0.970425	1.08933
UCHL1	ubiquitin carboxy-terminal hydrolase L1		0.901525	1.15929	0.999043	1.11329	0.913059	0.98607	1.1202	1.05751
PGM2	phosphoglucomutase 2		0.95755	1.03654	1.07135	1.00363	0.901724	0.889938	1.03218	0.990755
VGF	VGF nerve growth factor inducible		1.158	0.897	1.09212	1.05623	0.869818	0.990865	1.34051	0.748079
CRLS1	cardiolipin synthase 1		0.884318	1.00073	1.1784	0.935213	0.885093	0.929262	0.85996	1.02138
SLC25A21	solute carrier family 25 (mitochondrial oxodicarboxylate carrier), member 21		0.967518	0.97651	1.18924	1.03862	1.05211	0.942112	1.07216	0.952771
COX5B	cytochrome c oxidase, subunit Vb		0.954475	1.04723	1.14141	1.00234	0.979738	0.907528	1.00462	1.05068
4930455C21RIK	RIKEN cDNA 4930455C21 gene		1.03382	1.02568	1.04145	1.06514	1.05716	0.928417	1.09498	1.16482
ACADVL	acyl-Coenzyme A dehydrogenase, very long chain		0.823863	1.06783	1.00216	0.980223	0.822042	0.777579	0.874262	0.910993
GM6293	predicted pseudogene 6293		0.839082	0.989797	1.07863	0.913046	1.01962	1.1293	1.10522	1.19359
NNT	nicotinamide nucleotide transhydrogenase		1.01978	1.06458	1.1197	1.22075	0.942805	0.92702	0.833985	1.09041
ATP6V1A	ATPase, H+ transporting, lysosomal V1 subunit A		0.999396	1.00995	1.08517	1.20388	1.00449	1.02245	0.927093	1.13673
NDUFAF1	NADH dehydrogenase (ubiquinone) 1 alpha subcomplex, assembly factor 1		1.06625	1.03623	1.11481	0.948382	0.76135	0.856997	0.904703	1.04382
NDUFA3	NADH dehydrogenase (ubiquinone) 1 alpha subcomplex, 3		0.89586	1.05409	1.13293	1.01728	0.902925	0.887072	0.977961	0.902819
TBRG4	transforming growth factor beta regulated gene 4		1.1638	1.09703	1.19691	1.07148	1.00853	0.937985	1.09527	1.17078
ETFDH	electron transferring flavoprotein, dehydrogenase		0.810344	0.983893	1.03866	0.940691	0.754963	0.843262	0.8334	0.83989
PPA1	pyrophosphatase (inorganic) 1		1.01384	1.0239	1.04569	1.04718	0.846984	0.824512	0.892857	1.00778
SQRDL	sulfide quinone reductase-like (yeast)		0.931435	0.96389	1.02996	1.00199	0.947734	0.972935	1.11254	0.963551
SLC25A29	solute carrier family 25 (mitochondrial carrier, palmitoylcarnitine transporter), member 29		1.0412	1.14253	1.48883	1.26315	1.08272	1.13992	0.95231	1.03865
VDAC1	voltage-dependent anion channel 1		1.04801	1.03793	1.08546	0.984573	0.992603	0.959699	1.09002	1.17772
PPP3CB	protein phosphatase 3, catalytic subunit, beta isoform		0.991852	0.998367	1.19881	1.10286	1.15692	1.122	1.12755	1.15645
NDUFB3	NADH dehydrogenase (ubiquinone) 1 beta subcomplex 3		0.87646	1.22124	1.37758	0.948754	0.779284	0.882601	0.862451	0.847818
ATP6V1E2	ATPase, H+ transporting, lysosomal V1 subunit E2		1.12326	1.01764	1.23612	1.09781	1.0695	1.16313	1.35787	1.00315
DNAHC2	dynein, axonemal, heavy chain 2		1.03719	0.988851	1.16431	1.14411	1.15412	1.13411	1.25793	1.06195
ACADM	acyl-Coenzyme A dehydrogenase, medium chain		0.885106	0.997886	1.00015	1.02966	0.810626	0.842884	0.826474	0.936919
PYCR1	pyrroline-5-carboxylate reductase 1		0.974517	0.894066	0.966288	1.09155	0.951417	0.886372	1.07229	0.844845
GPX4	glutathione peroxidase 4		1.05819	0.64033	0.792398	0.725346	0.72595	0.647148	0.79375	0.980443
TIMM8B	translocase of inner mitochondrial membrane 8 homolog b (yeast)		0.9174	0.951688	1.00308	0.904739	0.891132	0.91062	0.997576	1.02583
PTH	parathyroid hormone		1.13027	1.03809	1.05568	1.0425	0.990604	0.948886	1.12323	1.17775
CPT2	carnitine palmitoyltransferase 2		0.859402	1.02939	1.02847	1.00606	0.865758	0.861586	0.883681	0.953053
HSD3B6	hydroxy-delta-5-steroid dehydrogenase, 3 beta- and steroid delta-isomerase 6		0.904036	0.987585	1.17888	0.731596	1.02247	0.998052	1.21996	1.05709
CLTC	clathrin, heavy polypeptide (Hc)		1.009	1.08659	1.06943	1.11079	1.01084	0.980545	1.00704	1.18527
SLC25A19	solute carrier family 25 (mitochondrial thiamine pyrophosphate carrier), member 19		1.08233	1.07875	1.19342	1.13127	0.959904	1.03187	0.979089	1.13886
IDH3G	isocitrate dehydrogenase 3 (NAD+), gamma		1.04676	1.06096	1.08995	1.11368	1.01226	0.972665	1.06556	1.10769
CALM3	calmodulin 3		1.04277	0.918221	1.00478	1.04746	1.03872	0.899291	1.02549	1.09204
MTOR	mechanistic target of rapamycin (serine/threonine kinase)		1.04921	1.08588	1.12785	1.06805	0.982644	0.950763	1.01707	1.13425
ATP5D	ATP synthase, H+ transporting, mitochondrial F1 complex, delta subunit		0.972479	0.993665	1.02261	1.08668	1.00465	0.971619	1.03503	1.06573
SNN	stannin		0.88069	0.780299	0.883347	1.18146	0.970181	1.19537	1.05969	0.959966
TIMM50	translocase of inner mitochondrial membrane 50 homolog (yeast)		0.995088	0.997864	1.01038	1.04656	0.935078	0.935275	0.983997	1.08155
CDK5	cyclin-dependent kinase 5		1.09526	1.01559	1.14395	1.13643	1.0412	0.940279	1.02189	1.06395
BCL2	B-cell leukemia/lymphoma 2		1.11529	1.05	1.10187	1.36795	1.20134	1.11724	1.0881	1.22454
APAF1	apoptotic peptidase activating factor 1		1.05112	1.29487	1.205	1.40621	1.08322	1.22086	1.05516	1.28929
SAMM50	sorting and assembly machinery component 50 homolog (S. cerevisiae)		1.04655	1.07557	1.07324	1.07944	0.998845	0.865168	1.05829	1.0367
CYBASC3	cytochrome b, ascorbate dependent 3		1.09259	1.16406	1.12827	1.29963	0.954021	0.999528	0.980588	1.07458
FRRS1	ferric-chelate reductase 1		0.974666	1.04223	1.09121	1.25297	1.24569	0.926022	1.05837	1.05746
ALDH5A1	aldhehyde dehydrogenase family 5, subfamily A1		0.972747	0.972965	1.1149	0.99782	0.954736	0.9356	0.993144	0.977518
MRPL17	mitochondrial ribosomal protein L17		0.977031	1.03108	0.995872	0.996754	0.957577	0.846465	1.04087	1.01983
ATPIF1	ATPase inhibitory factor 1		1.04263	1.00804	1.09714	1.26287	0.913429	0.893552	0.889401	0.851129
MTHFD1	methylenetetrahydrofolate dehydrogenase (NADP+ dependent), methenyltetrahydrofolate cyclohydrolase, formyltetrahydrofolate synthase		1.01479	1.02247	1.06583	0.95738	0.843576	0.844882	0.970254	0.966057
TAZ	tafazzin		1.1103	1.13445	1.07985	1.06728	1.00115	0.984568	1.195	1.15288
DNAJC19	DnaJ (Hsp40) homolog, subfamily C, member 19		1.12382	1.0774	1.17804	1.18771	1.06064	1.05299	1.18649	1.03234
GIMAP5	GTPase, IMAP family member 5		0.868559	0.91541	1.01302	1.0587	1.0873	0.88756	0.923494	0.998206
TXN2	thioredoxin 2		1.03033	1.07987	1.03718	1.05326	1.02473	0.953028	1.15424	1.09708
MPST	mercaptopyruvate sulfurtransferase		1.01965	1.0434	1.05741	0.908174	0.82608	0.840533	0.980004	1.01494
ETFB	electron transferring flavoprotein, beta polypeptide		0.946029	1.04234	1.04284	1.02602	0.910607	0.901452	0.970391	0.992537
GM12251	predicted gene 12251		0.910526	1.10682	1.10051	1.06466	0.967107	0.877489	1.01613	0.912342
CYP11A1	cytochrome P450, family 11, subfamily a, polypeptide 1		0.825079	0.778551	0.860737	0.922689	0.918772	0.796677	0.881022	0.850818
ALDOC	aldolase C, fructose-bisphosphate		1.27612	1.23581	1.16858	1.17114	0.975769	0.775316	1.0709	1.10206
COX17	cytochrome c oxidase, subunit XVII assembly protein homolog (yeast)		0.977584	1.02765	1.09842	0.96355	0.784764	1.08301	0.856859	1.18098
NXN	nucleoredoxin		1.35207	1.27301	1.34623	1.35891	1.39007	1.07547	1.37555	1.30758
TXNRD3	thioredoxin reductase 3		0.888766	1.0072	0.97131	0.909526	1.08282	0.82572	0.913661	1.23243
GMPR	guanosine monophosphate reductase		1.01446	0.841414	0.938746	1.15334	1.15031	1.11708	1.03094	1.24
GRIN2A	glutamate receptor, ionotropic, NMDA2A (epsilon 1)		1.04702	1.15432	1.04627	1.09318	0.853104	1.19981	1.23879	1.12129
FADS2	fatty acid desaturase 2		0.986081	0.882321	0.94941	1.06841	0.969493	0.906975	0.937893	1.00136
ATP5S	ATP synthase, H+ transporting, mitochondrial F0 complex, subunit s		0.890998	1.11525	0.97724	0.965531	0.758837	0.95949	0.999198	0.992572
NDUFB7	NADH dehydrogenase (ubiquinone) 1 beta subcomplex, 7		0.992214	0.973002	1.09585	0.963775	0.814768	0.762821	0.834922	0.847584
SH3GLB1	SH3-domain GRB2-like B1 (endophilin)		0.94581	1.04501	1.12407	1.05342	1.03107	1.11669	1.14824	1.04121
GJA1	gap junction protein, alpha 1		1.07879	0.976532	1.07866	1.18577	1.26525	0.994964	0.980667	1.30753
MRS2	MRS2 magnesium homeostasis factor homolog (S. cerevisiae)		1.23768	1.11578	1.09748	1.19237	1.01574	1.18547	1.09426	1.41578
HSPD1	heat shock protein 1 (chaperonin)		1.04809	1.07557	1.00831	1.05529	0.8494	0.850168	0.923928	1.03915
TOMM7	translocase of outer mitochondrial membrane 7 homolog (yeast)		1.0589	0.959975	1.09739	1.04856	0.846863	0.996137	0.921804	0.998682
CACNA1F	calcium channel, voltage-dependent, alpha 1F subunit		0.968725	1.07163	1.10959	1.00608	1.002	1.13415	1.17714	1.10266
SDHC	succinate dehydrogenase complex, subunit C, integral membrane protein		1.16972	1.12908	1.18954	1.13613	0.973547	0.927113	1.03199	1.05942
MLXIP	MLX interacting protein		0.924966	0.91201	0.952609	1.02691	0.906331	0.781942	0.748349	0.975971
SLC25A17	solute carrier family 25 (mitochondrial carrier, peroxisomal membrane protein), member 17		1.0294	1.05754	1.06517	1.04809	1.0132	0.995753	1.09041	1.0973
MAPK1	mitogen-activated protein kinase 1		1.0187	1.00357	1.04544	1.00557	1.04343	0.991645	1.08332	1.12474
MPV17	MpV17 mitochondrial inner membrane protein		1.02306	0.948939	0.998896	1.11276	1.06156	1.05004	1.01435	1.15283
SURF1	surfeit gene 1		0.924326	0.949806	1.02047	1.06207	0.947687	0.907012	0.903421	0.920628
CR1L	complement component (3b/4b) receptor 1-like		0.843652	1.031	0.972848	1.07325	1.15993	1.06194	1.13717	1.10376
PSEN1	presenilin 1		1.0202	1.09811	1.09956	1.18592	1.05617	1.03156	1.07236	1.03838
NDUFS7	NADH dehydrogenase (ubiquinone) Fe-S protein 7		0.997686	0.958601	1.00584	1.05957	1.00275	0.984074	1.01211	1.04297
NAT8L	N-acetyltransferase 8-like		0.861668	0.882455	1.00294	1.02894	1.03578	1.21181	1.19088	0.945026
CPT1C	carnitine palmitoyltransferase 1c		1.19065	0.983086	1.04729	1.21831	1.05027	1.10517	1.23206	1.02216
TOMM6	translocase of outer mitochondrial membrane 6 homolog (yeast)		1.02696	1.09066	1.05044	0.989015	0.964013	0.801911	1.0217	0.993155
GPR37	G protein-coupled receptor 37		1.08668	0.930463	1.10544	1.32073	1.29424	1.18829	1.27441	0.996884
NDUFS3	NADH dehydrogenase (ubiquinone) Fe-S protein 3		1.03081	1.11347	1.06902	1.0949	0.957848	0.942024	1.10693	0.950022
FASTKD2	FAST kinase domains 2		1.18118	1.04575	1.0912	0.963832	1.14291	0.852256	0.987116	1.36304
SLC25A45	solute carrier family 25, member 45		1.08578	1.09317	0.999774	1.2207	1.09264	1.10789	1.14821	1.19513
CDK5R1	cyclin-dependent kinase 5, regulatory subunit 1 (p35)		1.10493	0.861854	0.953997	1.05209	0.925086	0.947342	1.19655	0.798094
PIPOX	pipecolic acid oxidase		0.990183	1.02983	1.11241	0.983332	1.07373	1.04817	1.13712	1.08273
CKMT1	creatine kinase, mitochondrial 1, ubiquitous		0.866974	0.893236	0.93631	0.995996	1.24765	0.979127	1.24002	0.981169
FDX1L	ferredoxin 1-like		0.981569	0.995061	1.02254	1.0566	1.02462	1.08685	1.057	1.12
ITPR2	inositol 1,4,5-triphosphate receptor 2		1.03969	0.979559	1.08745	1.09415	1.01879	0.889933	0.901869	1.00594
PPP3CA	protein phosphatase 3, catalytic subunit, alpha isoform		1.14264	1.03996	1.13806	0.97315	0.981672	0.97044	1.03211	1.15678
NDUFS6	NADH dehydrogenase (ubiquinone) Fe-S protein 6		1.00809	0.999822	1.13074	0.998181	0.936994	0.866215	0.873217	0.956792
FECH	ferrochelatase		0.936543	0.985039	1.0138	0.996982	1.06197	1.13885	1.13818	1.1321
PLCD1	phospholipase C, delta 1		1.13261	0.93664	1.01412	1.00779	1.14014	0.941921	1.05956	1.22821
CASP7	caspase 7		1.20884	1.02548	1.13886	0.95995	0.974272	0.95434	1.11372	1.10363
RHOT2	ras homolog gene family, member T2		1.12364	1.06766	1.04163	1.14335	1.06952	0.997339	1.02833	1.19711
SLC25A1	solute carrier family 25 (mitochondrial carrier, citrate transporter), member 1		1.0278	0.951833	0.962758	1.04189	1.07533	1.01066	1.09413	1.11151
MFN2	mitofusin 2		1.04075	1.01037	1.03509	0.948358	0.945469	0.905827	0.985023	1.06898
SLC25A10	solute carrier family 25 (mitochondrial carrier, dicarboxylate transporter), member 10		1.06829	0.974938	1.0883	1.02396	1.05147	0.941256	1.06314	0.999276
PLCB4	phospholipase C, beta 4		1.09138	1.16868	1.21921	1.08905	1.22489	1.18595	1.09439	1.42258
NDUFA13	NADH dehydrogenase (ubiquinone) 1 alpha subcomplex, 13		1.00598	0.908008	0.990832	1.09046	1.06937	1.05068	1.10061	0.984294
PRKAR2B	protein kinase, cAMP dependent regulatory, type II beta		1.01992	0.914222	1.16204	0.998827	0.979434	1.12401	1.01577	0.988489
SLC25A23	solute carrier family 25 (mitochondrial carrier /// phosphate carrier), member 23		0.938881	0.956729	0.995553	1.00082	1.14461	1.03234	1.13364	1.07051
BCS1L	BCS1-like (yeast)		1.04237	1.07897	1.1158	0.999029	1.02705	0.932097	0.946145	1.14358
TMEM11	transmembrane protein 11		1.13188	1.07141	1.11778	1.05446	0.988075	0.9496	1.00572	1.08219
MTHFD2	methylenetetrahydrofolate dehydrogenase (NAD+ dependent), methenyltetrahydrofolate cyclohydrolase		1.08012	1.0181	1.18363	1.62281	1.45235	1.01434	0.863621	1.02476
2010110P09RIK	RIKEN cDNA 2010110P09 gene		1.09425	1.01184	0.954437	1.11868	1.13882	1.19365	1.27475	1.21385
ECSIT	ECSIT homolog (Drosophila)		1.14718	1.15925	1.06052	1.06005	1.05532	0.830552	1.05641	1.13158
ATP5J	ATP synthase, H+ transporting, mitochondrial F0 complex, subunit F		1.0446	1.02449	1.07807	1.02525	1.04843	1.0102	0.993175	1.14354
ABCB8	ATP-binding cassette, sub-family B (MDR/TAP), member 8		0.994781	1.11995	1.01616	1.07803	1.04475	0.84336	0.897174	1.11931
MFF	mitochondrial fission factor		1.06673	1.01637	1.06309	1.06619	0.981661	1.01268	0.984884	1.0731
DNM1L	dynamin 1-like		1.08362	1.06068	1.06252	1.04739	1.07185	1.01918	1.03334	1.2033
MTX1	metaxin 1		1.05261	1.10806	1.1343	1.14805	1.1474	1.11356	0.97756	1.27043
FIS1	fission 1 (mitochondrial outer membrane) homolog (yeast)		1.06792	1.0472	1.02934	1.07993	1.16012	1.04155	1.09648	1.20658
MTFP1	mitochondrial fission process 1		1.18721	1.1671	1.03415	1.04966	0.952954	0.890016	1.10887	1.0936
MAVS	mitochondrial antiviral signaling protein		1.15279	1.1305	1.09465	1.22007	1.18275	1.07933	1.04386	1.26241
GRIN2C	glutamate receptor, ionotropic, NMDA2C (epsilon 3)		1.17685	1.14987	1.25788	1.20769	1.16982	1.52113	1.58114	1.04807
MUL1	mitochondrial ubiquitin ligase activator of NFKB 1		1.11574	1.05575	1.0538	1.00173	1.07439	0.946204	1.0843	1.10829
CYBA	cytochrome b-245, alpha polypeptide		1.15842	0.98439	1.02871	1.3636	1.39509	1.30773	1.09426	1.41891
MAPK3	mitogen-activated protein kinase 3		1.03438	0.992961	1.04109	1.12119	1.34262	1.05545	1.10982	1.2038
MARCH3	membrane-associated ring finger (C3HC4) 3		1.16109	1.11864	1.13198	1.12387	0.985236	1.16394	1.14606	1.07117
CASP12	caspase 12		1.24839	1.30949	1.14901	1.10503	1.25913	0.974315	1.30283	1.26146

## Sheet: Oxidative_stress_response
Gene name	description		LF-NP_1W	HF-NP_1W	LF-HP_1W	HF-HP_1W	LF-NP_12W	HF-NP_12W	LF-HP_12W	HF-HP_12W
GPX6	glutathione peroxidase 6		0.921029	0.993545	4.70015	1.80787	0.677008	0.968773	5.02534	4.80177
CYP2B10	cytochrome P450, family 2, subfamily b, polypeptide 10		0.825579	2.12478	6.89884	4.56992	0.548206	0.849409	0.688811	1.33723
NNMT	nicotinamide N-methyltransferase		0.975045	0.99496	2.31462	2.24585	0.843304	1.0321	2.01281	2.58561
GSTM3	glutathione S-transferase, mu 3		1.28555	1.27027	1.84372	4.80299	1.3769	0.887207	1.62365	1.71676
GSTA2	glutathione S-transferase, alpha 2 (Yc2)		0.78241	0.863807	1.81131	1.87398	0.669376	0.898187	1.04306	1.72727
CYP17A1	cytochrome P450, family 17, subfamily a, polypeptide 1		0.7472	0.810113	2.14944	1.93916	0.830065	0.59939	0.536938	1.30865
PPAT	phosphoribosyl pyrophosphate amidotransferase		1.25358	1.31542	2.26266	2.25166	1.10779	0.900717	1.81182	2.6816
GSTT3	glutathione S-transferase, theta 3		1.0899	0.855719	2.68001	1.6043	1.01876	1.01302	1.67199	1.6649
CYP39A1	cytochrome P450, family 39, subfamily a, polypeptide 1		1.01992	0.774938	2.02331	2.06622	1.24329	0.505053	1.15561	1.3313
GPX3	glutathione peroxidase 3		0.995529	1.36244	1.44457	4.15737	1.12702	1.07537	1.1916	1.41588
GSTA4	glutathione S-transferase, alpha 4		1.09597	1.03224	1.5621	1.98573	1.3695	1.07317	1.59021	2.31437
CTH	cystathionase (cystathionine gamma-lyase)		0.937419	1.03887	1.49652	1.56018	0.820452	0.770202	1.23303	1.52503
FMO4	flavin containing monooxygenase 4		1.01746	1.09032	1.83044	1.55947	0.762977	0.793843	1.26159	1.30474
GSTM2	glutathione S-transferase, mu 2		0.965191	0.84487	1.81411	1.12568	1.01169	0.930342	1.6784	1.46115
IDH2	isocitrate dehydrogenase 2 (NADP+), mitochondrial		0.977776	1.05693	1.52604	1.55191	0.939687	0.872068	1.35989	1.63667
SULT1E1	sulfotransferase family 1E, member 1		1.07391	0.944442	2.71679	0.979323	0.812511	0.862311	1.06556	0.999072
FMO3	flavin containing monooxygenase 3		1.22911	1.18071	3.0271	1.4845	0.775873	0.9453	0.964673	0.962319
CYP4A14	cytochrome P450, family 4, subfamily a, polypeptide 14		0.411995	1.0271	1.17364	1.09741	0.519771	0.58427	0.745677	0.915552
FMO2	flavin containing monooxygenase 2		1.14931	1.24173	2.55997	1.35466	0.870316	0.707652	1.08516	0.991659
CYP21A1	cytochrome P450, family 21, subfamily a, polypeptide 1		0.991166	1.11007	0.982807	1.02977	1.06592	1.03876	1.9383	2.32697
GSTO1	glutathione S-transferase omega 1		0.96774	1.03263	1.40285	1.54961	0.9909	0.892546	1.31932	1.46301
PFKP	phosphofructokinase, platelet		1.24784	1.20523	1.12962	2.11812	1.39543	1.03394	1.29534	2.54967
UGDH	UDP-glucose dehydrogenase		0.899207	0.945993	1.2592	1.47033	0.830272	0.852469	0.922456	1.30444
CYP46A1	cytochrome P450, family 46, subfamily a, polypeptide 1		1.28593	1.03347	1.29094	1.21207	1.30058	1.25365	2.07742	2.19496
GSTT2	glutathione S-transferase, theta 2		1.06979	1.1809	1.46014	1.2048	0.877218	0.749611	1.32825	1.30204
GSTM7	glutathione S-transferase, mu 7		0.971571	1.17409	1.46959	1.44955	1.01855	1.00221	1.32828	1.36565
GNMT	glycine N-methyltransferase		1.00836	1.00056	1.40836	1.14869	0.938686	0.887381	1.25809	1.31273
PDSS1	prenyl (solanesyl) diphosphate synthase, subunit 1		0.964866	1.05851	1.02251	1.2644	0.913071	0.786421	1.27342	1.41141
RRM1	ribonucleotide reductase M1		0.887908	0.884241	0.966621	1.60555	1.01729	0.90988	0.957178	1.4056
GSTK1	glutathione S-transferase kappa 1		0.887757	1.07452	1.39982	1.36953	0.972763	1.06996	1.22346	1.23831
UGT1A9	UDP glucuronosyltransferase 1 family, polypeptide A9		1.13849	1.08449	1.45654	1.13182	0.874003	0.574239	0.895183	1.26718
UGT1A10	UDP glycosyltransferase 1 family, polypeptide A10		0.615542	0.819039	0.937394	0.512214	0.588066	0.383974	0.550411	1.0813
GSTM4	glutathione S-transferase, mu 4		1.00739	0.926391	1.33346	1.4802	1.12531	1.00344	1.14278	1.24035
GGT6	gamma-glutamyltransferase 6		1.03833	1.0372	1.28079	1.26761	1.15756	1.03869	1.58107	1.30742
EEF1E1	eukaryotic translation elongation factor 1 epsilon 1		1.22274	1.10217	1.22303	1.36146	0.95744	0.93399	1.14188	1.56623
CYP51	cytochrome P450, family 51		0.648346	1.13618	0.969427	1.26086	0.605673	1.00435	0.963609	1.03925
ALDH1A7	aldehyde dehydrogenase family 1, subfamily A7		0.8449	1.00659	1.22594	1.07933	0.707423	0.945686	0.971609	1.08553
GSTM6	glutathione S-transferase, mu 6		1.05859	1.1669	1.58117	1.27212	1.16129	1.17027	1.60257	1.13897
GM4845	predicted gene 4845		1.14443	1.04971	1.54724	1.33563	1.15427	1.14432	1.33696	1.28623
CDA	cytidine deaminase		0.989064	0.971994	1.21172	1.23145	0.810201	0.831469	1.00743	0.923958
SULT1A1	sulfotransferase family 1A, phenol-preferring, member 1		0.892008	0.820011	1.22628	0.805776	0.839854	0.790279	1.0225	0.991423
HSD17B10	hydroxysteroid (17-beta) dehydrogenase 10		0.862614	1.04979	1.2863	1.05883	0.776335	0.853028	0.964717	0.932164
FDPS	farnesyl diphosphate synthetase		0.740469	0.884815	0.715647	0.985667	0.607153	0.692149	0.841566	0.941367
CYP2C68	cytochrome P450, family 2, subfamily c, polypeptide 68		0.836624	0.917752	1.17462	0.891633	0.881941	1.01075	1.32154	0.945132
GFPT1	glutamine fructose-6-phosphate transaminase 1		0.935973	1.13935	1.10989	1.17174	0.798242	0.944928	1.01842	1.18135
EEF1G	eukaryotic translation elongation factor 1 gamma		1.43753	1.30831	1.27968	1.37524	1.07333	0.894481	1.16375	1.6935
ODC1	ornithine decarboxylase, structural 1		1.00571	1.16827	1.16881	1.10588	0.858223	0.917616	1.14314	1.19351
COX10	COX10 homolog, cytochrome c oxidase assembly protein, heme A: farnesyltransferase (yeast)		1.0335	1.01455	1.04707	1.18864	0.986438	0.858343	1.16372	1.14175
DCTPP1	dCTP pyrophosphatase 1		0.96925	1.02633	1.12653	1.12624	0.953121	0.803688	1.01274	1.0886
NUS1	nuclear undecaprenyl pyrophosphate synthase 1 homolog (S. cerevisiae)		0.928862	0.90714	1.02411	1.02061	0.810114	0.927593	0.95819	1.13381
AHCY	S-adenosylhomocysteine hydrolase		0.977403	0.910508	1.27112	0.91238	0.748758	0.837703	0.838859	0.960379
MAOA	monoamine oxidase A		0.984223	0.867708	1.04514	1.09965	0.990797	0.739232	1.00671	0.95294
CHST11	carbohydrate sulfotransferase 11		0.942043	1.02098	1.12133	1.13271	0.916279	0.934735	0.937084	1.15178
NAA40	N(alpha)-acetyltransferase 40, NatD catalytic subunit, homolog (S. cerevisiae)		0.849607	0.978813	0.899691	1.08622	0.913094	0.87178	0.878689	1.22966
ACOT13	acyl-CoA thioesterase 13		0.92554	0.958698	1.13857	0.996558	0.909343	0.894444	0.986587	1.05476
SMOX	spermine oxidase		0.845551	1.01694	0.884214	1.1474	0.880614	0.89251	0.959885	1.1241
CHST2	carbohydrate sulfotransferase 2		1.18778	1.48404	1.30322	1.65632	1.32377	1.29153	1.55421	1.462
GSR	glutathione reductase		1.08179	1.07093	1.18225	1.2154	0.998223	1.08173	1.12026	1.26445
SULT2A1	sulfotransferase family 2A, dehydroepiandrosterone (DHEA)-preferring, member 1		1.03993	0.842166	1.24076	1.0937	1.08484	0.875704	1.03953	0.955722
PFKM	phosphofructokinase, muscle		1.01891	0.970562	1.06192	1.14614	1.21552	0.869862	1.05562	1.32611
GAL3ST1	galactose-3-O-sulfotransferase 1		0.933115	1.0599	1.22569	1.37149	1.37607	1.35157	1.47779	1.2116
GSTM1	glutathione S-transferase, mu 1		1.12837	0.915156	1.185	1.38886	1.26786	1.16553	1.19188	1.24623
UGT1A7C	UDP glucuronosyltransferase 1 family, polypeptide A7C		0.964294	0.693388	1.18923	0.598337	0.729473	0.411349	0.44968	0.888679
MMAB	methylmalonic aciduria (cobalamin deficiency) type B homolog (human)		1.04854	1.23068	1.0369	1.30434	0.966346	0.913124	1.07629	1.21977
HS3ST3A1	heparan sulfate (glucosamine) 3-O-sulfotransferase 3A1		1.34435	0.953455	1.34719	0.954763	0.92782	1.08983	1.03763	1.46032
HPRT	hypoxanthine guanine phosphoribosyl transferase		0.956105	1.1252	1.16429	1.1493	0.86126	0.951703	1.03474	0.975703
ALDH3B1	aldehyde dehydrogenase 3 family, member B1		1.3869	1.04986	1.31093	1.80172	1.63165	1.35337	1.18811	1.71562
CBR4	carbonyl reductase 4		0.957365	0.921637	1.00771	0.930606	0.794073	0.835821	0.965177	0.98613
CYP7B1	cytochrome P450, family 7, subfamily b, polypeptide 1		0.945904	1.26265	1.04089	1.02345	0.994607	1.04529	1.33511	1.30646
GAL3ST4	galactose-3-O-sulfotransferase 4		0.811909	0.744545	0.954744	0.88666	0.967575	0.83946	0.879352	0.993496
MAT1A	methionine adenosyltransferase I, alpha		0.974411	0.984422	1.13741	1.08052	0.991542	0.977875	1.06395	1.05129
NAT1	N-acetyl transferase 1		0.838693	1.09943	1.18311	0.94273	1.11747	1.13256	1.20436	1.26825
CHST5	carbohydrate (N-acetylglucosamine 6-O) sulfotransferase 5		0.861572	0.935343	1.16359	1.0802	0.922253	0.893594	0.846873	0.87123
CYP2C55	cytochrome P450, family 2, subfamily c, polypeptide 55		1.20288	1.08956	1.04829	1.51292	0.78511	0.986776	0.882743	1.01261
UBIAD1	UbiA prenyltransferase domain containing 1		0.928693	1.02032	0.905717	1.13527	0.85659	0.93987	0.93385	1.13082
AKR1A4	aldo-keto reductase family 1, member A4 (aldehyde reductase)		1.02998	1.01769	1.10799	1.16334	1.01989	1.05094	1.07445	1.1501
CRYZ	crystallin, zeta		1.02819	0.980415	1.132	1.02663	0.924094	1.01265	1.04888	1.09364
FDFT1	farnesyl diphosphate farnesyl transferase 1		0.716377	1.11507	0.933974	1.18915	1.09824	1.21893	1.20414	1.19302
GPX1	glutathione peroxidase 1		0.91645	1.06795	1.11976	1.12894	1.04404	1.09753	1.12433	1.11702
FMO1	flavin containing monooxygenase 1		0.969163	0.98847	1.19224	1.01802	0.902224	0.942326	0.979003	0.939612
NAT14	N-acetyltransferase 14		1.02822	1.13727	1.27389	1.09262	0.956437	1.11679	1.13423	1.10083
CYP1A2	cytochrome P450, family 1, subfamily a, polypeptide 2		0.917749	1.17159	1.06655	1.04584	0.993181	1.27569	1.3334	1.28358
NAT10	N-acetyltransferase 10		1.00667	1.13654	1.10098	1.1255	0.963557	0.862069	0.987	1.09298
CYP20A1	cytochrome P450, family 20, subfamily A, polypeptide 1		1.00266	1.0365	1.06659	1.11833	0.9487	0.815533	0.916318	1.01909
GSTM5	glutathione S-transferase, mu 5		0.929835	0.88574	1.11753	0.954163	1.05803	0.87019	0.839539	1.14296
ACACB	acetyl-Coenzyme A carboxylase beta		0.833734	0.865024	0.802418	0.830472	0.637438	0.652187	0.840661	0.76142
HPGDS	hematopoietic prostaglandin D synthase		0.83349	0.833089	0.741124	1.21554	1.22963	1.17421	1.01714	1.42655
HS2ST1	heparan sulfate 2-O-sulfotransferase 1		0.978161	0.911518	0.962389	1.07506	1.0744	0.898233	0.982626	1.13661
FMO5	flavin containing monooxygenase 5		0.956305	1.00203	1.16513	1.0018	0.975838	0.936109	0.942247	1.05567
ACADM	acyl-Coenzyme A dehydrogenase, medium chain		0.885106	0.997886	1.00015	1.02966	0.810626	0.842884	0.826474	0.936919
CYP3A13	cytochrome P450, family 3, subfamily a, polypeptide 13		0.90875	0.98884	1.2915	1.0829	1.02949	1.08839	1.07347	0.85699
GPX4	glutathione peroxidase 4		1.05819	0.64033	0.792398	0.725346	0.72595	0.647148	0.79375	0.980443
UGT2A3	UDP glucuronosyltransferase 2 family, polypeptide A3		0.939579	1.01279	1.08894	0.982493	1.00972	1.17193	1.27688	1.07972
KCNAB1	potassium voltage-gated channel, shaker-related subfamily, beta member 1		1.12568	1.24914	1.14313	1.32398	0.954809	1.18446	1.38524	0.975563
ALDH5A1	aldhehyde dehydrogenase family 5, subfamily A1		0.972747	0.972965	1.1149	0.99782	0.954736	0.9356	0.993144	0.977518
GSS	glutathione synthetase		1.02126	1.02252	0.993661	1.068	0.962104	0.817128	0.940777	1.05709
SRR	serine racemase		0.854469	0.903562	1.00496	0.981983	0.983723	1.06983	0.968082	1.08527
FNTB	farnesyltransferase, CAAX box, beta		1.17536	0.844441	0.94448	0.9447	0.838116	0.825758	1.18	0.834798
CYP4F18	cytochrome P450, family 4, subfamily f, polypeptide 18		1.27131	0.948626	1.07255	1.23524	1.05523	1.09676	1.23137	1.09285
UGP2	UDP-glucose pyrophosphorylase 2		1.10626	0.93826	1.16102	0.940874	1.19271	1.31182	1.51785	1.19803
ALDOC	aldolase C, fructose-bisphosphate		1.27612	1.23581	1.16858	1.17114	0.975769	0.775316	1.0709	1.10206
PAPSS1	3'-phosphoadenosine 5'-phosphosulfate synthase 1		1.06878	1.25058	1.13813	1.27707	1.05758	1.1489	1.0942	1.26012
KCNMA1	potassium large conductance calcium-activated channel, subfamily M, alpha member 1		0.989543	1.02603	0.904187	0.928265	0.904001	0.907997	1.07854	1.11697
ACADL	acyl-Coenzyme A dehydrogenase, long-chain		0.922721	1.05224	1.06599	0.929216	0.811872	0.847891	0.898164	0.914829
TRP63	transformation related protein 63		0.995499	0.880106	0.977195	0.917983	0.963916	1.08658	1.14638	1.06756
SULT2B1	sulfotransferase family, cytosolic, 2B, member 1		1.24424	1.1835	1.28968	1.18239	1.01734	1.2753	1.38901	1.07677
TK1	thymidine kinase 1		0.856494	0.969005	1.01338	0.940309	1.08075	0.838509	0.937187	1.01135
DHPS	deoxyhypusine synthase		1.02717	0.903003	0.894607	0.997689	0.963997	0.796836	0.971314	0.970452
MGST3	microsomal glutathione S-transferase 3		1.12778	1.0328	1.11826	1.1238	1.16526	1.05474	1.17482	1.13209
USP16	ubiquitin specific peptidase 16		0.947078	1.11218	0.996112	0.933916	0.893493	0.863219	0.919229	1.10656
IDE	insulin degrading enzyme		0.958044	1.04506	1.03454	1.05269	0.978324	1.00059	0.99787	1.03638
TRPM8	transient receptor potential cation channel, subfamily M, member 8		0.844915	0.989211	1.20158	0.950729	0.968688	1.07646	0.890645	0.938612
ACADS	acyl-Coenzyme A dehydrogenase, short chain		0.940649	1.03353	1.03123	1.01858	0.931559	0.959935	0.902995	1.00653
CYP2B9	cytochrome P450, family 2, subfamily b, polypeptide 9		0.860618	0.967729	2.16908	1.95204	2.55456	5.80177	4.92131	1.35629
PCBD1	pterin 4 alpha carbinolamine dehydratase/dimerization cofactor of hepatocyte nuclear factor 1 alpha (TCF1) 1		0.919087	1.01313	1.01083	0.989745	0.999957	1.0391	1.06082	0.98894
SOD2	superoxide dismutase 2, mitochondrial		0.981882	1.00668	1.00404	0.953471	0.9029	0.968558	0.96717	0.994955
KCNJ10	potassium inwardly-rectifying channel, subfamily J, member 10		0.979366	1.11474	1.04657	1.45195	1.33442	1.35513	1.02936	1.32275
PCBD2	pterin 4 alpha carbinolamine dehydratase/dimerization cofactor of hepatocyte nuclear factor 1 alpha (TCF1) 2		1.29895	1.20359	1.3256	1.16269	1.06233	1.08052	0.998548	1.14446
SULT1C2	sulfotransferase family, cytosolic, 1C, member 2		1.36731	0.86514	1.2192	1.06898	1.50885	1.22641	1.32425	1.28753

## Sheet: Adaptive_immunity
Gene name	description		LF-NP_1W	HF-NP_1W	LF-HP_1W	HF-HP_1W	LF-NP_12W	HF-NP_12W	LF-HP_12W	HF-HP_12W
INHBA	inhibin beta-A		1.68988	1.07471	0.347756	0.538869	1.30115	1.16413	0.564384	0.327586
KLF10	Kruppel-like factor 10		1.42978	1.67411	0.981989	0.941309	1.2458	1.51708	0.846062	0.605961
EGR1	early growth response 1		1.2263	0.593172	0.509984	0.61145	1.23156	1.23276	0.493619	0.863993
BCL6	B-cell leukemia/lymphoma 6		0.656005	1.48181	0.727229	0.605579	1.09978	1.23558	0.383407	0.977645
ID2	inhibitor of DNA binding 2		1.0937	1.15963	0.654224	0.897817	1.29491	1.44284	0.921254	0.627788
AQP4	aquaporin 4		1.07017	0.8135	0.48423	0.639414	0.742258	1.06474	0.515707	0.850358
RPS6KA1	ribosomal protein S6 kinase polypeptide 1		1.15769	0.905304	0.694215	0.885808	1.47172	1.11219	0.87492	0.723502
IRF1	interferon regulatory factor 1		0.904703	1.11378	0.73939	0.639158	1.11466	1.02736	0.736558	0.747889
IFIT1	interferon-induced protein with tetratricopeptide repeats 1		0.897973	0.888015	0.624665	0.758097	0.92391	0.976382	0.620988	0.559795
H2-DMB1	histocompatibility 2, class II, locus Mb1		0.614134	0.934266	0.54688	0.52594	0.636683	1.61868	1.39938	0.188207
PIM1	proviral integration site 1		0.98536	0.757488	0.779612	0.592629	0.919521	0.890534	0.502697	0.614793
IIGP1	interferon inducible GTPase 1		0.930749	0.952108	0.724142	0.698575	0.886373	0.969103	0.704174	0.52385
C4BP	complement component 4 binding protein		0.970418	1.00058	0.738572	0.75677	1.07967	1.215	0.887413	0.731697
GBP1	guanylate binding protein 1		1.00038	1.45046	0.811258	1.00325	1.39099	1.55538	1.16746	0.959215
GM6749	predicted pseudogene 6749		1.43874	1.12764	0.928169	1.01026	2.11423	0.930879	1.34711	0.817996
IRF2	interferon regulatory factor 2		1.08155	1.02297	0.881929	0.737052	1.1061	0.899031	0.779881	0.616828
CD3E	CD3 antigen, epsilon polypeptide		1.27928	1.28612	0.896314	1.05485	1.53044	1.31089	1.08224	0.935851
IRF9	interferon regulatory factor 9		0.846951	1.00986	0.65117	0.730271	0.96433	0.799238	0.558868	0.727182
RSAD2	radical S-adenosyl methionine domain containing 2		0.901434	0.863702	0.5682	0.648768	0.829235	0.787051	0.537488	0.746687
IRGM2	immunity-related GTPase family M member 2		0.819813	0.932803	0.649082	0.774717	0.92502	0.767775	0.627751	0.501996
RORC	RAR-related orphan receptor gamma		1.04032	0.980212	0.730645	0.698876	1.01927	0.990215	0.857889	0.706775
PTK2B	PTK2 protein tyrosine kinase 2 beta		1.05545	1.02264	0.781418	0.896736	1.0988	1.04103	0.75578	0.750764
SLC11A2	solute carrier family 11 (proton-coupled divalent metal ion transporters), member 2		1.03286	1.17621	0.823465	0.862629	1.05514	1.02688	0.71339	0.850762
PML	promyelocytic leukemia		0.952135	0.972843	0.69702	0.820719	1.18824	0.905029	0.814743	0.733382
CD74	CD74 antigen (invariant polypeptide of major histocompatibility complex, class II antigen-associated)		1.11274	1.52482	0.758405	1.408	1.56233	1.92624	1.18121	1.35055
SFPI1	SFFV proviral integration 1		1.05869	1.14567	0.641336	1.02832	1.38274	1.50217	0.994982	1.24214
KLF13	Kruppel-like factor 13		0.913947	0.879294	0.683218	0.742031	0.963687	0.834891	0.684743	0.654901
H2-DMA	histocompatibility 2, class II, locus DMa		1.27899	1.60749	0.686682	1.65856	1.92282	2.07264	1.23415	1.71947
STAP1	signal transducing adaptor family member 1		0.748057	0.61576	0.47186	0.552147	0.670823	0.765047	0.516829	0.622032
CBLB	Casitas B-lineage lymphoma b		0.978021	1.07279	0.899751	0.922574	1.10652	0.969104	0.574877	0.796077
IL1B	interleukin 1 beta		1.3176	1.30253	1.10949	1.03581	1.50716	1.45428	1.08425	1.08987
CSF1	colony stimulating factor 1 (macrophage)		1.42698	1.23693	1.1243	1.10959	1.77421	1.52449	1.3175	1.06522
IHH	Indian hedgehog		1.13522	1.3222	0.953225	0.936122	1.47482	1.2405	1.20615	0.937609
C1S	complement component 1, s subcomponent		0.960463	0.827477	0.694224	0.701125	1.08958	1.07718	0.994639	0.707987
PSMB9	proteasome (prosome, macropain) subunit, beta type 9 (large multifunctional peptidase 2)		1.12242	1.0759	0.855367	0.829349	1.11907	1.21921	0.948961	0.933807
IL1RAP	interleukin 1 receptor accessory protein		1.11255	1.00674	0.878991	0.778821	1.1199	1.17676	0.908702	0.90888
TAP1	transporter 1, ATP-binding cassette, sub-family B (MDR/TAP)		1.06565	1.07254	0.795707	0.87145	1.18934	1.00509	0.922621	0.821424
LILRB3	leukocyte immunoglobulin-like receptor, subfamily B (with TM and ITIM domains), member 3		0.874227	1.13582	0.941059	0.91578	1.33259	1.03623	0.771044	0.831192
IKBKG	inhibitor of kappaB kinase gamma		0.846784	1.00445	0.744265	0.719993	0.867614	0.825037	0.57095	0.777294
HIST1H4C	histone cluster 1, H4c		0.71988	0.870534	0.693674	0.718094	1.04348	1.07912	1.02207	0.521329
C6	complement component 6		0.94693	1.14339	0.753067	0.838172	1.05203	1.03188	0.926855	0.811265
IRAK2	interleukin-1 receptor-associated kinase 2		0.940956	1.1824	0.843894	0.902223	1.08872	0.996424	0.713057	0.901223
ACVR1B	activin A receptor, type 1B		1.28205	1.21054	0.936306	0.955668	1.21251	1.0194	0.919641	0.970343
C8B	complement component 8, beta polypeptide		1.00286	1.13803	0.708149	0.821446	1.02864	0.985914	0.952522	0.855306
TTC7	tetratricopeptide repeat domain 7		1.13813	1.05803	0.829117	0.805956	1.22527	1.00259	1.05817	0.862108
CD226	CD226 antigen		1.30424	1.06379	0.956387	0.928284	1.0399	1.21745	0.98932	0.850819
ITGAL	integrin alpha L		1.09903	1.06015	0.80331	1.13132	1.17443	1.4593	0.792402	1.1434
STAT5A	signal transducer and activator of transcription 5A		0.985475	1.11835	0.892103	0.818515	0.971713	1.05909	0.871242	0.757428
SERPINA3C	serine (or cysteine) peptidase inhibitor, clade A, member 3C		0.768972	1.12252	0.698336	0.724155	1.02603	0.950299	1.02009	0.683023
H2-EB1	histocompatibility 2, class II antigen E beta		1.01934	1.22769	0.731721	1.20481	1.18621	1.61034	1.01074	1.13019
MCL1	myeloid cell leukemia sequence 1		1.06344	0.968559	0.947467	0.907478	1.12631	1.12236	0.718281	0.894309
H2-AA	histocompatibility 2, class II antigen A, alpha		0.998281	1.3889	0.776892	1.48647	1.56115	1.91568	1.12705	1.36246
IFIT2	interferon-induced protein with tetratricopeptide repeats 2		0.960718	0.998337	0.794206	0.814268	0.914312	0.939804	0.673906	0.818972
NCF1	neutrophil cytosolic factor 1		1.09207	1.17471	0.885688	0.955434	1.28764	1.0979	0.946049	0.999063
C8A	complement component 8, alpha polypeptide		1.03553	1.04016	0.808324	0.800931	1.10422	1.07743	0.979571	0.881325
ALAS2	aminolevulinic acid synthase 2, erythroid		0.974748	0.996583	0.678532	0.685957	0.8529	1.05746	0.846116	0.955846
TNFSF13	tumor necrosis factor (ligand) superfamily, member 13		1.06462	1.21691	1.15092	0.83215	0.934297	1.21597	0.898686	0.735331
BTK	Bruton agammaglobulinemia tyrosine kinase		0.984488	0.962298	0.786348	0.962558	1.20369	1.01276	0.806383	0.846179
IL2RB	interleukin 2 receptor, beta chain		1.20148	1.34658	0.976182	1.30372	1.44556	1.22292	0.935064	1.05037
CD2	CD2 antigen		1.3484	1.16517	0.934479	0.992949	1.12148	1.1545	1.09804	0.902496
HIST2H2AB	histone cluster 2, H2ab		1.37544	1.71174	1.59368	1.10388	1.44488	1.69588	1.49123	0.920064
SMAD3	MAD homolog 3 (Drosophila)		1.07738	1.22559	0.885621	0.943907	1.24632	1.02468	0.880635	1.04319
LYN	Yamaguchi sarcoma viral (v-yes-1) oncogene homolog		1.19862	1.13722	0.863139	1.03977	1.24666	1.06697	0.908335	1.00627
IL15RA	interleukin 15 receptor, alpha chain		1.06713	0.982512	0.918792	0.809557	1.00388	1.01873	0.80051	0.821994
MET	met proto-oncogene		0.957094	0.941062	0.977731	0.713041	1.03589	0.998539	0.830735	0.714541
FCER2A	Fc receptor, IgE, low affinity II, alpha polypeptide		0.987822	0.877353	0.832856	0.957975	1.22397	1.26645	1.00158	0.794616
PTPRC	protein tyrosine phosphatase, receptor type, C		0.895706	1.13385	0.863724	1.03338	1.17026	1.37302	0.725159	1.14547
COLEC12	collectin sub-family member 12		0.962726	1.03582	0.876163	0.739796	1.02138	1.05532	0.937542	0.805217
ALOX5AP	arachidonate 5-lipoxygenase activating protein		1.00264	1.19738	0.769122	1.09338	1.23708	1.13676	0.812916	1.09519
ELF1	E74-like factor 1		1.1187	1.07635	0.986684	0.903438	1.19442	1.02751	0.841355	0.916372
FLT3	FMS-like tyrosine kinase 3		1.04531	1.35206	1.07486	1.14938	1.25791	1.41916	0.961914	1.00577
MYST1	MYST histone acetyltransferase 1		0.903374	1.00488	0.825077	0.719369	0.90035	0.770992	0.632942	0.78346
IKZF1	IKAROS family zinc finger 1		1.17644	1.27359	0.906624	1.14788	1.15679	1.34495	1.01986	1.02703
SP100	nuclear antigen Sp100		0.958328	0.958252	0.71072	0.908636	0.983814	1.01264	0.73677	0.890991
RAB4A	RAB4A, member RAS oncogene family		0.936021	0.814623	0.756052	0.635583	0.904829	0.897027	0.766442	0.792741
STAT5B	signal transducer and activator of transcription 5B		1.01782	0.993589	0.856491	0.815138	1.16243	0.955649	0.892448	0.868939
LRP5	low density lipoprotein receptor-related protein 5		0.975029	1.05841	0.812394	0.849755	0.980193	0.797723	0.724962	0.781453
PRKCQ	protein kinase C, theta		0.850467	0.975585	0.769043	0.893714	1.11766	1.01335	0.829262	0.798101
CD24A	CD24a antigen		1.08575	0.91356	1.09296	0.956686	1.89497	0.951638	1.04722	0.935276
SERPINA3G	serine (or cysteine) peptidase inhibitor, clade A, member 3G		1.04923	1.15567	0.865652	1.01364	1.22954	0.964644	0.661103	1.12128
MBL1	mannose-binding lectin (protein A) 1		0.754879	0.894643	0.73013	0.663868	0.91744	0.969492	0.791963	0.760058
CD274	CD274 antigen		1.04914	1.10864	0.756754	0.969904	1.06113	1.21323	1.01583	0.956215
FCGR4	Fc receptor, IgG, low affinity IV		1.03925	1.29699	0.984109	1.52339	1.71014	2.02521	1.05814	1.51696
ZC3HAV1	zinc finger CCCH type, antiviral 1		0.922828	0.980989	0.844721	0.839979	1.1733	1.1068	0.938762	0.885054
CREBBP	CREB binding protein		0.997408	1.01658	0.864336	0.904775	1.06316	0.994041	0.763172	0.882133
TMEM102	transmembrane protein 102		1.1442	1.0606	1.02318	0.964825	1.13395	1.07433	0.860326	0.856732
CXCL9	chemokine (C-X-C motif) ligand 9		0.962936	1.22707	0.784162	1.01786	0.828281	1.10188	0.800716	0.862191
NKAP	NFKB activating protein		1.0236	0.8716	0.909517	0.794441	1.01259	0.839077	0.738163	0.715357
NFKBIA	nuclear factor of kappa light polypeptide gene enhancer in B-cells inhibitor, alpha		1.00624	1.13118	0.967081	0.823233	0.835177	0.803192	0.598435	0.798326
TMEM173	transmembrane protein 173		1.2882	1.32266	0.957923	1.23067	1.51609	1.52822	1.26166	1.32619
HGF	hepatocyte growth factor		0.967768	0.973933	0.83003	0.888318	1.06732	1.14649	0.889166	0.903835
CD27	CD27 antigen		1.13516	1.07974	0.97901	0.95298	1.14878	1.23078	0.947248	1.00348
RC3H1	RING CCCH (C3H) domains 1		0.955174	1.00263	0.92209	0.850034	0.930964	0.913691	0.590599	0.856922
TGFBR1	transforming growth factor, beta receptor I		1.13568	0.965704	0.890757	0.926567	1.06058	1.02221	0.734109	0.993234
IFI204	interferon activated gene 204		0.74526	0.805297	0.600222	0.532521	0.814465	0.998015	0.836629	0.890014
APOBEC1	apolipoprotein B mRNA editing enzyme, catalytic polypeptide 1		0.874632	0.792958	0.560108	0.878906	0.883086	0.65125	0.595598	0.690287
SERPINA3F	serine (or cysteine) peptidase inhibitor, clade A, member 3F		0.990922	1.00547	0.750609	0.803068	1.02321	0.94725	0.845529	0.978929
SWAP70	SWA-70 protein		0.977751	1.04967	0.934933	0.797084	1.20701	0.927842	0.850816	0.963684
NHEJ1	nonhomologous end-joining factor 1		0.738455	0.941036	0.677057	0.766725	1.04781	0.803498	0.78909	0.780868
TAB2	TGF-beta activated kinase 1/MAP3K7 binding protein 2		0.883511	0.914926	0.832167	0.80714	0.947916	0.922092	0.680011	0.812786
RARA	retinoic acid receptor, alpha		1.04301	1.12551	0.900311	0.992788	1.08171	1.05018	0.917572	0.861576
C1RA	complement component 1, r subcomponent A		0.996529	1.11973	0.943506	0.780589	1.05704	1.05497	0.990347	0.897307
F7	coagulation factor VII		1.1766	1.09643	0.958905	0.827024	1.08542	0.905091	1.00309	0.852868
H2-AB1	histocompatibility 2, class II antigen A, beta 1		1.15907	1.52365	0.801794	1.61061	1.25801	1.78009	1.18887	1.28895
CFB	complement factor B		1.00618	1.07586	0.89796	0.856982	1.03593	1.0119	0.921076	0.857588
TRIM21	tripartite motif-containing 21		1.03239	1.13276	0.828142	0.986573	1.09645	0.909084	0.99224	0.761621
DAF2	decay accelerating factor 2		1.03802	0.954903	0.843717	0.801773	0.948917	0.976536	0.876458	0.832823
SERPINB9	serine (or cysteine) peptidase inhibitor, clade B, member 9		1.0665	1.55411	1.27746	0.961323	1.34608	1.50474	1.24413	1.20286
ALDH1A2	aldehyde dehydrogenase family 1, subfamily A2		1.08913	1.04919	0.998485	0.915907	1.08909	1.20868	0.948159	0.936625
ATF1	activating transcription factor 1		1.02218	1.06123	0.798473	0.871365	0.995945	0.852304	0.834854	0.864471
THY1	thymus cell antigen 1, theta		0.943921	0.748693	0.826477	0.742051	0.911465	1.07123	0.861606	0.719537
MYST3	MYST histone acetyltransferase (monocytic leukemia) 3		1.06229	1.06093	0.927973	0.922387	1.12079	0.988887	0.784966	0.993949
H2AFY2	H2A histone family, member Y2		0.785445	0.864346	0.743417	0.763193	0.686913	1.05669	0.810483	0.593185
NUP85	nucleoporin 85		1.10759	1.17812	0.918556	0.960315	0.964122	0.999832	0.905487	0.867328
SYKB	spleen tyrosine kinase		1.03704	1.01732	0.823148	1.18451	1.21326	1.21488	0.917533	0.929907
FPR3	formyl peptide receptor 3		1.46893	1.55348	1.24933	1.51069	1.49504	1.43404	1.26818	1.09283
BLOC1S3	biogenesis of lysosome-related organelles complex-1, subunit 3		1.03258	1.10449	0.936678	1.04204	0.950973	0.970573	0.727436	0.788188
CFD	complement factor D (adipsin)		0.91341	1.01338	0.816948	0.894118	0.964215	1.30974	1.10114	0.810091
ROGDI	rogdi homolog (Drosophila)		1.07014	1.17976	0.940511	0.978709	1.01672	0.788989	0.820198	0.758193
ANGPT1	angiopoietin 1		0.85843	1.03834	0.692543	0.705616	0.985782	0.929404	0.95493	0.937511
PRKCD	protein kinase C, delta		1.14668	1.07683	1.02935	1.29134	1.37209	1.21757	0.82382	1.01066
TLR8	toll-like receptor 8		1.31592	1.40946	0.918146	1.49061	1.40608	1.41727	1.05104	1.33041
HHEX	hematopoietically expressed homeobox		1.32694	0.850297	0.946251	0.991347	1.64391	1.06221	1.1916	1.08742
EIF2AK2	eukaryotic translation initiation factor 2-alpha kinase 2		0.921066	0.959248	0.762804	0.648776	0.752515	0.802352	0.708043	0.848261
HIST1H4D	histone cluster 1, H4d		0.990341	0.996869	0.891586	0.919103	1.23193	1.05026	0.95859	0.921058
H2-DMB2	histocompatibility 2, class II, locus Mb2		1.36852	1.10877	0.897585	1.41454	1.16102	1.46526	1.05247	1.05035
HIST3H2A	histone cluster 3, H2a		1.09966	1.09087	0.923699	0.956375	1.00243	1.00531	0.817095	0.938399
CD4	CD4 antigen		1.1044	1.08183	0.960853	0.877759	1.11848	0.984353	1.00126	0.879073
EPAS1	endothelial PAS domain protein 1		0.996813	0.977388	0.917839	0.820338	1.02872	0.909694	0.933736	0.720903
PRKD2	protein kinase D2		1.45431	1.36692	1.02415	1.17979	1.27591	1.09179	1.24117	1.05516
UNC119	unc-119 homolog (C. elegans)		0.76417	0.925508	0.666354	0.890268	0.894774	0.862728	0.629354	0.804063
TCF21	transcription factor 21		1.31699	1.28296	0.991461	1.22469	1.08723	1.20882	1.04267	0.990181
RBM15	RNA binding motif protein 15		1.37858	1.12504	1.05242	0.982439	0.945376	0.836301	0.726566	0.957799
C1RL	complement component 1, r subcomponent-like		0.997837	0.939965	0.81292	0.809301	1.13652	1.06993	1.00849	0.966333
WNT3A	wingless-related MMTV integration site 3A		1.355	1.08876	0.930772	1.10925	1.09294	1.18585	1.21937	0.84034
LYST	lysosomal trafficking regulator		1.15126	1.21865	0.989996	1.01837	1.25875	1.12269	1.0817	1.03504
MINK1	misshapen-like kinase 1 (zebrafish)		1.03797	0.937228	0.82055	0.859815	1.08391	0.928732	0.899937	0.883652
SP3	trans-acting transcription factor 3		0.876887	1.00926	0.930645	0.80595	0.981149	1.01529	0.771802	0.86752
CFH	complement component factor h		0.919725	0.931587	0.801173	0.816836	0.98711	1.06041	0.974061	0.801409
WAS	Wiskott-Aldrich syndrome homolog (human)		1.06166	0.981467	0.839689	1.1651	1.1817	1.168	0.825333	0.993727
ZBTB16	zinc finger and BTB domain containing 16		0.658499	0.843103	0.78454	0.563605	0.648015	0.403172	0.407404	0.468852
PGLYRP1	peptidoglycan recognition protein 1		1.08747	0.987148	1.02004	1.04097	1.50751	1.2052	1.05882	1.05295
DUOX2	dual oxidase 2		1.12952	0.985312	1.19576	1.12591	1.85992	1.2473	1.13982	1.09905
ABCB9	ATP-binding cassette, sub-family B (MDR/TAP), member 9		1.20183	1.17909	0.941764	1.20607	1.4485	1.3638	1.13693	1.25102
ATF2	activating transcription factor 2		0.925243	1.06713	0.907297	0.912458	1.07661	1.03317	0.86822	0.895158
THOC5	THO complex 5		1.05273	1.11524	0.920245	0.911113	1.06436	0.993023	0.901653	0.961897
GSK3B	glycogen synthase kinase 3 beta		0.928464	1.06445	0.919985	0.898901	1.05107	0.963043	0.8239	0.862504
VNN1	vanin 1		0.58412	0.788081	0.74939	0.659956	0.756849	0.804523	0.637074	0.520851
C4B	complement component 4B (Childo blood group)		0.972493	0.98729	0.90522	0.845674	1.00071	1.07415	0.995142	0.788667
POLR3B	polymerase (RNA) III (DNA directed) polypeptide B		1.03578	1.00489	0.968933	0.854228	0.965521	1.00566	0.785182	0.910679
RPS6KA5	ribosomal protein S6 kinase, polypeptide 5		1.02855	0.908114	0.730638	0.89336	0.949944	0.86126	0.860363	0.806137
HSP90AA1	heat shock protein 90, alpha (cytosolic), class A member 1		0.807841	1.67104	1.01626	1.16984	1.03507	1.34576	0.841928	1.24251
NOS2	nitric oxide synthase 2, inducible		1.10911	1.33146	1.19064	1.15528	1.56251	1.38515	1.43465	0.957821
REG1	regenerating islet-derived 1		1.02822	1.09353	0.837116	1.0738	1.24927	0.976201	1.01716	0.897801
TGFBR3	transforming growth factor, beta receptor III		1.29839	1.17774	0.992624	1.09877	1.29828	1.1106	1.14916	1.06092
STAT1	signal transducer and activator of transcription 1		0.947336	1.09654	0.785947	0.944099	0.979001	0.990576	0.934022	0.871567
FCGR3	Fc receptor, IgG, low affinity III		1.08415	1.1654	1.0072	1.3189	1.46771	1.81448	1.21565	1.3336
MOG	myelin oligodendrocyte glycoprotein		1.10223	1.04279	1.15328	0.935968	1.12015	1.37625	1.04153	0.960975
STAT6	signal transducer and activator of transcription 6		1.15395	1.04309	0.94464	0.973514	1.23645	1.05739	1.00478	1.03954
HC	hemolytic complement		1.01931	0.990455	0.860865	0.916526	1.10077	1.07105	0.929034	0.987118
IL31RA	interleukin 31 receptor A		1.0093	0.989457	0.842773	0.910935	1.00026	1.0781	0.981628	0.866807
JAK2	Janus kinase 2		0.981551	0.957792	0.893339	0.887713	1.01856	0.953507	0.821746	0.853563
H2-T23	histocompatibility 2, T region locus 23		0.971432	1.04166	0.839835	0.777678	0.898448	0.847723	0.967039	0.73829
MEF2A	myocyte enhancer factor 2A		0.974271	0.936519	0.845598	0.890142	0.999091	0.894595	0.781044	0.849413
IL6RA	interleukin 6 receptor, alpha		0.889261	0.987585	1.0043	0.764285	0.893419	0.835444	0.657366	0.765933
RPS6KA2	ribosomal protein S6 kinase, polypeptide 2		0.956162	1.07015	0.80118	0.918249	1.04245	0.841396	0.752217	0.991349
HIST1H2BB	histone cluster 1, H2bb		0.781816	1.07012	0.868514	0.677056	0.926199	1.02405	0.877866	0.944255
PLSCR1	phospholipid scramblase 1		1.28706	1.08083	1.03788	1.07604	1.1599	1.02547	1.0736	0.847291
IL7R	interleukin 7 receptor		0.987015	1.08497	0.822122	0.957671	1.05826	0.800163	0.742538	0.96102
HIST3H2BA	histone cluster 3, H2ba		0.952512	0.800098	0.95511	0.786569	1.03527	1.28443	1.01572	0.86152
MAP3K1	mitogen-activated protein kinase kinase kinase 1		1.10401	1.18845	0.933453	1.02144	1.20199	0.913367	0.991521	0.970748
TLR4	toll-like receptor 4		1.08018	1.33708	0.979652	0.917757	1.50591	0.958905	1.08698	1.35591
NCOR1	nuclear receptor co-repressor 1		0.968339	0.973923	0.934568	0.824649	0.995824	1.01224	0.901937	0.852443
WNT5A	wingless-related MMTV integration site 5A		1.265	1.14898	1.03457	0.979383	0.910725	0.950193	0.937986	0.853504
KLHL6	kelch-like 6 (Drosophila)		1.37944	1.07903	1.0194	1.03931	1.15946	1.13079	1.08204	1.08766
CSF2RB	colony stimulating factor 2 receptor, beta, low-affinity (granulocyte-macrophage)		0.87909	1.05892	0.819561	1.07113	1.19608	1.1226	0.671956	1.22814
IL4	interleukin 4		0.927094	0.987098	0.752488	0.822199	0.929917	0.881676	0.922363	0.823153
BAD	BCL2-associated agonist of cell death		1.09231	0.936646	0.753665	0.940457	0.860304	0.977389	0.825297	0.928301
TACC3	transforming, acidic coiled-coil containing protein 3		0.94402	0.791209	0.924614	0.807335	0.9873	0.768476	0.769761	0.611533
SELE	selectin, endothelial cell		0.990034	0.910709	1.01715	0.872865	1.0207	1.02971	0.960014	0.6745
KLRK1	killer cell lectin-like receptor subfamily K, member 1		1.13372	1.26437	1.12588	1.0263	1.17118	1.09048	0.905259	1.10005
KLRE1	killer cell lectin-like receptor family E member 1		0.960854	0.853254	0.794247	0.833539	0.91518	1.03619	0.807282	0.924965
TRAF2	TNF receptor-associated factor 2		1.18894	1.18138	0.913605	1.15222	1.14188	1.22379	0.973778	1.18855
FPR1	formyl peptide receptor 1		1.03669	1.09255	0.825905	1.16243	1.3749	1.05093	0.878508	1.19995
G6PDX	glucose-6-phosphate dehydrogenase X-linked		1.34265	1.25312	1.07923	1.14353	1.21698	1.14203	1.19169	1.0116
PRAM1	PML-RAR alpha-regulated adaptor molecule 1		1.20321	1.01331	1.06216	1.10389	1.22895	1.17366	0.964199	0.996226
BCL11B	B-cell leukemia/lymphoma 11B		1.19585	0.901297	1.05599	0.947068	1.16085	1.3227	1.25731	0.835965
CEBPA	CCAAT/enhancer binding protein (C/EBP), alpha		1.2295	1.03491	0.943998	1.03123	1.07426	0.97586	1.02182	0.864484
CD83	CD83 antigen		1.29096	1.21152	0.947098	1.07584	1.20962	1.24198	1.16188	1.24975
HOXB7	homeobox B7		0.820755	1.11655	0.897055	0.877422	1.04231	1.11749	1.1084	0.786004
PIK3CA	phosphatidylinositol 3-kinase, catalytic, alpha polypeptide		1.02146	1.00519	0.916857	0.89346	0.955747	0.916569	0.748493	0.933856
ZC3H8	zinc finger CCCH type containing 8		1.06211	0.974236	0.944978	0.774394	0.977491	0.928442	0.798124	1.01545
SRC	Rous sarcoma oncogene		1.32515	1.1257	0.921324	1.2629	1.18258	1.24862	1.31053	0.882515
SGPL1	sphingosine phosphate lyase 1		1.01368	1.0618	0.941551	0.971961	1.10986	1.10992	0.952002	0.988425
PLD2	phospholipase D2		1.05523	1.00443	0.924975	0.911937	1.18698	1.00879	0.981682	1.00054
TARBP2	TAR (HIV) RNA binding protein 2		0.935922	0.857215	0.7587	0.971684	0.957797	0.762815	0.615456	0.81162
FOXP1	forkhead box P1		0.978097	1.06616	0.854496	0.985314	1.0394	0.933924	0.845176	0.925575
IRF7	interferon regulatory factor 7		0.971967	0.882264	0.887085	0.728184	1.03908	0.820098	0.83979	0.882472
IL12RB1	interleukin 12 receptor, beta 1		1.09665	1.2033	1.13214	1.07028	1.19194	1.41777	1.26019	0.950107
HCK	hemopoietic cell kinase		1.31805	1.28802	1.03644	1.29884	1.46445	1.5216	1.29334	1.39789
NKX3-2	NK3 homeobox 2		1.10588	0.95282	0.960162	0.873092	0.968443	1.14533	1.08777	0.830418
PIK3R2	phosphatidylinositol 3-kinase, regulatory subunit, polypeptide 2 (p85 beta)		0.965535	0.88085	0.905725	0.780403	0.917723	0.834589	0.791709	0.758124
C2	complement component 2 (within H-2S)		1.06661	1.12593	0.841864	0.947309	1.01068	0.949538	1.01563	0.930678
HDAC9	histone deacetylase 9		1.02037	1.29604	1.03589	0.943331	1.12697	1.30941	1.18597	1.11159
MS4A2	membrane-spanning 4-domains, subfamily A, member 2		0.998635	1.07318	0.892744	0.80995	1.03798	1.0085	1.0335	0.970801
MUC4	mucin 4		1.1456	0.97089	1.11847	0.998422	1.29547	1.01218	0.937617	0.932648
TCF7	transcription factor 7, T-cell specific		0.888063	0.890061	0.808863	0.84053	0.91042	0.84103	0.787884	0.744598
TBX21	T-box 21		0.940124	0.845381	0.861884	1.0365	0.944393	1.22165	0.828094	0.836189
LRRC17	leucine rich repeat containing 17		0.806542	0.944511	0.863147	0.719701	0.980754	0.939923	0.898602	0.82966
HIST1H2AB	histone cluster 1, H2ab		1.11706	0.802917	0.8175	0.906779	1.20518	0.999429	0.893264	1.10231
CLEC2D	C-type lectin domain family 2, member d		0.943205	0.963246	0.891346	0.831262	0.953402	0.905252	0.989912	0.683721
SOX6	SRY-box containing gene 6		0.945023	0.943534	0.952358	0.834723	1.01368	0.891654	0.781727	0.855002
DAB2IP	disabled homolog 2 (Drosophila) interacting protein		1.09665	1.07203	1.04591	1.1066	1.21359	1.17615	1.02899	0.933263
TIRAP	toll-interleukin 1 receptor (TIR) domain-containing adaptor protein		1.03776	1.04584	0.922151	1.09784	1.14138	1.07842	0.92821	0.936462
KDR	kinase insert domain protein receptor		1.10829	1.27558	0.98081	1.08506	1.20819	1.23101	1.0458	1.24253
CXCR2	chemokine (C-X-C motif) receptor 2		1.05529	0.911857	0.980353	0.95721	1.07294	1.08645	0.883561	0.905277
PIK3CB	phosphatidylinositol 3-kinase, catalytic, beta polypeptide		1.10142	1.07302	0.981308	0.949629	1.13585	1.09818	1.10825	0.943072
ALOX5	arachidonate 5-lipoxygenase		0.907515	0.86204	0.918575	0.966991	1.02483	1.14458	0.937085	0.735785
SAMHD1	SAM domain and HD domain, 1		0.996588	1.11346	0.863438	1.05665	1.1426	1.15991	1.01105	1.05541
TLR2	toll-like receptor 2		1.354	1.14831	0.998616	1.33312	1.31651	1.45227	1.08999	1.34352
MAP2K3	mitogen-activated protein kinase kinase 3		1.27241	1.05316	0.966457	1.00407	1.28598	1.15171	1.20182	1.13598
HIST1H2AE	histone cluster 1, H2ae		0.965799	0.965127	0.88514	0.850473	1.24907	0.921118	0.985287	0.989441
RUNX1	runt related transcription factor 1		1.22046	0.936933	0.869666	1.13307	1.15461	1.10106	0.947161	1.0449
LCK	lymphocyte protein tyrosine kinase		1.05263	1.1169	0.993912	1.05917	1.13809	1.21921	1.02951	1.01711
ACTN1	actinin, alpha 1		1.14066	0.944296	0.833652	1.00907	1.32756	1.06452	1.14469	1.06724
CD1D2	CD1d2 antigen		0.8291	0.85414	0.82132	0.687105	0.632728	1.11568	0.84321	0.756354
RPS27A	ribosomal protein S27A		0.651196	0.366126	0.600956	0.434911	0.917873	0.515665	0.524142	0.659955
NFAM1	Nfat activating molecule with ITAM motif 1		1.20718	1.2516	0.968029	1.39297	1.467	1.56448	1.23888	1.3763
MILL2	MHC I like leukocyte 2		0.9835	0.98138	0.988288	0.987864	0.982972	0.97695	0.855739	0.728448
ITK	IL2-inducible T-cell kinase		1.14573	0.974401	0.844804	1.0962	1.18084	1.01989	0.958053	1.02162
FNTA	farnesyltransferase, CAAX box, alpha		0.956353	0.965334	0.842408	0.83272	0.925925	0.69584	0.656834	0.883835
CDKN1B	cyclin-dependent kinase inhibitor 1B		1.03494	1.01483	0.9414	0.858737	0.91878	0.939513	0.839714	0.908006
MYO1E	myosin IE		1.03362	1.13342	1.01302	0.901574	1.01705	0.884185	0.86979	0.909162
CXCL12	chemokine (C-X-C motif) ligand 12		0.866033	1.07004	0.941662	0.884878	1.07816	1.14413	0.968439	0.983624
NLRC5	NLR family, CARD domain containing 5		1.03205	1.09105	1.00019	0.945545	1.05407	1.05979	1.04359	0.863094
ELMOD2	ELMO domain containing 2		1.00912	1.06488	0.88007	0.898509	0.897993	0.963415	0.927642	0.872981
CARD9	caspase recruitment domain family, member 9		0.741456	0.911697	0.881358	0.768017	0.82474	1.01336	0.877968	0.648125
A2M	alpha-2-macroglobulin		0.895793	1.22755	1.02727	0.975978	1.06016	1.22479	1.17743	0.829058
SNRPD3	small nuclear ribonucleoprotein D3		1.02714	1.09936	0.89211	0.933189	0.898817	0.852552	0.843451	0.858558
SOCS1	suppressor of cytokine signaling 1		1.10761	0.951221	0.971213	1.08352	1.00676	1.1495	1.03786	0.742691
IL7	interleukin 7		0.987869	1.06506	1.07587	0.993746	1.31481	1.02086	0.991659	0.932416
BCL3	B-cell leukemia/lymphoma 3		1.4006	1.43018	1.14696	1.34934	1.40081	1.40062	1.3686	1.26096
LAX1	lymphocyte transmembrane adaptor 1		1.11117	1.18992	1.06214	1.13068	1.14345	1.22954	1.09272	0.969473
VSIG4	V-set and immunoglobulin domain containing 4		1.00699	1.00359	0.770645	1.54393	1.72785	1.93528	1.24097	1.61041
CSF1R	colony stimulating factor 1 receptor		1.0983	1.23592	0.800486	1.4409	1.55384	1.50082	1.11533	1.55409
IL21R	interleukin 21 receptor		1.205	1.2017	0.915485	1.03945	1.03963	1.2526	1.35215	0.976295
HIST2H2BB	histone cluster 2, H2bb		0.799101	0.775457	0.689287	0.846205	0.972243	0.638866	0.743829	0.624918
C1QA	complement component 1, q subcomponent, alpha polypeptide		0.985519	1.08048	0.898891	1.22219	1.29047	1.30985	1.00657	1.12674
CCR1	chemokine (C-C motif) receptor 1		0.820026	0.903827	0.831814	0.667631	0.914475	0.81059	0.721678	0.923402
TNF	tumor necrosis factor		1.00263	0.830323	0.945429	1.00806	1.0856	1.39067	1.14873	0.827993
RBP1	retinol binding protein 1, cellular		0.895766	1.32357	0.754425	1.09141	0.672966	0.861643	0.636155	0.941899
SERPINA3M	serine (or cysteine) peptidase inhibitor, clade A, member 3M		0.937122	0.884836	1.00993	0.752908	1.05604	1.13674	1.05356	0.845897
CD59A	CD59a antigen		0.973693	0.991042	0.976111	0.962174	1.22188	1.31112	1.11802	1.0469
MLL1	myeloid/lymphoid or mixed-lineage leukemia 1		1.05834	1.09632	1.00824	1.02117	1.07156	0.9825	0.85661	0.953938
SERPINA3N	serine (or cysteine) peptidase inhibitor, clade A, member 3N		0.975228	0.940077	0.960505	0.857252	0.968694	1.04781	0.953369	0.816364
ZEB1	zinc finger E-box binding homeobox 1		1.13641	1.13589	1.10517	0.984979	1.25692	1.17568	1.09656	1.10827
AP3D1	adaptor-related protein complex 3, delta 1 subunit		0.963848	1.04854	0.896653	0.95786	1.10046	1.00582	0.8965	1.00962
C5AR1	complement component 5a receptor 1		1.02802	1.02472	0.927735	0.86792	1.02779	1.31286	0.956263	1.25965
PRKCI	protein kinase C, iota		1.04502	1.02265	0.939949	0.928519	0.951939	0.869598	0.799859	0.883089
SLIT3	slit homolog 3 (Drosophila)		1.16337	1.14968	1.05886	1.09279	1.30697	1.1554	1.31516	0.893959
IL1A	interleukin 1 alpha		1.03559	1.11019	0.835586	1.08266	1.21499	0.989818	0.862615	1.19383
HIST1H4H	histone cluster 1, H4h		0.860376	1.14768	0.814398	0.816885	0.892181	0.885059	0.888461	0.938578
BMI1	Bmi1 polycomb ring finger oncogene		0.973134	1.00355	0.758273	0.852138	0.816121	1.02423	0.799952	1.07784
P2RX7	purinergic receptor P2X, ligand-gated ion channel, 7		1.07074	1.12265	0.939003	1.05593	1.03536	1.0054	0.884057	0.99093
FZD5	frizzled homolog 5 (Drosophila)		1.20292	1.09561	1.09316	1.00468	1.04335	1.15419	0.937905	1.07377
EDN2	endothelin 2		1.06615	1.00578	0.915694	0.975283	1.01464	1.02385	1.07423	0.793085
ARRB2	arrestin, beta 2		0.963701	1.07703	0.852554	1.04869	1.14707	0.971698	0.860348	1.04206
MITF	microphthalmia-associated transcription factor		0.96658	0.978435	0.963174	0.875121	1.01023	1.02882	0.819694	0.987403
SIT1	suppression inducing transmembrane adaptor 1		1.03372	0.901928	0.976036	1.02472	1.11683	1.07863	0.888099	0.892437
IRAK3	interleukin-1 receptor-associated kinase 3		1.01749	1.07491	1.04605	1.49285	1.3761	1.45949	0.964485	1.01002
TGFBR2	transforming growth factor, beta receptor II		1.19081	1.03166	0.934953	0.98919	1.11146	1.00157	0.990586	1.05657
XRCC5	X-ray repair complementing defective repair in Chinese hamster cells 5		1.1269	1.15437	1.0173	0.974715	0.976808	0.963752	0.908167	0.967068
HMGB3	high mobility group box 3		1.0259	0.89183	0.852159	0.953522	1.02688	1.08102	1.09843	0.786845
SCIN	scinderin		1.30347	1.10093	1.01152	0.960242	0.922009	0.999629	1.01472	0.981363
THRA	thyroid hormone receptor alpha		1.05564	1.00236	0.870473	0.956571	1.18621	1.01597	1.12964	0.951724
THPO	thrombopoietin		1.11607	0.97517	0.92979	0.903426	1.12948	0.997822	1.03446	1.00324
PRF1	perforin 1 (pore forming protein)		0.983654	0.964829	0.889672	0.962658	0.817238	1.15519	0.920875	0.826574
ZP3	zona pellucida glycoprotein 3		0.938138	1.06137	1.0347	0.932035	1.14619	1.02384	0.979894	0.881497
CASP8	caspase 8		0.965079	1.14829	0.992136	1.01827	1.05817	1.06188	1.05642	0.821574
TRIM56	tripartite motif-containing 56		1.06356	0.969348	0.994629	0.989771	1.09768	0.935142	0.906271	0.844864
MEIS1	Meis homeobox 1		1.16028	1.3794	1.14881	1.08588	1.21321	1.04602	0.959178	1.21775
INS2	insulin II		1.16494	1.1027	0.940057	1.11763	1.15978	1.23186	1.19568	1.03064
SERPING1	serine (or cysteine) peptidase inhibitor, clade G, member 1		0.883454	0.995493	0.915617	0.900341	1.10005	1.09838	1.04157	0.893043
LIFR	leukemia inhibitory factor receptor		1.0043	1.1001	0.905808	0.969219	0.98067	0.941537	0.901673	0.92725
CCR2	chemokine (C-C motif) receptor 2		0.928835	1.06708	0.934249	1.05523	1.04982	1.1215	0.802802	1.04247
RNF31	ring finger protein 31		1.17354	1.12351	0.980224	1.03275	1.10546	0.993085	0.953972	1.08441
FZD7	frizzled homolog 7 (Drosophila)		0.838895	1.07514	0.791554	0.983083	1.01333	0.877212	0.888686	0.843627
GHR	growth hormone receptor		0.943833	0.996538	0.921022	0.896085	1.04838	1.16925	1.08991	0.930691
NLRC3	NLR family, CARD domain containing 3		0.983716	1.03224	0.950389	0.873391	1.04505	0.870867	1.01477	0.792642
ITGAM	integrin alpha M		0.908197	1.00587	0.859621	1.2238	1.34435	1.02394	0.852728	1.01914
DCLRE1C	DNA cross-link repair 1C, PSO2 homolog (S. cerevisiae)		1.15023	1.2077	1.08883	0.990958	1.01536	1.03698	1.00354	0.991766
WWP1	WW domain containing E3 ubiquitin protein ligase 1		1.03291	1.03973	1.00851	0.894291	1.01206	1.10051	1.02205	0.943687
TLR7	toll-like receptor 7		0.753758	0.956713	0.951278	1.09366	1.10473	1.24801	0.726689	0.984566
CORO1A	coronin, actin binding protein 1A		1.02114	0.934115	0.837737	1.00861	0.979519	0.994072	0.948879	0.838127
H2AFJ	H2A histone family, member J		1.09596	1.02243	0.932665	0.803929	0.786436	0.869006	0.825164	0.928963
RPL22	ribosomal protein L22		1.33093	1.14813	1.14628	1.03535	1.16086	1.02191	0.98192	1.14886
COMMD7	COMM domain containing 7		1.1503	1.00809	0.88501	0.961751	1.02454	0.932257	0.9969	0.963259
JAK1	Janus kinase 1		0.980295	1.00398	0.925808	0.987606	1.05838	0.999591	0.870739	0.955712
PTPRF	protein tyrosine phosphatase, receptor type, F		1.10369	1.03664	0.931323	1.00982	1.20474	1.1264	1.10408	1.09219
JAM3	junction adhesion molecule 3		1.06366	1.16817	0.944279	1.16897	0.991867	1.15322	0.882685	1.05426
CALCR	calcitonin receptor		1.03629	1.27	1.15443	0.927549	1.22144	1.25949	1.22668	1.12194
APOA1	apolipoprotein A-I		0.952508	0.996908	0.889724	0.90565	0.968089	0.940353	0.918075	0.858626
TCF3	transcription factor 3		1.05858	0.980216	0.953274	0.902256	1.05796	0.967099	0.953717	0.954879
CD48	CD48 antigen		1.39004	1.45051	1.25066	1.65733	1.56372	1.58075	1.11684	1.52262
FAS	Fas (TNF receptor superfamily member 6)		0.963053	1.06921	1.07219	0.874683	0.81705	0.814794	0.763561	0.686147
SHC1	src homology 2 domain-containing transforming protein C1		0.987478	1.099	1.06039	0.938356	1.02845	1.10476	0.895614	1.02075
NLRP3	NLR family, pyrin domain containing 3		0.888586	0.910936	0.811772	0.902608	0.907134	0.911438	0.806966	0.83652
IL4RA	interleukin 4 receptor, alpha		1.0968	1.00733	0.88833	0.994168	1.04038	0.830925	0.927482	0.879864
PIK3R1	phosphatidylinositol 3-kinase, regulatory subunit, polypeptide 1 (p85 alpha)		1.1044	1.06432	0.992502	0.923383	1.01605	1.14824	1.13288	0.973493
GAB1	growth factor receptor bound protein 2-associated protein 1		1.07157	0.803698	0.891877	0.981513	1.1667	0.903703	0.899939	0.890022
TRP53	transformation related protein 53		1.22272	1.27846	1.01478	1.25273	1.2213	1.04438	1.03312	1.12659
ITGB2L	integrin beta 2-like		0.907218	0.899065	0.930848	0.826641	0.960638	1.20301	1.06396	0.867299
MEF2C	myocyte enhancer factor 2C		1.08144	1.18339	0.967121	1.14699	1.23475	1.05949	0.999901	1.12282
TOB2	transducer of ERBB2, 2		1.09677	1.25797	1.18511	1.19624	1.08022	1.11956	0.805414	1.04853
JUNB	Jun-B oncogene		0.742812	0.729146	0.76992	0.834962	0.940432	1.07287	0.792846	0.84487
FOXO3	forkhead box O3		0.828233	0.838751	0.799469	0.768926	0.861203	0.7164	0.644132	0.80659
RIPK1	receptor (TNFRSF)-interacting serine-threonine kinase 1		0.954971	0.796819	0.858628	0.877104	0.883931	0.793621	0.690314	0.766024
DDX58	DEAD (Asp-Glu-Ala-Asp) box polypeptide 58		0.999874	0.977762	0.772606	1.0412	1.15248	0.997304	1.06236	0.966918
IL6ST	interleukin 6 signal transducer		0.995587	0.989579	0.886204	0.980254	1.05643	1.00514	0.938634	0.963028
CD55	CD55 antigen		0.970938	1.18321	0.986952	0.964121	1.15125	1.2825	1.12152	1.19945
DTX1	deltex 1 homolog (Drosophila)		0.937762	0.912951	0.808905	0.964968	0.889924	1.04017	0.889741	0.85731
GRB2	growth factor receptor bound protein 2		1.05084	1.05953	0.945493	0.956873	1.09119	0.846627	0.933295	0.935406
PLEKHA1	pleckstrin homology domain containing, family A (phosphoinositide binding specific) member 1		1.18802	1.22805	0.957772	1.15298	1.08984	1.1005	0.807444	1.37477
SOX4	SRY-box containing gene 4		1.23297	0.996685	0.923245	0.972782	1.08626	1.05211	1.13635	1.03884
CD79B	CD79B antigen		1.10066	0.963722	0.877406	1.27886	1.19923	1.15294	1.00486	0.956776
PLA2G4A	phospholipase A2, group IVA (cytosolic, calcium-dependent)		1.02338	0.899918	0.744863	0.93815	1.09544	1.00898	0.991114	1.08188
GM6132	predicted pseudogene 6132		0.97318	0.806688	0.909395	0.793911	0.996792	0.939319	0.89203	0.871805
1700014N06RIK	RIKEN cDNA 1700014N06 gene		0.985294	1.02698	0.997328	0.876239	1.07807	1.11004	1.07318	0.974602
HIST1H2BG	histone cluster 1, H2bg		0.866446	0.932385	0.835302	0.870418	0.880559	1.23752	0.884265	1.06773
MASP2	mannan-binding lectin serine peptidase 2		1.06601	1.06477	0.962493	0.965372	1.11155	1.04986	1.042	1.03844
ITGB2	integrin beta 2		0.975847	1.0555	0.909795	1.15016	1.15163	1.32262	0.992077	1.15694
MLL5	myeloid/lymphoid or mixed-lineage leukemia 5		1.05329	1.12971	1.04311	1.0275	1.08138	1.12329	0.979762	1.04847
AHCTF1	AT hook containing transcription factor 1		0.922536	1.1013	0.937387	0.906775	0.920736	0.929182	0.830198	0.944528
PIAS1	protein inhibitor of activated STAT 1		1.05598	1.12782	1.04535	1.01583	1.18194	1.15473	1.09554	1.06689
SOS1	son of sevenless homolog 1 (Drosophila)		0.931593	1.02491	0.971012	0.907226	0.970885	0.958673	0.877448	0.875301
HOXB3	homeobox B3		1.07277	0.985448	0.963687	0.986582	0.969548	1.05837	0.952043	0.916564
SLC25A38	solute carrier family 25, member 38		0.981393	1.04341	0.94824	1.03156	1.01031	1.0241	0.824288	0.990038
HIST2H4	histone cluster 2, H4		0.954677	0.919607	0.934832	0.822874	1.19772	1.06257	1.15204	0.954904
PLCG1	phospholipase C, gamma 1		1.10021	1.13286	0.999034	0.989376	1.06163	1.00731	1.01296	1.02138
CTRB1	chymotrypsinogen B1		0.993466	0.922589	1.10525	0.933324	1.09908	1.12215	1.10124	0.72927
BTLA	B and T lymphocyte associated		1.14163	1.22242	0.925636	1.25721	1.07526	1.05039	1.03555	0.983269
ADORA2B	adenosine A2b receptor		0.948351	0.864517	0.855926	0.898317	1.0413	0.956315	1.05965	0.753487
H2-M3	histocompatibility 2, M region locus 3		1.1227	1.17673	1.00445	1.40601	1.33132	1.61027	1.32004	1.17705
PRKCB	protein kinase C, beta		1.14243	1.15971	0.859512	1.2674	1.30057	1.18817	1.05745	1.30171
NOD1	nucleotide-binding oligomerization domain containing 1		0.993932	0.980255	0.952431	0.955008	1.08259	1.01948	0.939574	0.970327
BST2	bone marrow stromal cell antigen 2		1.06258	1.03794	0.998036	0.879618	1.04097	0.842615	0.883654	0.969931
IFNAR2	interferon (alpha and beta) receptor 2		0.930547	1.00553	1.017	0.839323	0.989931	0.995325	0.907776	0.90881
UBD	ubiquitin D		1.14371	0.964053	0.857658	1.04881	0.88059	1.05252	1.10833	0.771275
ADAM10	a disintegrin and metallopeptidase domain 10		0.958196	1.03754	0.967524	0.98535	1.05639	0.970074	0.842271	0.973984
SBDS	Shwachman-Bodian-Diamond syndrome homolog (human)		1.11032	0.908824	1.09215	0.897364	1.00626	0.965611	0.805679	0.945092
SP1	trans-acting transcription factor 1		0.969238	0.884979	0.937228	0.968131	1.0612	1.06607	0.822466	1.00495
CTNNB1	catenin (cadherin associated protein), beta 1		0.981442	0.977498	0.865467	0.899779	0.993695	0.948647	0.921859	0.971068
C8G	complement component 8, gamma polypeptide		1.02141	0.994773	0.919515	0.988193	1.08007	1.06858	1.01211	0.986505
SH2D1B1	SH2 domain protein 1B1		0.937204	1.03593	1.13923	1.09121	1.16131	1.23315	0.880977	0.987935
IFNG	interferon gamma		1.23738	1.01105	1.18286	0.943855	1.18475	0.968363	1.01301	0.991822
MERTK	c-mer proto-oncogene tyrosine kinase		0.904899	0.926079	0.865519	1.00809	1.08825	0.99842	0.797027	1.00732
AP3B1	adaptor-related protein complex 3, beta 1 subunit		0.877295	0.952824	0.925566	0.873462	0.958152	0.933056	0.856321	0.840716
ERBB2	v-erb-b2 erythroblastic leukemia viral oncogene homolog 2, neuro/glioblastoma derived oncogene homolog (avian)		1.21279	0.875507	0.886002	1.01146	1.15473	0.858803	1.13165	0.82669
CFI	complement component factor i		0.971515	0.915941	0.92459	0.922817	1.04983	1.0546	1.00373	0.901419
ANKRD54	ankyrin repeat domain 54		1.14157	1.04904	1.04415	0.924747	1.25221	1.09302	0.967389	1.32915
NBN	nibrin		0.924425	1.1155	0.953953	0.87081	0.87227	0.815476	0.792698	0.888322
CHD7	chromodomain helicase DNA binding protein 7		1.01793	1.00238	1.06633	0.850043	1.00727	0.951005	0.933861	0.891908
CRIP2	cysteine rich protein 2		0.827616	0.949808	0.930528	0.954708	1.08369	0.933354	0.877588	0.807657
FCGR1	Fc receptor, IgG, high affinity I		0.861897	1.00419	0.699817	0.91845	1.032	1.07582	1.05896	1.0623
PELI1	pellino 1		0.893792	0.916874	0.867855	0.775534	0.856525	0.837228	0.819784	0.834823
SNRPB	small nuclear ribonucleoprotein B		0.952982	1.07906	0.904479	0.968638	1.00841	0.934521	0.967208	0.900597
MYH9	myosin, heavy polypeptide 9, non-muscle		1.08166	1.0435	0.910314	1.01789	1.04478	0.930022	0.899007	1.03388
HDAC4	histone deacetylase 4		1.13223	0.982153	0.961588	0.978156	1.00302	0.952662	0.947692	0.946134
PYCARD	PYD and CARD domain containing		0.98331	0.851942	0.886085	1.03572	1.01755	1.27917	0.99	0.981187
PLCG2	phospholipase C, gamma 2		1.08123	0.874756	0.914521	1.02276	1.13507	1.07823	0.880909	1.11022
PRDM1	PR domain containing 1, with ZNF domain		0.979331	0.918952	0.801388	1.05742	0.891327	1.03631	0.921651	0.824639
HIST2H2BE	histone cluster 2, H2be		1.05996	1.0843	0.996011	0.898921	0.990201	0.951846	0.851283	1.10437
BCL2L1	BCL2-like 1		0.950798	1.08972	1.09419	0.871436	0.895331	0.720165	0.790082	0.690315
CAV1	caveolin 1, caveolae protein		1.048	1.04313	1.12078	0.954417	1.05432	1.24084	0.920908	1.13838
MAPKAPK3	mitogen-activated protein kinase-activated protein kinase 3		1.05139	0.681572	0.811802	0.815847	0.898183	0.943095	0.840561	0.901137
CD3D	CD3 antigen, delta polypeptide		0.68175	0.749399	0.687876	0.716964	0.840303	0.767734	0.78478	0.67545
BARX1	BarH-like homeobox 1		1.01118	0.911172	1.11921	0.94408	1.03695	1.37206	1.20097	0.821378
TWSG1	twisted gastrulation homolog 1 (Drosophila)		0.997806	0.919686	0.855879	0.878023	0.887787	0.85059	0.834351	0.883046
CX3CL1	chemokine (C-X3-C motif) ligand 1		1.09137	0.90507	1.07349	1.02123	1.07772	1.1139	0.963234	0.895978
VTCN1	V-set domain containing T cell activation inhibitor 1		0.92662	0.907013	0.96929	0.957871	1.40807	1.08193	1.16847	0.986752
NCK2	non-catalytic region of tyrosine kinase adaptor protein 2		0.912248	0.927387	0.730885	0.866305	1.05581	0.84347	0.921803	1.01133
1100001G20RIK	RIKEN cDNA 1100001G20 gene		1.02018	1.02172	1.23207	0.805258	0.971384	0.965595	0.870928	0.848856
FOXJ1	forkhead box J1		0.847595	1.04853	0.899105	0.869325	0.889347	0.971059	0.931189	0.847956
TNFRSF4	tumor necrosis factor receptor superfamily, member 4		1.23924	1.35747	1.12879	1.14979	1.07155	0.997044	1.01886	1.11033
SIX1	sine oculis-related homeobox 1 homolog (Drosophila)		1.09032	1.06608	0.966033	1.11386	1.07198	1.12198	1.08064	0.949759
STAT3	signal transducer and activator of transcription 3		0.949045	0.844879	0.977656	0.846243	0.924257	0.934375	0.753383	0.874363
CD1D1	CD1d1 antigen		0.888149	0.943655	0.91594	0.739269	0.866469	0.875697	0.91636	0.806401
RAG2	recombination activating gene 2		1.2993	1.14293	1.12992	0.860962	1.04283	0.956186	1.06016	1.14804
EFNB1	ephrin B1		1.21905	1.15194	1.06388	1.16028	1.0715	1.08314	0.983186	1.07162
POLM	polymerase (DNA directed), mu		1.08056	1.12741	0.990342	1.01699	1.10931	1.00019	1.07931	0.995662
FOXF1A	forkhead box F1a		0.960125	1.00764	1.02051	0.876347	1.07439	1.04772	1.1007	0.870183
POU2F2	POU domain, class 2, transcription factor 2		0.958438	1.11755	0.930472	1.17619	1.05181	1.1501	0.911632	1.02779
ANXA3	annexin A3		1.0641	1.07056	0.970476	1.15063	0.987573	1.11096	0.834269	1.04875
HIST1H2BM	histone cluster 1, H2bm		0.863339	0.996613	0.863159	0.822566	1.08955	1.33785	1.12156	1.24817
CNTFR	ciliary neurotrophic factor receptor		0.99593	1.03456	1.03838	0.868036	0.967925	0.931927	0.958471	0.854889
BPGM	2,3-bisphosphoglycerate mutase		1.05554	1.05026	1.0098	0.909078	0.974655	1.02969	0.933609	1.03825
CD81	CD81 antigen		0.952465	1.01852	0.943053	0.997017	0.990159	0.960954	0.911427	0.861707
TEK	endothelial-specific receptor tyrosine kinase		0.998846	1.0062	0.860622	1.0085	1.11096	0.982395	0.874776	1.13854
ITCH	itchy, E3 ubiquitin protein ligase		0.903069	0.932347	0.927323	0.790412	0.841108	0.822859	0.790588	0.807937
ZBTB32	zinc finger and BTB domain containing 32		1.03434	1.0698	0.891957	1.08219	0.876723	1.08039	1.0548	0.82195
SNCA	synuclein, alpha		1.11968	0.874466	1.04503	0.825743	0.969125	1.07712	0.850998	1.10987
SLC11A1	solute carrier family 11 (proton-coupled divalent metal ion transporters), member 1		1.08658	1.11149	0.917511	1.32866	1.50547	1.42336	1.16664	1.45201
PLG	plasminogen		0.959119	1.01375	0.971815	0.862306	0.96926	0.962847	0.981276	0.89101
CD40LG	CD40 ligand		0.909226	0.902569	0.856489	0.864843	1.01002	0.983245	0.96511	0.925658
TXK	TXK tyrosine kinase		1.03126	1.06558	0.922435	1.03403	0.968468	0.925939	0.972293	0.861516
NRARP	Notch-regulated ankyrin repeat protein		1.10542	1.2288	0.968103	1.0887	0.946306	1.07612	1.16762	0.912888
HIST1H2BN	histone cluster 1, H2bn		1.04757	0.932623	0.713623	1.06336	0.840628	0.87144	0.967185	0.762307
PF4	platelet factor 4		1.14972	1.14074	1.10498	1.10998	1.01883	1.07337	1.01171	0.937561
H2-D1	histocompatibility 2, D region locus 1		0.912859	1.01161	0.978395	0.902786	1.02955	1.07293	1.05375	0.891654
EPB4.2	erythrocyte protein band 4.2		0.893336	0.721402	0.77389	0.836822	0.897163	0.905444	0.859738	0.778817
HIST4H4	histone cluster 4, H4		0.965838	0.936753	0.93394	1.08331	1.16667	1.20783	1.20109	0.848453
BCL11A	B-cell CLL/lymphoma 11A (zinc finger protein)		1.06033	1.07396	1.03475	1.17729	1.15759	1.48905	1.21309	1.12167
BMP4	bone morphogenetic protein 4		1.02771	0.979288	0.802327	0.917055	1.06678	0.877861	1.21507	0.825719
IL1RL2	interleukin 1 receptor-like 2		1.05425	1.19414	1.03751	1.05442	1.0917	1.09889	0.959892	1.17612
IGBP1	immunoglobulin (CD79A) binding protein 1		1.11091	1.08047	1.08731	0.893689	1.00956	0.935451	0.971462	0.993824
DBH	dopamine beta hydroxylase		0.762269	0.84994	0.721764	0.806588	0.792175	0.936977	0.862129	0.799974
IL2RA	interleukin 2 receptor, alpha chain		0.842858	0.896749	0.807991	0.844002	0.789182	1.07207	1.00966	0.778793
CLCF1	cardiotrophin-like cytokine factor 1		1.0401	0.86127	0.846501	0.914094	0.819841	1.08661	0.94218	0.936698
HIST2H2AC	histone cluster 2, H2ac		0.746502	1.02437	0.844158	0.767025	0.978881	0.948802	1.13473	0.7895
INSR	insulin receptor		1.03336	0.956001	1.0499	0.861192	0.973172	1.01108	0.965266	0.924366
GMPR2	guanosine monophosphate reductase 2		0.989401	1.20601	1.09378	1.01956	1.03798	0.979031	0.875448	1.04089
NF1	neurofibromatosis 1		0.938088	0.99441	0.919244	0.910089	0.91929	0.852471	0.770143	0.945598
TIGIT	T cell immunoreceptor with Ig and ITIM domains		0.993847	0.988827	0.940033	1.05183	1.01999	1.10068	1.14463	0.790592
PATZ1	POZ (BTB) and AT hook containing zinc finger 1		1.04745	1.05635	1.14608	0.934777	1.04435	1.07293	1.17027	0.79444
SIX4	sine oculis-related homeobox 4 homolog (Drosophila)		0.81501	0.906308	0.763904	0.814967	0.85319	0.834634	0.769318	0.92015
CSK	c-src tyrosine kinase		1.10015	0.979214	0.938048	1.04795	1.06212	0.875583	0.898107	0.968594
SSB	Sjogren syndrome antigen B		1.02975	1.01486	0.99978	0.80339	0.791047	0.846472	0.862782	0.867348
JAK3	Janus kinase 3		1.12781	1.06757	1.03438	1.08509	1.10557	1.11203	1.00034	1.11689
LYL1	lymphoblastomic leukemia 1		0.8289	0.864427	0.833135	0.828702	0.922983	1.04225	0.986837	0.865528
ICOSL	icos ligand		1.06247	0.869109	0.875863	1.14862	1.16344	1.01278	0.876238	1.04817
ADA	adenosine deaminase		0.997365	0.985282	0.967025	0.901614	0.829197	0.80436	0.827956	0.779745
RELA	v-rel reticuloendotheliosis viral oncogene homolog A (avian)		0.927736	0.946748	0.844469	1.01056	1.07163	0.954012	0.911037	0.987591
CD46	CD46 antigen, complement regulatory protein		0.921696	1.2927	1.15789	1.05154	0.83731	0.983212	0.780358	0.89596
GLMN	glomulin, FKBP associated protein		0.950395	0.902667	0.794469	0.842051	0.931267	0.889349	0.939516	0.962131
CDKN2A	cyclin-dependent kinase inhibitor 2A		0.937315	0.853442	0.842576	0.948252	1.03161	1.10035	1.13734	0.852575
SCGB1A1	secretoglobin, family 1A, member 1 (uteroglobin)		1.15235	1.00438	1.09539	0.865196	0.916475	0.994079	0.998914	0.960599
PTPN22	protein tyrosine phosphatase, non-receptor type 22 (lymphoid)		1.12926	1.06516	0.98794	1.06733	1.08878	1.07653	0.910804	1.2373
RPA1	replication protein A1		0.983895	0.967621	0.960702	0.868342	0.888501	0.882005	0.932838	0.828497
MYD88	myeloid differentiation primary response gene 88		1.04078	1.09439	1.03885	1.12005	1.01649	0.923837	0.826219	0.946474
SERPINA3H	serine (or cysteine) peptidase inhibitor, clade A, member 3H		0.692941	0.941601	0.871781	0.899322	0.836591	0.895399	0.784297	0.693448
MYLK3	myosin light chain kinase 3		0.946426	0.938413	1.0396	0.909451	1.06873	1.11745	1.08542	0.895253
MAP2K7	mitogen-activated protein kinase kinase 7		0.952223	0.957464	0.911682	0.868543	0.803038	0.862989	0.827595	0.843797
TYR	tyrosinase		0.8588	0.824536	0.761129	0.795917	0.837042	0.779294	0.8742	0.759331
CD8B1	CD8 antigen, beta chain 1		0.924435	0.814724	0.780014	0.901538	0.775639	1.00493	0.979891	0.742509
IL18	interleukin 18		1.10686	1.15	1.17336	0.88758	0.946264	1.0352	0.898939	1.14476
PTPN6	protein tyrosine phosphatase, non-receptor type 6		0.945083	0.965171	0.85776	1.01728	0.92794	0.966673	0.855697	0.954618
CHUK	conserved helix-loop-helix ubiquitous kinase		0.903412	0.972109	1.02237	0.856686	0.85989	0.975153	0.8661	0.853849
SERPINA3K	serine (or cysteine) peptidase inhibitor, clade A, member 3K		0.867442	0.982692	0.943591	0.843973	0.986969	1.06323	1.02276	0.973995
TIMP1	tissue inhibitor of metalloproteinase 1		0.72781	0.731534	0.777479	0.915366	0.706691	0.893439	0.585458	0.690434
ATM	ataxia telangiectasia mutated homolog (human)		0.992454	0.951149	0.898249	0.901678	0.926306	0.956426	0.889281	1.02459
ADIPOQ	adiponectin, C1Q and collagen domain containing		0.861648	0.996111	1.03545	0.977321	1.04268	1.09373	0.958589	0.907438
5830411N06RIK	RIKEN cDNA 5830411N06 gene		0.98554	0.968709	0.959466	0.9757	1.02452	1.09654	1.05034	0.974266
ACSL1	acyl-CoA synthetase long-chain family member 1		0.89975	1.02998	0.950634	0.897564	0.847252	0.925689	0.876938	0.874235
VAV1	vav 1 oncogene		0.844894	1.05538	0.743613	1.01287	0.915049	0.801625	0.720572	1.04115
PNP	purine-nucleoside phosphorylase		0.76505	1.12094	0.905151	0.951452	0.994976	0.837183	0.848158	0.91279
NUMBL	numb-like		0.856382	0.971078	0.853583	1.01112	1.0184	1.08477	0.996397	0.965499
VPREB1	pre-B lymphocyte gene 1		0.873133	1.17983	0.855819	1.02226	0.769905	1.04962	0.915693	0.981859
SLA2	Src-like-adaptor 2		1.05974	1.18294	1.13421	0.977759	0.910077	1.25929	1.27519	0.916586
SASH3	SAM and SH3 domain containing 3		1.02894	1.09084	1.12093	1.01979	1.03403	1.14049	1.03036	1.02775
CD5	CD5 antigen		0.903066	1.00476	0.924202	0.964983	1.12279	0.986959	1.08253	0.956687
PGM3	phosphoglucomutase 3		1.005	0.95048	0.8957	1.01931	0.837592	0.862158	0.701897	0.963165
CYP27B1	cytochrome P450, family 27, subfamily b, polypeptide 1		1.03572	0.864939	1.08877	1.05143	0.931772	1.00957	0.951926	0.671092
SHH	sonic hedgehog		1.16463	1.17646	0.997546	1.15357	1.0387	1.40403	1.55513	0.980949
IL5RA	interleukin 5 receptor, alpha		0.897934	0.866868	0.780829	0.995874	0.851575	0.923009	0.886161	0.806995
PRKDC	protein kinase, DNA activated, catalytic polypeptide		0.953385	1.05814	0.900142	0.957926	0.95957	0.933526	0.900659	1.07255
PAX1	paired box gene 1		0.963536	0.837518	1.02111	0.802361	0.885624	0.979969	1.02647	0.748614
CLEC2I	C-type lectin domain family 2, member i		0.933511	0.961045	0.980175	1.1005	0.926762	1.16742	0.934062	0.903208
TNFRSF14	tumor necrosis factor receptor superfamily, member 14 (herpesvirus entry mediator)		0.94734	0.826988	0.810565	0.831611	0.9126	0.928412	1.08355	0.825493
ELF4	E74-like factor 4 (ets domain transcription factor)		0.93197	0.904405	0.810469	1.05832	1.14598	0.983378	0.931421	1.09648
RAB27A	RAB27A, member RAS oncogene family		0.910282	0.892214	0.974448	0.711326	0.923895	0.706697	0.758249	0.930429
CLEC2G	C-type lectin domain family 2, member g		0.760851	0.769448	0.827904	0.742937	0.780738	0.808841	0.769841	0.726336
IL12B	interleukin 12b		0.869203	0.852014	0.847893	1.00916	0.898459	0.97013	0.845746	0.827627
DDOST	dolichyl-di-phosphooligosaccharide-protein glycotransferase		1.03473	1.08633	0.959139	0.975241	0.865921	0.949679	1.0039	0.937715
CRIP3	cysteine-rich protein 3		0.97769	0.996499	0.81074	1.03158	1.00456	0.837351	1.00719	0.911361
FUT7	fucosyltransferase 7		0.861851	0.795405	0.852594	0.873928	0.825643	0.746936	0.780175	0.68746
IDO1	indoleamine 2,3-dioxygenase 1		0.736925	0.78063	0.918112	0.872482	1.00662	0.947168	0.8764	0.77639
RELB	avian reticuloendotheliosis viral (v-rel) oncogene related B		0.94363	0.952937	0.950732	0.88772	0.92642	1.05802	1.09629	0.919735
DOCK2	dedicator of cyto-kinesis 2		0.9867	1.06568	0.865147	1.32182	0.965256	1.00126	0.871255	0.93837
CD86	CD86 antigen		1.18043	1.0876	0.863833	1.3639	1.24241	1.31189	0.829641	1.74778
CASP3	caspase 3		0.933866	0.865153	0.842897	1.00489	0.914071	0.772844	0.770519	0.856121
MSH2	mutS homolog 2 (E. coli)		0.801393	0.926142	0.884664	0.791759	0.882406	0.81893	0.687637	1.05388
RHOH	ras homolog gene family, member H		0.852726	0.867788	0.855705	0.98091	0.956509	1.10486	0.866643	1.08022
FKBP1B	FK506 binding protein 1b		1.04034	1.04798	0.938839	0.845498	0.731681	0.854937	1.0332	0.859457
IL6	interleukin 6		0.846614	0.857674	0.788704	0.827911	0.829284	0.794084	0.832575	0.916176
UBE2V1	ubiquitin-conjugating enzyme E2 variant 1		0.907597	0.943107	0.96856	0.776616	0.556922	0.77627	0.360177	1.12815

## Sheet: Adipogenesis
Gene name	description		LF-NP_1W	HF-NP_1W	LF-HP_1W	HF-HP_1W	LF-NP_12W	HF-NP_12W	LF-HP_12W	HF-HP_12W
PNPLA3	patatin-like phospholipase domain containing 3		0.877525	0.750496	0.495358	0.544286	0.928648	0.858921	0.696106	0.327795
CYP26A1	cytochrome P450, family 26, subfamily a, polypeptide 1		1.01286	0.457595	0.611404	0.324113	0.604937	0.384613	0.414315	0.347976
GADD45A	growth arrest and DNA-damage-inducible 45 alpha		1.3849	1.01451	0.889243	1.03451	1.52178	1.48656	1.21036	0.857862
SREBF1	sterol regulatory element binding transcription factor 1		1.49377	1.10381	0.856845	0.838631	1.72489	1.30111	1.61015	0.927835
ID3	inhibitor of DNA binding 3		1.2883	1.36891	0.70826	1.28018	1.22434	1.10467	0.91282	0.938346
STAT5A	signal transducer and activator of transcription 5A		0.985475	1.11835	0.892103	0.818515	0.971713	1.05909	0.871242	0.757428
SMAD3	MAD homolog 3 (Drosophila)		1.07738	1.22559	0.885621	0.943907	1.24632	1.02468	0.880635	1.04319
STAT5B	signal transducer and activator of transcription 5B		1.01782	0.993589	0.856491	0.815138	1.16243	0.955649	0.892448	0.868939
PPARA	peroxisome proliferator activated receptor alpha		0.890694	1.00932	0.85998	0.805317	0.935779	0.968907	0.817152	0.749718
RARA	retinoic acid receptor, alpha		1.04301	1.12551	0.900311	0.992788	1.08171	1.05018	0.917572	0.861576
CFD	complement factor D (adipsin)		0.91341	1.01338	0.816948	0.894118	0.964215	1.30974	1.10114	0.810091
EPAS1	endothelial PAS domain protein 1		0.996813	0.977388	0.917839	0.820338	1.02872	0.909694	0.933736	0.720903
NCOA2	nuclear receptor coactivator 2		0.968725	0.925764	0.85576	0.838523	0.975751	0.867816	0.717267	0.837853
TLE3	transducin-like enhancer of split 3, homolog of Drosophila E(spl)		1.21064	1.20004	1.02809	1.10928	1.39808	1.34302	1.16317	1.19367
IRS3	insulin receptor substrate 3		1.03492	0.992744	0.960014	0.880193	1.11648	1.18039	1.14272	0.797294
RXRG	retinoid X receptor gamma		1.13747	1.18507	0.928117	0.798568	1.11994	1.10295	1.19215	1.07475
PLIN1	perilipin 1		1.11118	1.16103	1.07472	1.05405	0.970942	1.39827	1.08775	0.863529
SLC2A4	solute carrier family 2 (facilitated glucose transporter), member 4		1.05208	0.902737	0.927664	0.996465	1.53262	1.05609	1.22884	0.845619
STAT1	signal transducer and activator of transcription 1		0.947336	1.09654	0.785947	0.944099	0.979001	0.990576	0.934022	0.871567
STAT6	signal transducer and activator of transcription 6		1.15395	1.04309	0.94464	0.973514	1.23645	1.05739	1.00478	1.03954
MEF2A	myocyte enhancer factor 2A		0.974271	0.936519	0.845598	0.890142	0.999091	0.894595	0.781044	0.849413
BMP3	bone morphogenetic protein 3		0.960658	1.17578	0.959213	0.826475	0.954678	1.03726	1.16939	0.703103
PLIN2	perilipin 2		0.9381	1.10096	0.852298	0.954693	0.853365	0.936829	0.792399	0.803875
NCOR1	nuclear receptor co-repressor 1		0.968339	0.973923	0.934568	0.824649	0.995824	1.01224	0.901937	0.852443
EBF1	early B-cell factor 1		0.859141	0.874872	0.804744	0.82415	1.05109	1.06882	0.966452	0.834385
CEBPA	CCAAT/enhancer binding protein (C/EBP), alpha		1.2295	1.03491	0.943998	1.03123	1.07426	0.97586	1.02182	0.864484
CELF1	CUGBP, Elav-like family member 1		1.01793	1.03871	0.914592	0.86393	0.944031	0.884109	0.826893	0.904364
GATA4	GATA binding protein 4		1.14639	0.995894	0.952682	0.920699	1.11669	1.14894	1.1261	0.987434
SOCS1	suppressor of cytokine signaling 1		1.10761	0.951221	0.971213	1.08352	1.00676	1.1495	1.03786	0.742691
TNF	tumor necrosis factor		1.00263	0.830323	0.945429	1.00806	1.0856	1.39067	1.14873	0.827993
NR2F1	nuclear receptor subfamily 2, group F, member 1		0.929903	0.925863	0.784827	0.910806	0.848147	0.96403	1.00798	0.652954
UCP1	uncoupling protein 1 (mitochondrial, proton carrier)		0.746698	0.966386	0.952213	0.939499	1.00036	1.23997	0.900943	0.839838
RETN	resistin		1.00374	0.897757	0.9184	0.995562	1.06166	1.42803	1.07618	1.04485
INS2	insulin II		1.16494	1.1027	0.940057	1.11763	1.15978	1.23186	1.19568	1.03064
LIFR	leukemia inhibitory factor receptor		1.0043	1.1001	0.905808	0.969219	0.98067	0.941537	0.901673	0.92725
GATA3	GATA binding protein 3		0.974853	0.800395	0.699763	0.727726	0.712449	0.812493	0.934696	0.677618
OSM	oncostatin M		0.75198	0.849626	0.825034	0.853642	0.861199	1.11377	0.873448	0.742833
AGPAT2	1-acylglycerol-3-phosphate O-acyltransferase 2 (lysophosphatidic acid acyltransferase, beta)		1.02397	1.08692	0.881613	0.99266	1.1263	1.09695	1.11426	1.00846
KLF7	Kruppel-like factor 7 (ubiquitous)		0.999119	1.17926	0.950358	1.20259	1.32973	1.13192	1.088	1.04025
BSCL2	Bernardinelli-Seip congenital lipodystrophy 2 homolog (human)		0.879171	0.961185	0.877171	0.966565	1.12197	1.03193	0.869208	0.982982
CYP26B1	cytochrome P450, family 26, subfamily b, polypeptide 1		0.69003	0.644016	0.665095	0.505116	0.605796	0.44939	0.532515	0.508971
FAS	Fas (TNF receptor superfamily member 6)		0.963053	1.06921	1.07219	0.874683	0.81705	0.814794	0.763561	0.686147
KLF5	Kruppel-like factor 5		0.99131	0.915022	0.983677	0.932441	1.25688	1.01854	1.15881	0.808172
MEF2C	myocyte enhancer factor 2C		1.08144	1.18339	0.967121	1.14699	1.23475	1.05949	0.999901	1.12282
IRS1	insulin receptor substrate 1		1.03112	1.13393	1.06892	1.00905	1.18523	0.990741	0.824643	1.13195
IL6ST	interleukin 6 signal transducer		0.995587	0.989579	0.886204	0.980254	1.05643	1.00514	0.938634	0.963028
HMGA1	high mobility group AT-hook 1		0.989816	0.950697	0.907344	0.82385	0.950469	1.01002	1.04161	0.866771
DVL1	dishevelled, dsh homolog 1 (Drosophila)		1.02576	1.02307	0.944813	0.888523	1.00332	0.82128	0.876839	0.911211
PTGIS	prostaglandin I2 (prostacyclin) synthase		1.01329	1.04386	0.950582	1.18109	1.14517	1.13008	1.03349	0.889776
SP1	trans-acting transcription factor 1		0.969238	0.884979	0.937228	0.968131	1.0612	1.06607	0.822466	1.00495
CTNNB1	catenin (cadherin associated protein), beta 1		0.981442	0.977498	0.865467	0.899779	0.993695	0.948647	0.921859	0.971068
STAT2	signal transducer and activator of transcription 2		1.11801	1.12759	0.852949	1.02579	1.1039	0.955409	1.07637	1.08737
SFRP4	secreted frizzled-related protein 4		1.06438	1.00496	0.964406	0.899936	0.808396	1.12319	0.838302	1.0612
FOXC2	forkhead box C2		0.743403	0.915279	0.760634	0.786858	0.986165	0.903281	0.931303	0.860897
WWTR1	WW domain containing transcription regulator 1		1.02176	1.0191	1.04602	0.945836	0.954388	1.17554	0.977062	0.95892
STAT3	signal transducer and activator of transcription 3		0.949045	0.844879	0.977656	0.846243	0.924257	0.934375	0.753383	0.874363
CNTFR	ciliary neurotrophic factor receptor		0.99593	1.03456	1.03838	0.868036	0.967925	0.931927	0.958471	0.854889
BMP1	bone morphogenetic protein 1		0.887758	0.9745	0.919325	0.869944	0.904628	0.855093	0.812144	0.834566
NCOA1	nuclear receptor coactivator 1		0.901937	0.959704	0.878246	0.899085	0.929644	0.908064	0.788279	0.953401
BMP4	bone morphogenetic protein 4		1.02771	0.979288	0.802327	0.917055	1.06678	0.877861	1.21507	0.825719
MEF2B	myocyte enhancer factor 2B		1.12141	0.972691	0.916504	0.958116	1.00507	0.968207	1.17956	0.827481
SPOCK1	sparc/osteonectin, cwcv and kazal-like domains proteoglycan 1		0.988616	1.14099	1.02129	1.02335	1.08838	1.23985	1.27476	0.937689
NR1H3	nuclear receptor subfamily 1, group H, member 3		0.970192	1.00815	0.915266	0.95216	1.07884	0.997065	0.9498	1.06388
WNT10B	wingless related MMTV integration site 10b		1.03835	1.00261	1.01784	1.12854	1.049	1.22663	1.15108	0.848325
LPIN1	lipin 1		0.727743	0.639427	0.678522	0.573738	0.523229	0.342574	0.416478	0.476597
PPARD	peroxisome proliferator activator receptor delta		0.875767	0.997633	0.939624	0.861035	0.904844	0.88442	0.889704	0.871609
DLK1	delta-like 1 homolog (Drosophila)		0.962299	0.929952	0.947093	0.919203	0.877482	1.09137	1.18127	0.730644
MIXL1	Mix1 homeobox-like 1 (Xenopus laevis)		0.852454	0.823674	0.812635	0.787677	0.871863	0.969419	0.952976	0.923273
GH	growth hormone		0.776314	0.740203	0.735375	0.90744	0.838111	1.07031	0.956689	0.803398
LPIN2	lipin 2		0.60106	0.803332	0.727245	0.798054	0.645858	0.591143	0.472213	0.6388
IRS2	insulin receptor substrate 2		0.759296	0.735762	0.710777	0.675296	0.791488	0.679689	0.632573	0.978176

## Sheet: FA-oxidation
Gene name	description		LF-NP_1W	HF-NP_1W	LF-HP_1W	HF-HP_1W	LF-NP_12W	HF-NP_12W	LF-HP_12W	HF-HP_12W
PPARGC1A	peroxisome proliferative activated receptor, gamma, coactivator 1 alpha		0.666167	0.665262	1.59808	1.96655	0.80484	0.556472	1.19865	2.5339
CD36	CD36 antigen		0.533004	0.958326	1.91635	1.64122	0.578635	1.05639	1.40811	1.64549
ACSL4	acyl-CoA synthetase long-chain family member 4		0.875551	1.08888	1.44158	2.098	0.839584	0.720877	1.3945	1.60818
LPL	lipoprotein lipase		0.857558	1.55601	1.74598	2.4531	0.985772	1.05438	1.37188	2.21307
EHHADH	enoyl-Coenzyme A, hydratase/3-hydroxyacyl Coenzyme A dehydrogenase		0.506573	1.16567	1.21254	1.22648	0.45602	0.601177	0.651848	0.752583
PNPLA2	patatin-like phospholipase domain containing 2		1.13834	1.15369	1.55071	1.41009	0.998982	0.83061	1.31563	1.36302
GSTT2	glutathione S-transferase, theta 2		1.04322	1.08256	1.29748	1.12642	0.835747	0.65649	1.16468	1.24621
LIPE	lipase, hormone sensitive		1.06441	1.13517	1.32505	1.32356	1.06322	0.919292	1.35056	1.17231
ACSL5	acyl-CoA synthetase long-chain family member 5		0.830208	0.97477	1.07446	1.04576	0.775837	0.842955	1.05645	0.986486
ACSL3	acyl-CoA synthetase long-chain family member 3		0.663494	1.11659	0.995258	1.18084	0.844637	0.938097	0.967783	1.18486
ACSS2	acyl-CoA synthetase short-chain family member 2		1.08697	1.0442	1.0415	1.22592	0.904191	0.806916	1.27611	1.0415
STRADA	STE20-related kinase adaptor alpha		1.22643	1.12407	1.3288	1.27198	1.27537	0.921556	1.34024	1.43512
DLD	dihydrolipoamide dehydrogenase		0.923032	1.09571	1.18672	1.09373	0.911009	0.969018	1.18636	1.08698
POR	P450 (cytochrome) oxidoreductase		1.04895	1.04617	1.2907	1.07248	0.847005	0.813193	0.966957	0.982099
POR	P450 (cytochrome) oxidoreductase		1.04895	1.04617	1.2907	1.07248	0.847005	0.813193	0.966957	0.982099
HADHB	hydroxyacyl-Coenzyme A dehydrogenase/3-ketoacyl-Coenzyme A thiolase/enoyl-Coenzyme A hydratase (trifunctional protein), beta subunit		0.79694	1.28615	1.19904	1.26109	0.91713	0.984371	1.09343	1
MLYCD	malonyl-CoA decarboxylase		1.04469	1.06198	1.13654	1.12014	0.93124	0.87485	1.12138	1.04553
TPI1	triosephosphate isomerase 1		1.03484	0.985029	1.08081	1.20356	1.14398	0.96181	1.07757	1.21236
BDH2	3-hydroxybutyrate dehydrogenase, type 2		1.35806	1.17231	1.24681	1.03343	1.03818	1.02975	1.40679	1.37664
GCDH	glutaryl-Coenzyme A dehydrogenase		1.00391	1.00899	1.08381	1.07849	0.866471	0.97756	1.00899	1.02882
ACACB	acetyl-Coenzyme A carboxylase beta		0.82581	0.849736	0.815011	0.824301	0.658644	0.658775	0.820034	0.774513
ACADVL	acyl-Coenzyme A dehydrogenase, very long chain		0.813655	1.06181	0.976287	0.97334	0.834754	0.765282	0.891033	0.908901
MTOR	mechanistic target of rapamycin (serine/threonine kinase)		1.03083	1.02554	1.08672	1.03357	0.966973	0.904174	1.00533	1.10669
CPT1B	carnitine palmitoyltransferase 1b, muscle		0.813841	1.14341	1.02875	0.978531	0.840282	0.737067	0.760738	1.03066
ACADM	acyl-Coenzyme A dehydrogenase, medium chain		0.896022	0.988239	0.982872	1.0363	0.804229	0.84066	0.830446	0.929619
ACOX1	acyl-Coenzyme A oxidase 1, palmitoyl		0.857704	1.04389	0.979821	1.01654	0.791618	0.886654	0.904839	0.925718
ETFDH	electron transferring flavoprotein, dehydrogenase		0.843868	1.00404	1.05	0.938079	0.782708	0.848953	0.853032	0.863734
CPT2	carnitine palmitoyltransferase 2		0.86574	1.01803	1.02088	1.01588	0.866914	0.85656	0.854994	0.943069
ECHS1	enoyl Coenzyme A hydratase, short chain, 1, mitochondrial		0.987381	1.08012	1.04518	1.01674	0.928255	0.89253	1.08927	0.981226
CNR1	cannabinoid receptor 1 (brain)		1.08361	1.17051	1.17051	1.143	1.17051	1.28938	1.51008	1.17051
PEX7	peroxisomal biogenesis factor 7		0.996103	0.98041	1.08275	0.926579	0.873681	0.901462	0.981469	0.978106
ACADL	acyl-Coenzyme A dehydrogenase, long-chain		0.969968	1.0748	1.11028	0.95744	0.838622	0.887465	0.962156	0.953883
PHYH	phytanoyl-CoA hydroxylase		0.892041	1.03368	1.04517	0.970173	1.00152	0.984922	1.09992	1.00876
AKT1	thymoma viral proto-oncogene 1		1.02432	0.985377	1.00732	0.997114	1.04264	0.92833	1.0677	1.10521
ADIPOR1	adiponectin receptor 1		1.0024	1.06064	1.08379	1.11656	1.06064	1.01498	1.06064	1.07129
STRADB	STE20-related kinase adaptor beta		1.01997	0.972695	1.04832	1.04385	0.995828	0.955519	0.978926	1.01195
PEX5	peroxisomal biogenesis factor 5		0.937277	0.937277	0.9582	0.897294	0.913428	0.904592	0.947273	1.01988
CRAT	carnitine acetyltransferase		0.704064	0.984692	0.896398	1.04724	0.848135	0.761675	0.716144	0.746468
HADHA	hydroxyacyl-Coenzyme A dehydrogenase/3-ketoacyl-Coenzyme A thiolase/enoyl-Coenzyme A hydratase (trifunctional protein), alpha subunit		0.8962	1.02412	0.965025	0.933333	0.860643	0.88812	0.921384	0.956238
LIPF	lipase, gastric		0.966101	1.06501	1.00396	1.15604	1.07332	1.06501	1.06501	1.06501
IRS2	insulin receptor substrate 2		0.758529	0.752943	0.737058	0.712111	0.801702	0.713798	0.684454	0.972164
PPARG	peroxisome proliferator activated receptor gamma		1.28551	0.834514	1.12106	1.30772	1.21617	1.45812	1.21617	1.27131
SLC25A20	solute carrier family 25 (mitochondrial carnitine/acylcarnitine translocase), member 20		0.837607	1.01497	0.955216	0.926059	0.796036	0.826639	0.858326	0.823605
PRKAG2	protein kinase, AMP-activated, gamma 2 non-catalytic subunit		1.00662	0.903974	1.05388	0.960357	1.06496	0.836647	1.01066	0.87809
ACOT8	acyl-CoA thioesterase 8		0.87497	1.15721	1.03826	0.92759	0.70541	0.765572	0.788611	0.824654
C1QTNF2	C1q and tumor necrosis factor related protein 2		0.777258	0.901865	0.901865	0.901865	0.901865	0.901865	0.901865	0.845668
PRKAG3	protein kinase, AMP-activated, gamma 3 non-catatlytic subunit		1.00582	1.06705	1.13612	1.00382	0.924913	1.07671	1.00582	1.00582
ACSBG2	acyl-CoA synthetase bubblegum family member 2		0.85885	0.917492	0.999459	0.89037	0.861971	1.03855	0.917492	0.934632
ADIPOQ	adiponectin, C1Q and collagen domain containing		0.890143	0.919547	0.98125	0.994221	0.995062	0.987825	0.964739	0.903308
APOM	apolipoprotein M		1.07997	1.01485	1.08784	0.886325	0.961781	0.885995	1.11885	0.895829
ACADS	acyl-Coenzyme A dehydrogenase, short chain		0.970884	1.06724	1.02755	1.02111	0.938383	0.975023	0.905836	1.01708
ACSL6	acyl-CoA synthetase long-chain family member 6		0.847897	0.8143	0.905948	0.876321	0.773261	0.92628	0.879617	0.67994
DBI	diazepam binding inhibitor		0.940436	0.97078	1.05182	0.998738	1.06103	0.994785	0.954337	0.934005
PRKAB2	protein kinase, AMP-activated, beta 2 non-catalytic subunit		1.07418	1.23892	1.03351	1.03351	1.01977	0.889656	1.09144	1.03351
AKT2	thymoma viral proto-oncogene 2		0.979123	1.06341	1.00656	1.02116	1.04149	1.06634	0.994847	1.09335
ACAA2	acetyl-Coenzyme A acyltransferase 2 (mitochondrial 3-oxoacyl-Coenzyme A thiolase)		0.945755	1.03009	0.982969	0.961927	0.982969	0.991274	0.982969	0.974718
GYK	glycerol kinase		0.935312	0.902101	0.982862	0.911784	0.915872	0.975652	0.878047	0.904664
PECR	peroxisomal trans-2-enoyl-CoA reductase		1.02529	1.09247	1.109	0.926369	1.01751	1.01751	1.01751	1.01027
GK2	glycerol kinase 2		1.03962	1.02433	1	1	1.03051	1	0.923653	1.07977
ACSL1	acyl-CoA synthetase long-chain family member 1		0.920765	1.03015	0.94612	0.934371	0.855968	0.925328	0.877125	0.889206
ADH7	alcohol dehydrogenase 7 (class IV), mu or sigma polypeptide		0.929043	0.959643	0.890961	0.929043	0.929043	0.929043	0.929043	0.869555
ACAT1	acetyl-Coenzyme A acetyltransferase 1		0.895326	1.01062	0.910499	0.846142	0.794941	0.904317	0.824666	0.899501
HADH	hydroxyacyl-Coenzyme A dehydrogenase		0.967577	1.00834	1.01134	1.00081	1.00719	1.04627	0.959978	0.914231
MAPK14	mitogen-activated protein kinase 14		1.00216	0.994212	1.00478	0.896924	1.05726	1.0069	0.988149	1.01743
ACAA1A	acetyl-Coenzyme A acyltransferase 1A		0.901827	1.12943	1.0014	0.908699	0.83139	0.850173	0.83506	0.822459
PRKAA2	protein kinase, AMP-activated, alpha 2 catalytic subunit		0.958895	0.975342	0.79933	0.999301	0.99086	1.00597	0.97993	0.980592
CAB39	calcium binding protein 39		0.921254	0.942482	0.970423	0.875508	0.917723	0.908296	0.805977	0.874217
DECR1	2,4-dienoyl CoA reductase 1, mitochondrial		0.839046	1.0211	0.934921	0.833339	0.754897	0.798567	0.744809	0.748255
PRKAB1	protein kinase, AMP-activated, beta 1 non-catalytic subunit		1.30896	1.05871	1.17755	1.08709	1.39306	1.21155	1.24823	1.19205
PEX13	peroxisomal biogenesis factor 13		0.911283	0.966999	0.868945	0.867708	0.861834	0.849776	0.813878	0.845649
CAB39L	calcium binding protein 39-like		0.922902	0.985555	0.947649	0.799535	0.936695	0.953059	0.929715	0.91554
HSD17B4	hydroxysteroid (17-beta) dehydrogenase 4		0.882369	1.07102	0.958329	0.882142	0.811023	0.869521	0.754481	0.840839
PRKAG1	protein kinase, AMP-activated, gamma 1 non-catalytic subunit		1.08438	1.05723	0.98802	0.948029	1.05592	0.928051	0.962092	0.97218
STK11	serine/threonine kinase 11		1.07609	1.01752	0.983111	0.998571	1.10176	0.970014	0.915207	1.0057
ABCD1	ATP-binding cassette, sub-family D (ALD), member 1		1.118	0.888667	1.04815	0.888184	1.18582	1.08585	1.02417	1.04491
CPT1A	carnitine palmitoyltransferase 1a, liver		1.04216	0.940784	0.935204	0.84691	0.940494	0.955219	0.917707	0.922471
CHKB	choline kinase beta		0.922732	1.23395	0.925172	0.908202	0.81263	0.835298	0.80033	0.907353
ALOX12	arachidonate 12-lipoxygenase		1.0391	1.07831	1.05478	1.098	1.11352	1.22185	1.07793	0.909323
ACOX2	acyl-Coenzyme A oxidase 2, branched chain		0.966199	1.09916	1.01582	0.939314	0.940274	0.887733	0.811434	0.851129
PRKAA1	protein kinase, AMP-activated, alpha 1 catalytic subunit		0.967459	1.09727	0.949712	1.00341	0.934369	0.971715	0.852396	0.881655
IRS1	insulin receptor substrate 1		1.03527	1.13078	1.03544	0.992646	1.16604	1.01151	0.797738	1.12038
ACOX3	acyl-Coenzyme A oxidase 3, pristanoyl		1.13742	1.08921	0.96078	0.907609	0.962131	0.868789	0.90689	0.897547
HAO1	hydroxyacid oxidase 1, liver		1.01221	0.986621	0.884354	0.870759	0.957029	0.995514	0.980833	0.835879
SCP2	sterol carrier protein 2, liver		0.916819	1.00207	0.863798	0.900179	1.06474	1.11878	0.983363	0.957454
ACOXL	acyl-Coenzyme A oxidase-like		0.882032	1.04409	0.779588	0.948779	1.14295	0.985545	0.983384	0.926806
HACL1	2-hydroxyacyl-CoA lyase 1		0.88641	0.821176	0.803371	0.742142	0.786283	0.772575	0.689854	0.624285
LIPC	lipase, hepatic		0.920907	1.02705	0.919204	0.772473	0.960908	0.956247	0.830459	0.81861
PPARA	peroxisome proliferator activated receptor alpha		0.89852	1.01661	0.860388	0.812854	0.942531	0.943823	0.816728	0.770021
FABP1	fatty acid binding protein 1, liver		0.890308	0.978212	0.812137	0.7605	0.892168	0.988948	0.846654	0.779358
ADIPOR2	adiponectin receptor 2		1.03942	1.09553	0.872174	0.914489	1.0368	1.15453	0.985411	0.893456
GPD2	glycerol phosphate dehydrogenase 2, mitochondrial		0.96932	0.923903	0.659843	0.564726	1.03759	0.940142	0.672682	0.584593
